# Supplementary material for: Identification of microflora related to growth performance in pigs based on 16S rRNA sequence analyses
Source: AMB Express. 2020 Oct 29;10:192. doi: 10.1186/s13568-020-01130-3 (PMC7596147; doi:10.1186/s13568-020-01130-3)
Supplement: Supplementary file 6 — Additional file 6: Table S4. Genus level intestinal microbiota difference analysis results for the different pig breeds. [file 13568_2020_1130_MOESM6_ESM.xlsx]

## Sheet: diff_genus_reads.D.vs.L
diff_genus_reads.D.vs.L
	Freq1	Freq2	pValue	qValue	Difference between means	95.0% lower CI	95.0% upper CI	MD1	MD2	MD3	MD4	MD5	MD6	MD7	MD8	MD9	MD10	MD11	ML1	ML2	ML3	ML4	ML5	ML6	ML7	ML8	ML9	ML10
Methanosphaera	0.0067318	0.025033	0.00148065	0.546359	-0.0183012	-0.0281897	-0.00841263	4	0	9	3	8	2	8	5	0	0	0	25	14	15	27	10	11	4	14	10	4
Romboutsia	0.222001	0.539735	0.004389	0.80977	-0.317734	-0.520454	-0.115013	359	167	98	14	104	109	57	125	87	67	93	423	227	102	414	190	294	442	343	347	69
Cellulosibacter	0.00548336	0.0191107	0.0059295	0.729329	-0.0136273	-0.022572	-0.00468264	0	1	0	4	8	0	6	2	1	5	4	20	4	3	3	12	13	8	14	14	7
Prevotella	0.295616	0.561912	0.00812159	0.749217	-0.266296	-0.450783	-0.0818101	271	60	85	100	153	184	172	235	162	89	200	439	624	111	354	350	166	238	287	314	160
Escherichia/Shigella	0.220997	1.31498	0.010076	0.743607	-1.09398	-1.86122	-0.32674	271	146	103	21	14	302	62	49	95	46	144	709	348	644	524	1834	140	1569	345	887	158
Anaerobacterium	0.00284593	0.017331	0.0135326	0.832257	-0.014485	-0.0253247	-0.00364538	3	2	0	0	7	0	0	4	0	0	0	4	13	0	0	12	12	0	21	9	16
Dorea	0.908781	0.261073	0.0155581	0.820135	0.647709	0.145461	1.14996	264	307	874	1004	134	454	241	140	1274	257	343	106	18	492	112	60	72	114	285	72	82
Parabacteroides	0.00262066	0.00944241	0.015938	0.735141	-0.00682175	-0.0121628	-0.0014807	7	1	0	1	3	0	1	1	0	0	1	6	4	0	12	5	6	1	9	3	3
Salinispira	0.00635088	0	0.0169928	0.696706	0.00635088	0.00140096	0.0113008	2	0	2	9	0	6	6	12	0	1	0	0	0	0	0	0	0	0	0	0	0
Clostridium XVIII	0.0660893	0.0197453	0.0209337	0.772454	0.046344	0.008294	0.0843941	49	16	23	68	35	6	14	50	1	94	29	20	4	4	3	5	0	22	26	24	4
Lactobacillus	37.2513	18.7764	0.0228207	0.765532	18.4749	2.86367	34.0862	13280	9958	28330	23495	8618	4030	27631	16172	31514	25785	30592	1084	7453	25985	4442	17609	3996	10778	4024	2669	20621
Bulleidia	0.24557	0.112015	0.0240675	0.740076	0.133554	0.0202801	0.246829	104	85	109	62	139	161	74	389	28	160	130	28	14	125	84	49	38	133	56	26	46
Megasphaera	0.0029016	0.0221278	0.0276106	0.783716	-0.0192262	-0.0358347	-0.00261757	0	0	4	0	0	5	0	0	2	5	0	4	34	0	8	22	18	0	1	17	5
Barnesiella	1.32447	7.42849	0.0360486	0.950137	-6.10402	-11.7171	-0.490913	647	2025	113	311	1041	435	1320	1104	83	315	214	6638	12892	119	590	1953	857	1027	1173	9124	6144
Defluviitalea	0.00250303	0.000674766	0.0370416	0.911224	0.00182827	0.000125818	0.00353072	1	0	1	2	3	3	0	1	0	1	2	0	0	0	1	1	1	0	0	0	0
Pseudobutyrivibrio	0.10369	0.0199708	0.0453324	1	0.0837193	0.00209502	0.165344	219	20	30	55	97	1	43	91	1	23	24	34	3	17	6	12	0	1	6	20	12
Acetanaerobacterium	0.221296	0.410972	0.0456192	0.990206	-0.189676	-0.375254	-0.00409825	130	6	69	15	310	185	142	73	21	184	83	274	406	149	182	310	109	96	428	87	192
Anaeroplasma	0.0131374	0.00260547	0.0498355	1	0.010532	8.80552e-06	0.0210551	22	4	1	11	4	0	2	24	0	9	2	2	0	0	0	0	0	2	0	9	1
Lutispora	0	0.00721332	0.0566187	1	-0.00721332	-0.014678	0.000251321	0	0	0	0	0	0	0	0	0	0	0	13	1	0	0	0	0	5	7	15	0
Selenomonas	0.000159255	0.00182421	0.0646946	1	-0.00166495	-0.00345305	0.00012314	0	0	1	0	0	0	0	0	0	0	0	2	0	2	3	0	2	0	0	0	0
Cloacibacillus	0.000344895	0.00143783	0.0688116	1	-0.00109294	-0.00227969	9.38157e-05	2	0	0	0	0	0	0	0	0	0	0	1	2	2	1	1	0	0	0	1	0
Anaerobacter	2.33419	3.98498	0.0724543	1	-1.65079	-3.4692	0.167622	2399	1298	636	385	1229	2850	192	1351	984	636	1226	3301	1308	1076	4545	1158	1911	2522	3124	1901	477
Anaerofilum	0.0036805	0.00689093	0.0797579	1	-0.00321043	-0.00684328	0.000422434	2	0	4	1	1	4	0	3	1	5	0	8	0	3	5	5	3	6	4	3	0
Labrenzia	0.000521741	0	0.0840567	1	0.000521741	-8.42975e-05	0.00112778	0	0	0	0	0	1	1	1	0	0	0	0	0	0	0	0	0	0	0	0	0
Dietzia	0.0310889	0.0926083	0.0842383	1	-0.0615194	-0.132903	0.00986444	13	24	22	1	2	27	0	0	52	8	29	43	22	17	13	6	91	109	133	7	27
Allisonella	0.000148982	0.00578381	0.0859171	1	-0.00563482	-0.0122445	0.000974815	0	0	0	0	0	0	0	1	0	0	0	18	3	1	8	2	0	0	1	1	0
Citrobacter	0.000833418	0	0.093101	1	0.000833418	-0.000167023	0.00183386	0	0	0	0	0	0	0	2	2	1	0	0	0	0	0	0	0	0	0	0	0
Phascolarctobacterium	0.0243788	0.109709	0.0984024	1	-0.0853303	-0.189977	0.0193167	32	9	3	9	14	10	13	23	6	14	8	312	54	5	22	35	33	94	18	36	11
Oscillibacter	1.3619	2.03832	0.0988278	1	-0.676425	-1.49216	0.139312	657	1640	306	818	747	952	623	1482	84	462	95	1693	1940	596	1013	1029	485	734	815	1785	932
Parvibacter	0.0864512	0.0432897	0.0991437	1	0.0431615	-0.00903269	0.0953557	47	106	52	106	72	14	18	42	4	25	16	18	26	13	5	12	7	14	9	75	49
Massilia	0.000878924	0	0.100883	1	0.000878924	-0.000204798	0.00196265	0	0	2	1	2	0	0	0	0	0	0	0	0	0	0	0	0	0	0	0	0
Mucispirillum	0.00211052	0.000195454	0.101802	1	0.00191507	-0.000448233	0.00427837	6	0	0	1	2	0	0	1	0	2	0	0	0	0	0	1	0	0	0	0	0
Acidaminococcus	0	0.000688514	0.107911	1	-0.000688514	-0.00156105	0.000184023	0	0	0	0	0	0	0	0	0	0	0	1	1	0	2	0	0	0	0	0	0
Turicibacter	0.257749	0.455584	0.111308	1	-0.197835	-0.446542	0.0508716	437	193	86	19	135	121	22	235	72	79	96	399	286	64	169	122	199	673	299	191	69
Dialister	0.000370437	0.0378153	0.112945	1	-0.0374449	-0.0856783	0.0107886	1	0	0	0	1	0	0	0	0	0	0	11	10	0	87	1	58	0	7	0	0
Howardella	0.000901388	0.00193989	0.116766	1	-0.0010385	-0.00236257	0.000285563	2	0	1	0	1	1	0	0	0	0	0	2	1	1	0	1	0	2	2	2	0
Ruminococcus2	0.444542	0.228195	0.118153	1	0.216347	-0.0627567	0.495451	126	171	137	252	158	231	124	362	809	118	82	105	34	278	239	63	64	104	244	57	54
Schwartzia	0.0201771	0.0515099	0.118809	1	-0.0313328	-0.0715067	0.00884108	71	0	7	0	2	27	0	7	0	0	0	56	82	4	52	16	5	8	12	40	13
Bacillus	0.00121066	0.0105986	0.119966	1	-0.00938794	-0.0217422	0.00296627	1	0	1	1	2	0	0	0	0	0	2	32	18	0	2	1	0	6	2	0	2
Serpens	0	0.00182306	0.123124	1	-0.00182306	-0.00424732	0.000601193	0	0	0	0	0	0	0	0	0	0	0	0	0	0	0	1	0	5	0	4	0
Mitsuokella	0.000525698	0.00261105	0.127994	1	-0.00208535	-0.00487556	0.00070485	0	0	1	0	0	0	0	0	0	2	0	2	1	0	0	6	2	0	2	0	0
Pilibacter	0.000729193	0.00186505	0.129975	1	-0.00113585	-0.00264395	0.000372249	0	2	0	0	0	1	0	0	0	1	0	1	1	2	0	0	2	0	1	1	1
Falsiporphyromonas	0.0247832	0.0466648	0.135981	1	-0.0218816	-0.0516667	0.00790351	26	12	1	3	23	7	25	18	3	17	6	53	70	1	12	44	1	18	15	30	17
Sharpea	0.00202615	0.00598228	0.137804	1	-0.00395613	-0.00935054	0.00143828	0	1	0	0	0	6	0	2	1	1	0	2	1	1	5	4	3	1	14	0	1
Oxalobacter	0.0011448	0.0339928	0.141682	1	-0.032848	-0.078974	0.0132779	0	0	0	0	0	1	1	4	1	0	0	129	15	0	7	10	0	1	1	33	3
Janibacter	0.000176116	0.00104192	0.152876	1	-0.000865801	-0.00210707	0.000375463	0	0	0	0	0	0	0	0	1	0	0	0	0	0	0	0	1	2	0	0	2
Pseudoflavonifractor	0.00620848	0.0111174	0.159634	1	-0.00490896	-0.0119804	0.00216246	7	0	0	0	7	5	5	4	1	1	5	5	3	6	7	4	10	3	14	3	1
Anaerotruncus	0.00133965	0.00431948	0.163497	1	-0.00297982	-0.00737073	0.00141109	3	0	0	0	0	1	0	3	1	0	0	8	2	0	1	2	0	1	0	9	1
Sphingobacterium	0.000359337	0	0.166982	1	0.000359337	-0.000177886	0.00089656	0	0	0	0	0	0	0	0	1	1	0	0	0	0	0	0	0	0	0	0	0
Candidatus Solibacter	0.000337796	0	0.167054	1	0.000337796	-0.000167317	0.000842908	0	1	0	1	0	0	0	0	0	0	0	0	0	0	0	0	0	0	0	0	0
Gp18	0	0.000359341	0.167905	1	-0.000359341	-0.000901342	0.00018266	0	0	0	0	0	0	0	0	0	0	0	0	0	1	1	0	0	0	0	0	0
Syntrophomonas	0	0.000359341	0.167905	1	-0.000359341	-0.000901342	0.00018266	0	0	0	0	0	0	0	0	0	0	0	0	0	1	1	0	0	0	0	0	0
Tissierella	0.000745518	0	0.168009	1	0.000745518	-0.000372035	0.00186307	0	0	0	0	0	2	2	0	0	0	0	0	0	0	0	0	0	0	0	0	0
Tannerella	0	0.000334575	0.168095	1	-0.000334575	-0.000839473	0.000170322	0	0	0	0	0	0	0	0	0	0	0	1	1	0	0	0	0	0	0	0	0
Caryophanon	0	0.000369787	0.169241	1	-0.000369787	-0.000929497	0.000189923	0	0	0	0	0	0	0	0	0	0	0	0	0	0	0	0	0	1	0	0	1
Caldilinea	0	0.000367591	0.169484	1	-0.000367591	-0.00092433	0.000189148	0	0	0	0	0	0	0	0	0	0	0	0	0	0	0	0	0	0	1	0	1
Rhodoplanes	0.000357245	0	0.169644	1	0.000357245	-0.000180545	0.000895035	0	0	1	0	1	0	0	0	0	0	0	0	0	0	0	0	0	0	0	0	0
Faecalicoccus	0.0907407	0.0569565	0.176107	1	0.0337841	-0.0166823	0.0842505	32	104	45	82	43	3	12	106	3	63	47	62	16	4	83	35	3	27	24	37	26
Hungatella	0.00182579	0.00427193	0.183697	1	-0.00244614	-0.00622693	0.00133465	0	1	1	0	1	2	2	0	0	3	0	1	10	0	1	2	1	2	0	4	2
Alcanivorax	0.000546269	0	0.18371	1	0.000546269	-0.00030596	0.0013985	0	0	0	0	0	1	2	0	0	0	0	0	0	0	0	0	0	0	0	0	0
Ignavibacterium	0.000826312	0	0.184732	1	0.000826312	-0.0004661	0.00211872	0	0	0	0	0	0	0	2	3	0	0	0	0	0	0	0	0	0	0	0	0
Acetatifactor	0.0155801	0.00942176	0.190988	1	0.00615833	-0.00336018	0.0156768	17	13	8	21	8	2	3	9	0	3	8	8	0	0	8	5	0	12	1	12	6
Pseudoxanthomonas	0.000523137	0	0.191165	1	0.000523137	-0.000308222	0.0013545	0	0	0	0	0	0	2	0	1	0	0	0	0	0	0	0	0	0	0	0	0
Actinomyces	0.000877929	0.000168566	0.191396	1	0.000709364	-0.000405262	0.00182399	0	0	1	0	0	0	0	0	2	2	0	0	0	0	0	0	0	0	1	0	0
Clostridium XlVa	1.29051	2.48799	0.193123	1	-1.19748	-3.09611	0.701146	721	197	1537	303	1400	144	520	751	61	904	961	5501	2143	271	413	1179	121	1720	947	1709	270
Aliifodinibius	0	0.000591499	0.195311	1	-0.000591499	-0.00154793	0.000364927	0	0	0	0	0	0	0	0	0	0	0	0	0	0	0	0	0	0	0	1	2
Azospira	0	0.000522504	0.196681	1	-0.000522504	-0.00137022	0.000325212	0	0	0	0	0	0	0	0	0	0	0	0	0	0	2	0	0	0	1	0	0
Streptococcus	6.96499	11.6112	0.197044	1	-4.64618	-11.9378	2.64548	444	6394	602	2500	502	11091	7223	3419	2864	2270	1763	3414	3886	6729	10310	2293	7996	307	14927	2835	6798
Flavobacterium	0.000176116	0.0018933	0.198895	1	-0.00171718	-0.00451028	0.00107591	0	0	0	0	0	0	0	0	1	0	0	0	0	0	0	0	0	0	3	1	6
Murimonas	0.0012097	0.000367591	0.199131	1	0.000842107	-0.000500084	0.0021843	2	0	0	3	1	0	1	0	0	0	0	0	0	0	0	0	0	0	1	0	1
Holdemanella	0.303455	0.218645	0.201068	1	0.0848108	-0.0492656	0.218887	62	143	183	91	155	261	144	247	263	104	88	81	15	192	247	165	114	70	179	28	50
Gp6	0.000569342	0	0.201162	1	0.000569342	-0.000357749	0.00149643	0	1	0	0	2	0	0	0	0	0	0	0	0	0	0	0	0	0	0	0	0
Georgenia	0	0.000684926	0.222038	1	-0.000684926	-0.001866	0.000496146	0	0	0	0	0	0	0	0	0	0	0	0	1	0	0	0	0	3	0	0	0
Olsenella	0.403143	0.226807	0.223986	1	0.176335	-0.11814	0.47081	45	155	361	323	53	480	27	43	227	514	41	74	27	105	280	56	265	23	215	22	30
Slackia	0.0688652	0.042608	0.224345	1	0.0262572	-0.0175429	0.0700572	17	16	47	65	13	86	4	15	34	58	36	8	3	28	55	22	18	15	74	3	3
Flavonifractor	0.135384	0.191074	0.22493	1	-0.0556897	-0.149547	0.0381676	140	87	28	50	89	69	98	114	18	59	26	205	245	18	59	99	49	68	92	148	60
Caulobacter	0.00037261	0.00294077	0.22585	1	-0.00256816	-0.00702537	0.00188905	0	1	0	0	0	1	0	0	0	0	0	0	0	0	0	0	0	0	0	8	7
Mogibacterium	0.0154053	0.0254944	0.227467	1	-0.0100891	-0.0270202	0.00684199	12	36	11	4	5	3	3	5	0	10	0	18	15	2	13	14	12	10	10	35	4
Acholeplasma	0.000771256	0	0.231579	1	0.000771256	-0.000577941	0.00212045	0	0	0	0	0	3	1	0	0	0	0	0	0	0	0	0	0	0	0	0	0
Thiothrix	0	0.00442664	0.231818	1	-0.00442664	-0.0122366	0.00338328	0	0	0	0	0	0	0	0	0	0	0	0	0	0	0	0	0	20	6	0	0
Heliobacillus	0	0.000781656	0.232706	1	-0.000781656	-0.00216358	0.000600268	0	0	0	0	0	0	0	0	0	0	0	0	0	0	1	0	2	0	0	0	0
Faecalibacterium	0.452831	0.312101	0.238514	1	0.14073	-0.101536	0.382996	214	45	567	71	164	391	336	142	352	167	149	89	22	267	451	113	141	251	187	69	65
Sphingosinicella	0.000831098	0	0.238671	1	0.000831098	-0.000646658	0.00230885	0	1	0	4	0	0	0	0	0	0	0	0	0	0	0	0	0	0	0	0	0
Methyloversatilis	0	0.000851233	0.240793	1	-0.000851233	-0.00238456	0.000682091	0	0	0	0	0	0	0	0	0	0	0	0	0	0	1	0	0	0	4	0	0
Weissella	0.000867734	0.00343183	0.245647	1	-0.0025641	-0.00719717	0.00206897	2	2	0	0	0	0	0	0	1	0	0	2	0	1	4	0	0	12	1	0	0
Pseudomonas	0.000744543	0.00224824	0.247751	1	-0.00150369	-0.00420818	0.0012008	1	0	0	0	2	0	0	0	1	0	0	0	0	0	1	0	1	0	0	4	5
Catenisphaera	0.000875667	0.000332698	0.251232	1	0.000542969	-0.000425237	0.00151118	2	0	0	0	1	0	1	0	0	0	1	1	0	0	0	0	0	1	0	0	0
Tistrella	0.000970504	0	0.252141	1	0.000970504	-0.000808728	0.00274974	0	0	0	0	0	4	1	0	0	0	0	0	0	0	0	0	0	0	0	0	0
Cetobacterium	0	0.00116627	0.2579	1	-0.00116627	-0.00335063	0.00101809	0	0	0	0	0	0	0	0	0	0	0	0	0	0	0	0	0	0	0	5	1
Plesiomonas	0	0.00116627	0.2579	1	-0.00116627	-0.00335063	0.00101809	0	0	0	0	0	0	0	0	0	0	0	0	0	0	0	0	0	0	0	5	1
Clostridium IV	1.18779	1.55043	0.262421	1	-0.362642	-1.02362	0.298337	679	436	577	595	969	712	420	1411	178	500	412	1393	1539	499	345	542	326	1536	1324	750	362
Macellibacteroides	0.0315866	0.096505	0.264431	1	-0.0649184	-0.187802	0.057965	46	2	16	10	36	15	24	7	0	12	10	356	26	5	20	14	3	17	56	36	35
Butyricimonas	0.000352231	0.0012034	0.264533	1	-0.000851166	-0.0024213	0.00071897	0	0	0	0	0	0	0	0	2	0	0	0	0	3	2	0	1	0	0	0	0
Fibrobacter	0.00520415	0.011688	0.268762	1	-0.00648383	-0.0185351	0.00556747	14	11	0	1	2	0	1	1	0	0	0	26	0	4	0	6	0	4	2	4	19
Corynebacterium	0.598959	0.954058	0.275867	1	-0.355099	-1.01967	0.309476	218	291	248	10	146	386	70	36	1588	95	310	680	735	210	404	136	655	780	908	239	252
Rhodopirellula	0	0.00173231	0.286075	1	-0.00173231	-0.00518785	0.00172323	0	0	0	0	0	0	0	0	0	0	0	0	0	0	0	1	0	9	0	0	0
Novosphingobium	0.00151237	0.00075869	0.28699	1	0.000753682	-0.00070247	0.00220983	0	0	2	0	1	0	0	1	3	0	2	0	0	0	0	1	0	1	0	1	1
Ruminococcus	0.703777	1.01714	0.28869	1	-0.313367	-0.914373	0.28764	360	38	157	360	1064	168	155	858	47	284	576	1654	366	544	286	421	239	811	457	600	252
Subdoligranulum	0.000199248	0.000632844	0.292258	1	-0.000433596	-0.00128147	0.000414273	0	0	0	0	0	1	0	0	0	0	0	1	0	0	0	0	1	0	1	0	0
Mesorhizobium	0.000630581	0.00172806	0.292349	1	-0.00109748	-0.00327564	0.00108069	0	1	1	0	0	0	0	2	0	0	0	0	0	0	4	0	0	4	2	0	0
Catenibacterium	0.269816	0.160929	0.298137	1	0.108887	-0.104492	0.322266	16	79	66	286	29	256	36	376	362	53	21	56	10	101	99	51	221	29	161	10	17
Butyrivibrio	0.00467536	0.0123161	0.298888	1	-0.00764069	-0.0231619	0.00788047	1	1	7	0	1	8	0	5	1	1	2	4	0	1	40	1	1	2	5	11	3
Terrisporobacter	2.74173	3.76005	0.300124	1	-1.01832	-3.0333	0.996661	1935	1140	409	670	1860	1543	316	2368	937	1036	3748	2147	732	1044	4311	1199	1541	3193	4539	1169	482
Sphaerochaeta	0.0568492	0.0281199	0.309245	1	0.0287293	-0.0305432	0.0880018	165	29	14	13	27	9	9	37	1	13	14	8	23	5	15	8	5	28	10	37	13
Succinivibrio	0.00766778	0.0125004	0.313718	1	-0.00483259	-0.0146854	0.00502018	5	0	7	1	5	6	0	2	0	14	3	20	5	2	17	8	8	3	2	1	0
Paludibacter	0.0109754	0.00356387	0.325134	1	0.00741152	-0.00837718	0.0232002	20	3	0	1	33	0	0	1	0	0	1	10	0	0	0	5	0	0	0	5	0
Clostridium III	0.0066712	0.0113362	0.327456	1	-0.00466499	-0.0145145	0.00518453	3	2	0	4	8	8	1	1	0	9	0	8	26	2	3	6	0	7	2	7	3
Kandleria	0.000547616	0.00117783	0.329682	1	-0.000630212	-0.00197161	0.000711188	0	0	0	0	1	0	1	0	1	0	0	0	0	0	0	0	1	1	3	0	1
Ezakiella	0.0137041	0.00195246	0.333742	1	0.0117517	-0.0139644	0.0374677	8	2	73	0	0	0	0	0	2	0	0	0	0	0	0	3	0	8	0	0	0
Roseburia	0.434715	0.592986	0.33833	1	-0.158271	-0.497604	0.181061	254	14	216	81	474	100	291	378	107	135	481	541	46	531	642	379	111	519	459	33	35
Catellicoccus	0.00017351	0	0.340893	1	0.00017351	-0.000213095	0.000560116	0	0	0	0	0	0	1	0	0	0	0	0	0	0	0	0	0	0	0	0	0
Anaerophaga	0.000172447	0	0.340893	1	0.000172447	-0.000211789	0.000556684	1	0	0	0	0	0	0	0	0	0	0	0	0	0	0	0	0	0	0	0	0
Povalibacter	0.000172447	0	0.340893	1	0.000172447	-0.000211789	0.000556684	1	0	0	0	0	0	0	0	0	0	0	0	0	0	0	0	0	0	0	0	0
Delftia	0.000172447	0	0.340893	1	0.000172447	-0.000211789	0.000556684	1	0	0	0	0	0	0	0	0	0	0	0	0	0	0	0	0	0	0	0	0
Thermomarinilinea	0.000344895	0	0.340893	1	0.000344895	-0.000423579	0.00111337	2	0	0	0	0	0	0	0	0	0	0	0	0	0	0	0	0	0	0	0	0
Anaerobiospirillum	0.000159255	0	0.340893	0.952951	0.000159255	-0.000195587	0.000514097	0	0	1	0	0	0	0	0	0	0	0	0	0	0	0	0	0	0	0	0	0
Methanothrix	0.000148982	0	0.340893	0.982731	0.000148982	-0.000182971	0.000480936	0	0	0	0	0	0	0	1	0	0	0	0	0	0	0	0	0	0	0	0	0
Murdochiella	0.000159255	0	0.340893	0.931775	0.000159255	-0.000195587	0.000514097	0	0	1	0	0	0	0	0	0	0	0	0	0	0	0	0	0	0	0	0	0
Stappia	0.00104106	0	0.340893	1	0.00104106	-0.00127857	0.0033607	0	0	0	0	0	0	6	0	0	0	0	0	0	0	0	0	0	0	0	0	0
Halomonas	0.000597745	0	0.340893	1	0.000597745	-0.000734114	0.0019296	0	0	0	0	0	3	0	0	0	0	0	0	0	0	0	0	0	0	0	0	0
Megamonas	0.000199248	0	0.340893	1	0.000199248	-0.000244705	0.000643202	0	0	0	0	0	1	0	0	0	0	0	0	0	0	0	0	0	0	0	0	0
Dokdonella	0.00019799	0	0.340893	1	0.00019799	-0.000243159	0.000639139	0	0	0	0	1	0	0	0	0	0	0	0	0	0	0	0	0	0	0	0	0
Steroidobacter	0.000173362	0	0.340893	0.967612	0.000173362	-0.000212912	0.000559635	0	1	0	0	0	0	0	0	0	0	0	0	0	0	0	0	0	0	0	0	0
Hyphomicrobium	0.00019799	0	0.340893	0.924923	0.00019799	-0.000243159	0.000639139	0	0	0	0	1	0	0	0	0	0	0	0	0	0	0	0	0	0	0	0	0
Phaeodactylibacter	0.00039598	0	0.340893	1	0.00039598	-0.000486318	0.00127828	0	0	0	0	2	0	0	0	0	0	0	0	0	0	0	0	0	0	0	0	0
Subdivision3_genera_incertae_sedis	0.000164434	0	0.340893	0.960226	0.000164434	-0.000201948	0.000530816	0	0	0	1	0	0	0	0	0	0	0	0	0	0	0	0	0	0	0	0	0
Denitratisoma	0.00019799	0	0.340893	0.975113	0.00019799	-0.000243159	0.000639139	0	0	0	0	1	0	0	0	0	0	0	0	0	0	0	0	0	0	0	0	0
Acidaminobacter	0.000173362	0	0.340893	1	0.000173362	-0.000212912	0.000559635	0	1	0	0	0	0	0	0	0	0	0	0	0	0	0	0	0	0	0	0	0
Fontibacter	0.000520531	0	0.340893	1	0.000520531	-0.000639285	0.00168035	0	0	0	0	0	0	3	0	0	0	0	0	0	0	0	0	0	0	0	0	0
Aquisphaera	0.000159272	0	0.340893	1	0.000159272	-0.000195608	0.000514151	0	0	0	0	0	0	0	0	0	0	1	0	0	0	0	0	0	0	0	0	0
Acetoanaerobium	0.000297965	0	0.340893	0.990469	0.000297965	-0.000365942	0.000961872	0	0	0	0	0	0	0	2	0	0	0	0	0	0	0	0	0	0	0	0	0
Stackebrandtia	0.000346723	0	0.340893	0.99833	0.000346723	-0.000425824	0.00111927	0	2	0	0	0	0	0	0	0	0	0	0	0	0	0	0	0	0	0	0	0
Gp1	0.000159255	0	0.340893	0.945786	0.000159255	-0.000195587	0.000514097	0	0	1	0	0	0	0	0	0	0	0	0	0	0	0	0	0	0	0	0	0
Moraxella	0.00123281	0	0.340893	1	0.00123281	-0.00151406	0.00397968	0	0	0	0	0	0	0	0	7	0	0	0	0	0	0	0	0	0	0	0	0
Hyphomonas	0.000176116	0	0.340893	0.938728	0.000176116	-0.000216294	0.000568525	0	0	0	0	0	0	0	0	1	0	0	0	0	0	0	0	0	0	0	0	0
Nitrincola	0.000796994	0	0.340893	1	0.000796994	-0.000978819	0.00257281	0	0	0	0	0	4	0	0	0	0	0	0	0	0	0	0	0	0	0	0	0
Lachnospira	0	0.000168566	0.343436	0.862095	-0.000168566	-0.000549888	0.000212757	0	0	0	0	0	0	0	0	0	0	0	0	0	0	0	0	0	0	1	0	0
Simplicispira	0	0.000168566	0.343436	0.911712	-0.000168566	-0.000549888	0.000212757	0	0	0	0	0	0	0	0	0	0	0	0	0	0	0	0	0	0	1	0	0
Parcubacteria_genera_incertae_sedis	0	0.000176969	0.343436	0.892451	-0.000176969	-0.000577301	0.000223363	0	0	0	0	0	0	0	0	0	0	0	0	0	0	1	0	0	0	0	0	0
Erythrobacter	0	0.000302343	0.343436	0.925022	-0.000302343	-0.000986291	0.000381605	0	0	0	0	0	0	0	0	0	0	0	0	0	0	0	0	1	0	0	0	0
Adlercreutzia	0	0.00019345	0.343436	0.79205	-0.00019345	-0.000631064	0.000244164	0	0	0	0	0	0	0	0	0	0	0	0	0	0	0	0	0	0	0	1	0
Armatimonadetes_gp5	0	0.000195454	0.343436	0.88621	-0.000195454	-0.000637601	0.000246693	0	0	0	0	0	0	0	0	0	0	0	0	0	0	0	1	0	0	0	0	0
Rhizobium	0	0.000199025	0.343436	0.850524	-0.000199025	-0.00064925	0.000251201	0	0	0	0	0	0	0	0	0	0	0	0	0	0	0	0	0	0	0	0	1
Candidatus Cloacamonas	0	0.000364744	0.343436	0.880056	-0.000364744	-0.00118985	0.000460364	0	0	0	0	0	0	0	0	0	0	0	0	0	2	0	0	0	0	0	0	0
Azoarcus	0	0.000505698	0.343436	0.9052	-0.000505698	-0.00164966	0.00063827	0	0	0	0	0	0	0	0	0	0	0	0	0	0	0	0	0	0	3	0	0
Ohtaekwangia	0	0.000505698	0.343436	0.89878	-0.000505698	-0.00164966	0.00063827	0	0	0	0	0	0	0	0	0	0	0	0	0	0	0	0	0	0	3	0	0
Xanthobacter	0	0.000199025	0.343436	0.844854	-0.000199025	-0.00064925	0.000251201	0	0	0	0	0	0	0	0	0	0	0	0	0	0	0	0	0	0	0	0	1
Gp3	0	0.000199025	0.343436	0.85627	-0.000199025	-0.00064925	0.000251201	0	0	0	0	0	0	0	0	0	0	0	0	0	0	0	0	0	0	0	0	1
Sandarakinorhabdus	0	0.000390907	0.343436	0.833737	-0.000390907	-0.0012752	0.000493387	0	0	0	0	0	0	0	0	0	0	0	0	0	0	0	2	0	0	0	0	0
Candidatus Hydrogenedens	0	0.000176969	0.343436	0.822909	-0.000176969	-0.000577301	0.000223363	0	0	0	0	0	0	0	0	0	0	0	0	0	0	1	0	0	0	0	0	0
Succiniclasticum	0	0.000161935	0.343436	0.828288	-0.000161935	-0.000528259	0.000204388	0	0	0	0	0	0	0	0	0	0	0	1	0	0	0	0	0	0	0	0	0
Robinsoniella	0	0.00019345	0.343436	0.802076	-0.00019345	-0.000631064	0.000244164	0	0	0	0	0	0	0	0	0	0	0	0	0	0	0	0	0	0	0	1	0
Brachymonas	0	0.000182372	0.343436	0.8176	-0.000182372	-0.000594926	0.000230182	0	0	0	0	0	0	0	0	0	0	0	0	0	1	0	0	0	0	0	0	0
Bradyrhizobium	0	0.000195454	0.343436	0.868	-0.000195454	-0.000637601	0.000246693	0	0	0	0	0	0	0	0	0	0	0	0	0	0	0	1	0	0	0	0	0
Tepidisphaera	0	0.000199025	0.343436	0.787131	-0.000199025	-0.00064925	0.000251201	0	0	0	0	0	0	0	0	0	0	0	0	0	0	0	0	0	0	0	0	1
Roseimicrobium	0	0.000337132	0.343436	0.873986	-0.000337132	-0.00109978	0.000425513	0	0	0	0	0	0	0	0	0	0	0	0	0	0	0	0	0	0	2	0	0
Aestuariispira	0	0.000195454	0.343436	0.918319	-0.000195454	-0.000637601	0.000246693	0	0	0	0	0	0	0	0	0	0	0	0	0	0	0	1	0	0	0	0	0
Lachnoanaerobaculum	0	0.000161935	0.343436	0.797032	-0.000161935	-0.000528259	0.000204388	0	0	0	0	0	0	0	0	0	0	0	1	0	0	0	0	0	0	0	0	0
Empedobacter	0	0.000199025	0.343436	0.812359	-0.000199025	-0.00064925	0.000251201	0	0	0	0	0	0	0	0	0	0	0	0	0	0	0	0	0	0	0	0	1
Nitrospira	0	0.000161935	0.343436	0.807185	-0.000161935	-0.000528259	0.000204388	0	0	0	0	0	0	0	0	0	0	0	1	0	0	0	0	0	0	0	0	0
Filomicrobium	0	0.00039805	0.343436	0.839258	-0.00039805	-0.0012985	0.000502401	0	0	0	0	0	0	0	0	0	0	0	0	0	0	0	0	0	0	0	0	2
Pseudaminobacter	0	0.000341524	0.343436	0.782272	-0.000341524	-0.00111411	0.000431057	0	0	0	0	0	0	0	0	0	0	0	0	0	0	0	0	0	2	0	0	0
Blastopirellula	0	0.000341524	0.343436	0.763422	-0.000341524	-0.00111411	0.000431057	0	0	0	0	0	0	0	0	0	0	0	0	0	0	0	0	0	2	0	0	0
Roseomonas	0	0.000170762	0.343436	0.75885	-0.000170762	-0.000557053	0.000215529	0	0	0	0	0	0	0	0	0	0	0	0	0	0	0	0	0	1	0	0	0
Aerococcus	0	0.000341524	0.343436	0.777473	-0.000341524	-0.00111411	0.000431057	0	0	0	0	0	0	0	0	0	0	0	0	0	0	0	0	0	2	0	0	0
Pusillimonas	0	0.000170762	0.343436	0.772732	-0.000170762	-0.000557053	0.000215529	0	0	0	0	0	0	0	0	0	0	0	0	0	0	0	0	0	1	0	0	0
Kitasatospora	0	0.00017264	0.343436	0.768049	-0.00017264	-0.000563179	0.000217899	0	0	0	0	0	0	0	0	0	0	0	0	1	0	0	0	0	0	0	0	0
Ornithinimicrobium	0.00228429	0.000369787	0.348502	0.765459	0.00191451	-0.00241048	0.00623949	0	0	0	0	0	0	2	0	11	0	0	0	0	0	0	0	0	1	0	0	1
Actinobacillus	0.00155903	0.00051009	0.350389	0.76505	0.00104894	-0.00129666	0.00339454	6	0	0	0	0	1	0	1	1	0	0	0	0	0	0	0	0	2	1	0	0
Nocardiopsis	0.000349477	0.00120475	0.352558	0.765257	-0.000855271	-0.00280366	0.00109311	0	1	0	0	0	0	0	0	1	0	0	0	0	1	0	0	0	5	1	0	0
Atopostipes	0.00474151	0.000836157	0.357555	0.771566	0.00390535	-0.00508604	0.0128968	3	0	0	0	0	0	1	0	23	0	0	2	0	0	0	0	0	3	0	0	0
Anaerostipes	0.0356178	0.019913	0.359565	0.771393	0.0157048	-0.0193426	0.0507522	2	0	66	11	15	55	1	9	9	8	28	13	2	60	19	1	0	5	9	1	2
Malikia	0.000767332	0.000170762	0.359778	0.767389	0.00059657	-0.000771924	0.00196506	0	1	0	0	3	0	0	0	0	0	0	0	0	0	0	0	0	1	0	0	0
Guggenheimella	0.0278158	0.00204442	0.363621	0.771128	0.0257714	-0.0345429	0.0860857	0	0	0	0	0	0	4	0	154	0	0	0	0	0	0	0	2	5	0	2	1
Sporobacter	1.98197	1.32204	0.368337	0.776664	0.659931	-0.871514	2.19138	3280	396	790	847	2887	1068	455	347	32	304	667	838	1056	275	468	1065	118	1446	548	1189	291
Akkermansia	0.00241793	0.0423867	0.368512	0.772619	-0.0399688	-0.135421	0.0554838	13	0	0	0	0	0	0	0	1	0	0	0	0	0	0	0	0	0	0	1	212
Hydrogenoanaerobacterium	0.00367079	0.00501903	0.368519	0.768268	-0.00134824	-0.00441973	0.00172325	6	2	2	1	3	2	1	2	0	1	1	7	5	1	1	0	1	4	3	4	2
Fastidiosipila	0.00816425	0.00141705	0.370951	0.768994	0.0067472	-0.00924649	0.0227409	0	0	0	0	1	2	2	0	41	0	0	0	0	0	0	0	0	6	0	1	1
Alloiococcus	0.00228583	0.000302343	0.3717	0.766241	0.00198349	-0.00272549	0.00669247	1	0	0	0	0	0	0	0	12	0	0	0	0	0	0	0	1	0	0	0	0
Stenotrophomonas	0.000176116	0.000585924	0.380936	0.780919	-0.000409809	-0.00139039	0.000570771	0	0	0	0	0	0	0	0	1	0	0	0	0	0	0	0	0	0	0	2	1
Helcococcus	0.0227391	0.0040488	0.383767	0.782375	0.0186903	-0.0269755	0.0643561	0	0	0	0	0	2	10	0	117	0	0	0	0	2	2	0	2	9	0	1	5
Intestinimonas	0.254679	0.348565	0.385999	0.782602	-0.0938858	-0.321277	0.133505	177	166	67	168	105	73	202	308	20	94	126	136	90	84	62	85	307	202	532	150	111
Coprococcus	0.429982	0.345326	0.386725	0.77979	0.0846561	-0.115343	0.284655	174	87	400	147	152	84	304	178	176	376	446	133	45	415	106	123	170	287	250	204	78
Butyricicoccus	0.543534	0.796444	0.389052	0.780218	-0.252911	-0.867707	0.361885	291	4	317	30	310	581	279	217	576	201	258	206	22	1349	1087	201	272	397	646	35	80
Rummeliibacillus	0.000346723	0.00375677	0.389235	0.776366	-0.00341004	-0.0119228	0.00510272	0	2	0	0	0	0	0	0	0	0	0	0	0	0	0	0	0	22	0	0	0
Fusicatenibacter	0.00625209	0.0102417	0.390387	0.774477	-0.00398966	-0.0135861	0.00560677	0	1	4	2	2	3	1	0	12	10	0	0	0	7	11	1	9	3	19	2	0
Vasilyevaea	0.000173362	0.000540549	0.391313	0.772164	-0.000367187	-0.00126306	0.000528683	0	1	0	0	0	0	0	0	0	0	0	0	0	0	0	0	0	2	0	0	1
Porphyromonas	0.000519171	0.00229606	0.391676	0.768768	-0.00177689	-0.00621345	0.00265967	1	2	0	0	0	0	0	0	0	0	0	0	0	0	0	10	0	2	0	0	0
Collinsella	0.464699	0.362541	0.392435	0.766183	0.102158	-0.143973	0.34829	81	548	219	195	109	492	240	227	328	151	52	247	72	116	284	118	180	128	416	255	100
Anaerocella	0.349291	0.17303	0.39267	0.762607	0.176261	-0.252455	0.604977	219	239	3	11	871	0	522	15	0	0	16	494	15	2	0	190	0	2	49	43	181
Comamonas	0.00059397	0.00158399	0.393264	0.759762	-0.000990023	-0.00338861	0.00140856	0	0	0	0	3	0	0	0	0	0	0	0	0	0	5	0	0	0	3	1	0
Methanobrevibacter	0.115484	0.198309	0.398931	0.766695	-0.0828258	-0.284138	0.118487	14	302	5	261	0	5	51	41	4	1	1	64	113	18	35	16	157	84	51	385	55
Trueperella	0.0222993	0.00501817	0.406025	0.776286	0.0172811	-0.0269058	0.061468	2	2	2	0	0	0	8	0	113	0	0	1	0	0	0	0	3	19	3	0	1
Nosocomiicoccus	0.00868855	0.0035593	0.406595	0.773369	0.00512925	-0.00787653	0.018135	7	1	0	0	5	0	2	0	33	0	1	8	8	0	0	0	1	0	0	3	0
Paracoccus	0.00136437	0.00067646	0.407278	0.770695	0.00068791	-0.00101254	0.00238836	0	3	0	0	0	0	1	0	2	0	2	0	0	0	0	0	0	1	3	0	0
Brachybacterium	0.00210818	0.00474265	0.410829	0.773449	-0.00263447	-0.00924323	0.0039743	0	0	0	0	0	0	2	0	10	0	0	1	0	0	0	0	7	11	0	2	1
Thermomonas	0.000332782	0.000737378	0.412868	0.773342	-0.000404595	-0.00143399	0.000624798	0	0	0	0	0	0	1	0	0	0	1	0	0	0	0	0	0	1	1	0	2
Oribacterium	0.195144	0.310899	0.418177	0.77933	-0.115755	-0.40912	0.17761	14	7	235	17	74	463	95	146	1	17	18	182	54	112	632	281	75	25	290	13	33
Subdivision5_genera_incertae_sedis	0.116566	0.196673	0.41957	0.777996	-0.0801071	-0.28477	0.124556	54	277	1	8	12	38	10	265	0	16	23	538	154	10	26	87	67	60	23	93	36
Brevibacterium	0.01279	0.0243595	0.420353	0.775552	-0.0115696	-0.0409764	0.0178372	6	1	1	0	1	0	5	0	57	0	2	5	3	3	0	1	28	42	29	5	4
Oligosphaera	0.000172447	0.000507215	0.421745	0.774249	-0.000334768	-0.00120705	0.000537514	1	0	0	0	0	0	0	0	0	0	0	1	2	0	0	0	0	0	0	0	0
Kurthia	0.000525742	0.00141705	0.426909	0.779848	-0.000891306	-0.00326129	0.00147868	0	0	0	0	0	0	1	0	2	0	0	0	0	0	0	0	0	6	0	1	1
Alistipes	0.0101789	0.0179856	0.433059	0.787186	-0.00780668	-0.0287729	0.0131595	9	0	0	20	8	0	1	15	0	3	5	53	1	0	8	26	1	3	2	2	6
Chlamydia	0.0497176	0.0265009	0.435746	0.788188	0.0232168	-0.039868	0.0863016	59	3	23	0	0	141	1	5	27	0	10	29	35	4	8	24	16	12	4	5	2
Pseudocitrobacter	0.000342477	0.000678165	0.443303	0.797946	-0.000335688	-0.0012424	0.000571022	0	0	1	0	0	0	0	0	0	1	0	0	0	1	0	0	1	0	0	1	0
Arcanobacterium	0.000880578	0.000170762	0.445857	0.794789	0.000709816	-0.00127006	0.00268969	0	0	0	0	0	0	0	0	5	0	0	0	0	0	0	0	0	1	0	0	0
Petrimonas	0.000880578	0.000170762	0.445857	0.798647	0.000709816	-0.00127006	0.00268969	0	0	0	0	0	0	0	0	5	0	0	0	0	0	0	0	0	1	0	0	0
Arthrobacter	0.00442476	0.00102457	0.449078	0.796682	0.00340019	-0.00612159	0.012922	0	0	0	0	1	0	0	0	24	0	0	0	0	0	0	0	0	6	0	0	0
Facklamia	0.00539479	0.00206649	0.460369	0.812805	0.0033283	-0.0061709	0.0128275	1	0	2	0	0	1	0	0	24	0	3	0	0	0	0	0	1	8	0	0	2
Intestinibacter	0.00522282	0.00202402	0.467816	0.822019	0.00319881	-0.00612024	0.0125179	1	0	0	0	1	21	1	0	1	0	2	0	0	2	1	0	1	0	7	0	0
Catabacter	0.00307415	0.00196546	0.469158	0.820471	0.00110869	-0.00206162	0.004279	0	2	0	0	6	2	4	3	0	0	0	2	0	1	0	0	0	0	4	2	2
Clostridium sensu stricto	0.498553	0.61455	0.47189	0.821357	-0.115996	-0.448112	0.216119	652	342	81	157	96	164	394	443	161	145	296	285	114	141	721	234	344	687	284	201	209
Anaerococcus	0.0276516	0.00918286	0.473851	0.820897	0.0184687	-0.0364079	0.0733453	1	2	7	1	0	1	2	1	140	1	2	3	0	2	1	2	5	31	1	1	3
Desulfovibrio	0.00506957	0.00339704	0.494891	0.853339	0.00167253	-0.00336428	0.00670935	5	1	0	0	0	3	1	2	11	3	3	2	0	0	2	6	4	0	2	0	0
Anaerosphaera	0.0033462	0.000946211	0.496575	0.852261	0.00239999	-0.00512613	0.0099261	0	0	0	0	0	0	0	0	19	0	0	0	0	0	0	0	2	2	0	0	0
Enterococcus	0.00918401	0.00610176	0.504888	0.862517	0.00308224	-0.00650279	0.0126673	0	0	2	0	0	0	1	18	14	15	5	5	1	0	2	7	0	13	0	3	3
Leucobacter	0.000548726	0.00104914	0.513162	0.872612	-0.000500413	-0.00211802	0.00111719	0	1	0	0	0	1	0	0	1	0	0	0	1	0	0	0	0	4	0	1	0
Peptoniphilus	0.00463346	0.00231067	0.513338	0.868907	0.0023228	-0.00521551	0.00986111	1	0	5	0	0	0	0	0	19	0	2	1	0	0	0	1	3	2	3	0	1
Devosia	0.000372759	0.000170762	0.514336	0.866622	0.000201997	-0.000437297	0.00084129	0	0	0	0	0	1	1	0	0	0	0	0	0	0	0	0	0	1	0	0	0
Ercella	0.00264173	0.000850931	0.516552	0.866398	0.0017908	-0.00412175	0.00770336	0	0	0	0	0	0	0	0	15	0	0	0	0	1	0	1	1	1	0	0	0
Yaniella	0.0015777	0.000706919	0.517111	0.863412	0.000870785	-0.00197436	0.00371593	2	0	0	0	0	0	0	0	7	0	0	0	0	0	0	0	0	1	2	0	1
Lysobacter	0.00123281	0.000392475	0.518778	0.862293	0.000840334	-0.00193672	0.00361739	0	0	0	0	0	0	0	0	7	0	0	0	0	0	0	0	0	0	0	1	1
Actinotalea	0.000172447	0.000369787	0.521976	0.863719	-0.000197339	-0.000835455	0.000440776	1	0	0	0	0	0	0	0	0	0	0	0	0	0	0	0	0	1	0	0	1
Saccharofermentans	0.005395	0.0139187	0.524387	0.863834	-0.0085237	-0.0371862	0.0201388	2	0	1	2	1	0	2	0	21	0	2	0	0	0	0	0	4	1	0	0	63
Finegoldia	0.00403013	0.00158424	0.525519	0.861852	0.00244589	-0.00579333	0.0106851	1	0	1	0	0	0	0	0	21	0	0	2	1	0	0	3	1	0	0	0	1
Defluviimonas	0.000346972	0.000161935	0.525909	0.858674	0.000185037	-0.000417103	0.000787177	0	0	0	0	1	0	0	1	0	0	0	1	0	0	0	0	0	0	0	0	0
Tessaracoccus	0.00264173	0.000883951	0.527813	0.857987	0.00175778	-0.00418602	0.00770158	0	0	0	0	0	0	0	0	15	0	0	0	1	0	0	0	0	3	0	0	1
Senegalimassilia	0.0879087	0.0601373	0.529129	0.856354	0.0277714	-0.0656279	0.121171	10	16	31	54	7	210	9	15	104	18	6	48	23	40	55	21	44	39	41	2	0
Methanomassiliicoccus	0.00050223	0.000875861	0.53119	0.855935	-0.000373631	-0.00160555	0.000858284	0	1	0	2	0	0	0	0	0	0	0	0	2	0	0	0	0	0	2	1	0
Ralstonia	0.000477765	0.000967493	0.534286	0.85718	-0.000489729	-0.0021157	0.00113624	0	0	3	0	0	0	0	0	0	0	0	0	0	0	1	0	0	0	0	1	3
Enterorhabdus	0.111824	0.076762	0.539175	0.86128	0.0350625	-0.0839982	0.154123	6	95	29	20	23	263	3	25	83	50	9	15	17	77	69	17	88	25	45	4	13
Nesterenkonia	0.000176116	0.000362016	0.542914	0.863514	-0.0001859	-0.000818005	0.000446204	0	0	0	0	0	0	0	0	1	0	0	0	0	0	0	0	0	0	1	1	0
Coprobacillus	0.000173362	0.000355385	0.544824	0.862833	-0.000182024	-0.000803906	0.000439859	0	1	0	0	0	0	0	0	0	0	0	1	0	0	0	0	0	0	0	1	0
unclassified	21.2267	23.3015	0.545731	0.860577	-2.07479	-9.14506	4.99547	15823	14723	12614	8546	15587	11311	5673	17929	3496	7897	9253	21894	14514	7416	14883	11225	7201	17340	11738	12951	7275
Klebsiella	0.00382965	0.00212795	0.546293	0.857796	0.0017017	-0.00411212	0.00751552	0	0	0	0	0	0	1	9	6	6	1	0	0	0	0	0	0	0	0	11	0
Rothia	0.000176116	0.000512286	0.547399	0.85589	-0.000336171	-0.00152699	0.000854651	0	0	0	0	0	0	0	0	1	0	0	0	0	0	0	0	0	3	0	0	0
Sanguibacter	0.000176116	0.000512286	0.547399	0.852279	-0.000336171	-0.00152699	0.000854651	0	0	0	0	0	0	0	0	1	0	0	0	0	0	0	0	0	3	0	0	0
Vampirovibrio	0.318626	0.37006	0.558676	0.866183	-0.0514341	-0.232404	0.129535	167	141	353	54	218	99	266	232	7	247	64	425	230	45	297	112	185	306	125	168	86
Globicatella	0.0131739	0.0057379	0.560788	0.865819	0.007436	-0.0196663	0.0345383	2	1	1	0	0	0	3	0	68	0	0	0	0	0	0	0	2	22	0	3	4
Salinicoccus	0.0070306	0.0116936	0.561532	0.863355	-0.00466303	-0.0212304	0.0119043	5	0	0	0	1	0	3	0	29	1	1	3	2	0	2	1	21	13	1	3	5
Acetivibrio	0.000370437	0.00019345	0.581605	0.890507	0.000176988	-0.000485051	0.000839026	1	0	0	0	1	0	0	0	0	0	0	0	0	0	0	0	0	0	0	1	0
Alloprevotella	0.0313015	0.037445	0.581919	0.887306	-0.00614357	-0.0292626	0.0169754	43	11	9	9	14	11	28	27	5	15	10	30	37	10	8	49	3	10	8	24	24
Pyramidobacter	0.000322493	0.000511968	0.58338	0.885873	-0.000189475	-0.000902189	0.000523239	0	0	0	0	0	0	1	1	0	0	0	0	1	0	0	0	0	1	1	0	0
Christensenella	0.00862282	0.00733006	0.584376	0.883749	0.00129276	-0.00364312	0.00622864	5	4	3	4	11	2	2	12	2	3	2	8	5	2	4	4	2	3	6	1	5
Bacteroides	0.0268067	0.019189	0.594008	0.894648	0.00761767	-0.022102	0.0373373	73	9	5	9	18	0	10	3	1	0	28	40	9	0	3	24	0	1	4	15	11
Pirellula	0.000653931	0.00153686	0.595391	0.893087	-0.000882928	-0.00444134	0.00267548	0	0	0	0	0	0	0	0	1	0	3	0	0	0	0	0	0	9	0	0	0
Staphylococcus	0.00566385	0.00757185	0.610045	0.911363	-0.001908	-0.00961254	0.00579655	2	9	0	1	12	1	4	1	1	0	0	4	15	1	1	4	1	9	0	7	0
Enteractinococcus	0.0019115	0.00303959	0.612486	0.91132	-0.00112809	-0.00576094	0.00350476	1	0	0	0	1	0	0	1	7	0	1	0	4	0	0	0	6	2	0	1	0
Brevundimonas	0.000682408	0.00039805	0.613398	0.909011	0.000284359	-0.000874728	0.00144345	0	0	0	0	0	0	2	0	1	0	1	0	0	0	0	0	0	0	0	0	2
Rhodobacter	0.000148982	0.000341524	0.614463	0.906948	-0.000192542	-0.00100184	0.000616759	0	0	0	0	0	0	0	1	0	0	0	0	0	0	0	0	0	2	0	0	0
Cellulosilyticum	0.00352289	0.00265709	0.626465	0.920978	0.000865806	-0.00279761	0.00452922	2	2	0	8	0	0	1	2	1	3	2	1	1	0	0	2	3	6	0	0	0
Phenylobacterium	0.00034055	0.00019345	0.628989	0.921019	0.0001471	-0.000480254	0.000774454	0	0	0	1	0	0	0	0	1	0	0	0	0	0	0	0	0	0	0	1	0
Anaerovorax	0.0782042	0.0925613	0.630634	0.919778	-0.0143571	-0.0758728	0.0471586	10	10	9	31	88	36	101	52	4	65	36	46	12	48	27	97	76	36	64	20	34
Fusobacterium	0.000148982	0.000323871	0.632091	0.918274	-0.000174888	-0.0009469	0.000597123	0	0	0	0	0	0	0	1	0	0	0	2	0	0	0	0	0	0	0	0	0
Roseibacillus	0.000159272	0.000341524	0.636814	0.921508	-0.000182253	-0.000997683	0.000633178	0	0	0	0	0	0	0	0	0	0	1	0	0	0	0	0	0	2	0	0	0
Oligella	0.000335387	0.00019345	0.638201	0.919907	0.000141937	-0.00048006	0.000763935	0	0	0	0	0	0	0	0	1	0	1	0	0	0	0	0	0	0	0	1	0
Holdemania	0.268703	0.29893	0.646975	0.928925	-0.0302272	-0.166468	0.106013	228	83	284	54	89	282	62	136	75	120	131	171	139	109	334	135	111	212	148	180	62
Anaerorhabdus	0.000346723	0.000554795	0.647325	0.925825	-0.000208072	-0.00114601	0.000729864	0	2	0	0	0	0	0	0	0	0	0	0	0	1	1	1	0	0	0	0	0
Paraprevotella	0.0386986	0.0470402	0.647418	0.922383	-0.00834156	-0.0459188	0.0292357	83	2	12	11	18	14	24	32	9	11	9	42	33	7	4	32	14	20	5	18	72
Youngiibacter	0.00158504	0.000803711	0.653489	0.927451	0.000781329	-0.00289432	0.00445698	0	0	0	0	0	0	0	0	9	0	0	0	0	0	0	0	2	0	0	0	1
Eubacterium	0.802036	0.669015	0.653931	0.924524	0.133021	-0.485436	0.751478	691	98	266	139	278	623	269	546	924	518	225	140	82	342	144	228	144	558	1643	142	284
Faecalitalea	0.00372332	0.0026118	0.661681	0.931909	0.00111152	-0.00412198	0.00634503	0	1	4	1	0	3	0	0	0	10	2	1	0	1	10	1	1	0	0	0	0
Asteroleplasma	0.00747061	0.0100382	0.669686	0.939597	-0.00256764	-0.0154217	0.0102864	4	2	3	4	4	10	1	11	1	2	1	3	0	3	33	2	3	6	5	0	0
Ornithinicoccus	0.000176116	0.000341524	0.673624	0.941542	-0.000165409	-0.00099208	0.000661262	0	0	0	0	0	0	0	0	1	0	0	0	0	0	0	0	0	2	0	0	0
Clostridium XI	0.150569	0.174531	0.690126	0.960968	-0.0239621	-0.152458	0.104533	51	62	113	87	32	122	81	44	101	49	130	95	24	76	181	38	192	166	28	32	22
Gordonia	0.000318543	0.00017264	0.692754	0.961	0.000145903	-0.000625158	0.000916965	0	0	0	0	0	0	0	0	0	0	2	0	1	0	0	0	0	0	0	0	0
Clostridium XlVb	0.0325641	0.0256837	0.693904	0.958991	0.00688034	-0.0294796	0.0432403	5	3	8	1	16	2	90	15	13	6	31	17	7	8	56	22	2	3	6	10	10
Terrimonas	0.000692781	0.000507894	0.695056	0.956999	0.000184888	-0.000790852	0.00116063	1	1	0	0	1	0	0	1	0	0	0	0	0	0	0	0	0	1	2	0	0
Syntrophococcus	0.000183222	0.000323871	0.710973	0.975275	-0.000140649	-0.000936869	0.00065557	0	0	0	0	0	0	0	0	0	1	0	2	0	0	0	0	0	0	0	0	0
Sutterella	0.00203285	0.00243167	0.733322	1	-0.000398822	-0.00281735	0.00201971	0	1	1	1	0	0	0	1	1	4	3	1	0	1	5	1	1	0	3	0	1
Gallicola	0.00140526	0.00186554	0.735355	1	-0.000460281	-0.00333196	0.0024114	1	0	0	0	0	0	0	0	7	0	0	1	1	1	0	0	1	2	3	0	1
Sphingomonas	0.000511157	0.000341524	0.739377	1	0.000169633	-0.000882121	0.00122139	0	2	0	1	0	0	0	0	0	0	0	0	0	0	0	0	0	2	0	0	0
Gemmiger	1.37425	1.50137	0.756975	1	-0.127124	-0.997654	0.743406	991	185	1204	726	863	918	506	938	615	470	530	497	124	895	2150	589	636	1314	1500	200	163
Millisia	0.00174657	0.00136475	0.759325	1	0.00038182	-0.00220638	0.00297002	0	1	1	0	1	0	0	0	6	0	1	0	0	0	0	0	2	0	1	1	2
Blautia	0.736638	0.66643	0.763675	1	0.0702083	-0.416139	0.556555	236	161	420	628	244	802	179	334	537	360	304	146	74	456	1086	147	420	401	598	69	82
Anaerosporobacter	0.001749	0.00214826	0.765153	1	-0.00039926	-0.00317282	0.0023743	1	3	0	1	1	0	4	0	0	0	0	2	1	0	6	2	0	0	0	0	1
Veillonella	0.000493877	0.000364212	0.769737	1	0.000129665	-0.000789486	0.00104882	2	0	0	0	0	0	0	1	0	0	0	0	0	0	0	0	0	1	0	1	0
Luteimonas	0.0058066	0.0041248	0.781308	1	0.0016818	-0.0110855	0.0144491	0	0	0	0	0	0	2	0	31	0	0	0	0	0	0	0	1	5	0	3	12
Aeromonas	0.0014829	0.00190711	0.784092	1	-0.000424211	-0.0036889	0.00284048	1	0	0	0	2	0	0	4	0	0	2	0	0	0	2	0	0	0	0	7	1
Mobiluncus	0.00353091	0.00256351	0.79139	1	0.000967397	-0.00668038	0.00861517	1	1	20	0	0	0	0	0	0	0	0	0	0	0	0	7	0	7	0	0	0
Lachnospiracea_incertae_sedis	5.68699	5.21415	0.794318	1	0.472838	-3.29686	4.24254	2930	8238	2359	7950	2398	1668	474	1461	600	3402	1473	1321	4268	2027	2107	3595	1435	1172	3274	6332	2047
Jeotgalicoccus	0.010552	0.0129319	0.813214	1	-0.00237991	-0.0231743	0.0184145	5	0	0	0	3	0	7	1	43	0	1	2	5	1	0	0	8	40	1	8	3
Nitrosomonas	0.00264041	0.00289027	0.814859	1	-0.000249859	-0.00247542	0.0019757	1	0	2	2	2	3	0	1	1	1	2	2	0	1	1	5	1	2	0	2	1
Bosea	0.000502379	0.0003869	0.82857	1	0.000115479	-0.000986547	0.00121751	0	0	0	2	0	0	1	0	0	0	0	0	0	0	0	0	0	0	0	2	0
Bifidobacterium	0.00281025	0.00246852	0.838713	1	0.000341728	-0.00313598	0.00381944	0	7	1	3	0	1	0	5	0	0	0	2	0	1	1	5	1	0	3	0	0
Peptococcus	0.119989	0.129798	0.84643	1	-0.00980944	-0.116001	0.0963819	25	53	32	291	39	9	32	130	16	75	16	128	43	24	58	41	42	102	148	99	24
Anaerovibrio	0.011838	0.0104892	0.859718	1	0.00134887	-0.0144287	0.0171264	36	2	6	5	5	0	0	4	0	7	4	13	4	0	0	3	0	2	2	25	8
Anaerofustis	0.00238433	0.00219239	0.866109	1	0.000191944	-0.00216019	0.00254408	1	3	0	1	2	2	0	0	0	4	0	1	1	0	2	0	2	3	0	2	0
Psychrobacter	0.0144206	0.0119838	0.869205	1	0.00243681	-0.0286094	0.033483	0	0	0	0	0	0	8	0	74	0	0	0	0	1	0	0	6	39	0	10	7
Saccharibacteria_genera_incertae_sedis	0.233805	0.217213	0.876305	1	0.0165923	-0.208238	0.241422	175	19	621	39	205	4	80	162	28	54	5	233	63	77	226	228	54	68	103	67	59
Trichococcus	0.000880578	0.000739574	0.890768	1	0.000141004	-0.00200493	0.00228694	0	0	0	0	0	0	0	0	5	0	0	0	0	0	0	0	0	2	0	0	2
Acidovorax	0.000164434	0.000195454	0.904678	1	-3.10195e-05	-0.000567448	0.000505409	0	0	0	1	0	0	0	0	0	0	0	0	0	0	0	1	0	0	0	0	0
Neorhizobium	0.00019799	0.000170762	0.91816	1	2.72279e-05	-0.000520338	0.000574794	0	0	0	0	1	0	0	0	0	0	0	0	0	0	0	0	0	1	0	0	0
Porphyrobacter	0.000173362	0.000199025	0.923598	1	-2.56632e-05	-0.000579453	0.000528127	0	1	0	0	0	0	0	0	0	0	0	0	0	0	0	0	0	0	0	0	1
Eisenbergiella	0.000159255	0.000182372	0.92497	1	-2.3117e-05	-0.000531088	0.000484854	0	0	1	0	0	0	0	0	0	0	0	0	0	1	0	0	0	0	0	0	0
Proteiniphilum	0.000347021	0.000390907	0.933993	1	-4.38865e-05	-0.00114012	0.00105235	0	0	0	0	0	0	2	0	0	0	0	0	0	0	0	2	0	0	0	0	0
Phreatobacter	0.000199248	0.000176969	0.934251	1	2.22792e-05	-0.000535657	0.000580216	0	0	0	0	0	1	0	0	0	0	0	0	0	0	1	0	0	0	0	0	0
Campylobacter	0.0147618	0.015503	0.93528	1	-0.000741209	-0.019631	0.0181486	31	24	7	11	1	0	4	5	2	1	1	40	10	2	2	22	4	2	2	1	1
Acinetobacter	0.00969126	0.0101205	0.937407	1	-0.000429246	-0.0117321	0.0108736	0	0	1	1	4	1	3	13	11	0	25	1	14	1	1	1	4	3	1	14	12
Allofustis	0.000528347	0.000479312	0.938354	1	4.90343e-05	-0.0012709	0.00136897	0	0	0	0	0	0	0	0	3	0	0	0	0	0	1	0	1	0	0	0	0
Ethanoligenens	0.0341325	0.0323754	0.941786	1	0.00175706	-0.0492248	0.0527389	5	13	4	60	29	1	14	18	0	16	41	136	6	0	1	4	0	15	5	4	21
Flaviflexus	0.00403121	0.00373516	0.946867	1	0.000296051	-0.00894375	0.00953585	0	0	0	0	0	0	1	0	21	0	1	0	1	0	0	0	0	14	0	4	2
Paraeggerthella	0.00353178	0.00341136	0.94761	1	0.000120425	-0.00367635	0.0039172	2	7	2	2	1	3	2	0	0	1	0	2	2	0	1	1	1	9	2	1	0
Helicobacter	0.00290689	0.00278617	0.953456	1	0.000120711	-0.00415298	0.00439441	4	5	0	7	0	1	0	0	0	0	0	1	0	1	1	2	0	9	2	0	0
Shuttleworthia	0.000183222	0.000195454	0.964065	1	-1.22321e-05	-0.000573484	0.00054902	0	0	0	0	0	0	0	0	0	1	0	0	0	0	0	1	0	0	0	0	0
Parasutterella	0.000172447	0.000161935	0.96502	1	1.05119e-05	-0.00048462	0.000505644	1	0	0	0	0	0	0	0	0	0	0	1	0	0	0	0	0	0	0	0	0
Elusimicrobium	0.000692551	0.000669151	0.968825	1	2.33997e-05	-0.00121595	0.00126275	2	0	0	1	0	0	0	0	0	1	0	2	2	0	0	0	0	0	0	0	0
Reyranella	0.000516533	0.000501368	0.975912	1	1.51654e-05	-0.00102233	0.00105266	0	0	0	0	1	0	0	0	0	0	2	0	0	0	0	0	1	0	0	0	1
Levilinea	0.000313417	0.000302343	0.976386	1	1.10735e-05	-0.000768511	0.000790658	0	0	0	1	0	0	0	1	0	0	0	0	0	0	0	0	1	0	0	0	0
Mycoplasma	0.000792756	0.000816308	0.976976	1	-2.35513e-05	-0.00172153	0.00167443	1	1	0	0	0	0	0	3	0	0	0	4	0	0	0	0	0	0	1	0	0
Jeotgalibaca	0.000863734	0.000842892	0.98036	1	2.08418e-05	-0.00174213	0.00178381	0	0	0	0	0	0	0	0	4	0	1	0	0	0	0	0	1	2	0	0	1
Rhodococcus	0.000176116	0.000170762	0.982817	1	5.35345e-06	-0.0005081	0.000518807	0	0	0	0	0	0	0	0	1	0	0	0	0	0	0	0	0	1	0	0	0
Jonesia	0.000176116	0.000170762	0.982817	1	5.35345e-06	-0.0005081	0.000518807	0	0	0	0	0	0	0	0	1	0	0	0	0	0	0	0	0	1	0	0	0
Treponema	1.74477	1.72368	0.984573	1	0.0210922	-2.24976	2.29194	911	440	101	2276	795	86	1243	4143	10	108	578	438	494	120	43	240	93	4676	136	2949	357
Erysipelothrix	0.107714	0.107264	0.989532	1	0.000449431	-0.0703297	0.0712286	149	97	20	39	56	28	70	97	14	20	39	129	26	19	137	41	27	61	109	26	21
Nitrolancea	0.00017351	0.000170762	0.99111	1	2.74839e-06	-0.000506835	0.000512332	0	0	0	0	0	0	1	0	0	0	0	0	0	0	0	0	0	1	0	0	0
Lactococcus	0	0	1	1	0	0	0	0	0	0	0	0	0	0	0	0	0	0	0	0	0	0	0	0	0	0	0	0
Thiobacillus	0	0	1	1	0	0	0	0	0	0	0	0	0	0	0	0	0	0	0	0	0	0	0	0	0	0	0	0
Anaeromyxobacter	0	0	1	1	0	0	0	0	0	0	0	0	0	0	0	0	0	0	0	0	0	0	0	0	0	0	0	0
Pelospora	0	0	1	1	0	0	0	0	0	0	0	0	0	0	0	0	0	0	0	0	0	0	0	0	0	0	0	0
Methylophaga	0	0	1	1	0	0	0	0	0	0	0	0	0	0	0	0	0	0	0	0	0	0	0	0	0	0	0	0
Paenibacillus	0	0	1	1	0	0	0	0	0	0	0	0	0	0	0	0	0	0	0	0	0	0	0	0	0	0	0	0
Providencia	0	0	1	1	0	0	0	0	0	0	0	0	0	0	0	0	0	0	0	0	0	0	0	0	0	0	0	0
Legionella	0	0	1	1	0	0	0	0	0	0	0	0	0	0	0	0	0	0	0	0	0	0	0	0	0	0	0	0
Desulfomonile	0	0	1	1	0	0	0	0	0	0	0	0	0	0	0	0	0	0	0	0	0	0	0	0	0	0	0	0
Ferruginibacter	0	0	1	1	0	0	0	0	0	0	0	0	0	0	0	0	0	0	0	0	0	0	0	0	0	0	0	0
Singulisphaera	0	0	1	1	0	0	0	0	0	0	0	0	0	0	0	0	0	0	0	0	0	0	0	0	0	0	0	0
Aquamicrobium	0	0	1	1	0	0	0	0	0	0	0	0	0	0	0	0	0	0	0	0	0	0	0	0	0	0	0	0
Thauera	0	0	1	1	0	0	0	0	0	0	0	0	0	0	0	0	0	0	0	0	0	0	0	0	0	0	0	0
Zavarzinella	0	0	1	1	0	0	0	0	0	0	0	0	0	0	0	0	0	0	0	0	0	0	0	0	0	0	0	0
Mobilitalea	0	0	1	1	0	0	0	0	0	0	0	0	0	0	0	0	0	0	0	0	0	0	0	0	0	0	0	0
Stomatobaculum	0	0	1	1	0	0	0	0	0	0	0	0	0	0	0	0	0	0	0	0	0	0	0	0	0	0	0	0
Pedomicrobium	0	0	1	1	0	0	0	0	0	0	0	0	0	0	0	0	0	0	0	0	0	0	0	0	0	0	0	0
Blastocatella	0	0	1	1	0	0	0	0	0	0	0	0	0	0	0	0	0	0	0	0	0	0	0	0	0	0	0	0
Methylobacterium	0	0	1	1	0	0	0	0	0	0	0	0	0	0	0	0	0	0	0	0	0	0	0	0	0	0	0	0
Hathewaya	0	0	1	1	0	0	0	0	0	0	0	0	0	0	0	0	0	0	0	0	0	0	0	0	0	0	0	0
Hespellia	0	0	1	1	0	0	0	0	0	0	0	0	0	0	0	0	0	0	0	0	0	0	0	0	0	0	0	0
Paenochrobactrum	0	0	1	1	0	0	0	0	0	0	0	0	0	0	0	0	0	0	0	0	0	0	0	0	0	0	0	0
Lachnobacterium	0	0	1	1	0	0	0	0	0	0	0	0	0	0	0	0	0	0	0	0	0	0	0	0	0	0	0	0
Longilinea	0	0	1	1	0	0	0	0	0	0	0	0	0	0	0	0	0	0	0	0	0	0	0	0	0	0	0	0
Streptomyces	0	0	1	1	0	0	0	0	0	0	0	0	0	0	0	0	0	0	0	0	0	0	0	0	0	0	0	0
Dechloromonas	0	0	1	1	0	0	0	0	0	0	0	0	0	0	0	0	0	0	0	0	0	0	0	0	0	0	0	0
Raoultella	0	0	1	1	0	0	0	0	0	0	0	0	0	0	0	0	0	0	0	0	0	0	0	0	0	0	0	0
Rhodovibrio	0	0	1	1	0	0	0	0	0	0	0	0	0	0	0	0	0	0	0	0	0	0	0	0	0	0	0	0
Altererythrobacter	0	0	1	1	0	0	0	0	0	0	0	0	0	0	0	0	0	0	0	0	0	0	0	0	0	0	0	0
Parvularcula	0	0	1	1	0	0	0	0	0	0	0	0	0	0	0	0	0	0	0	0	0	0	0	0	0	0	0	0
Yersinia	0	0	1	1	0	0	0	0	0	0	0	0	0	0	0	0	0	0	0	0	0	0	0	0	0	0	0	0
Gardnerella	0	0	1	1	0	0	0	0	0	0	0	0	0	0	0	0	0	0	0	0	0	0	0	0	0	0	0	0
Aminicenantes_genera_incertae_sedis	0	0	1	1	0	0	0	0	0	0	0	0	0	0	0	0	0	0	0	0	0	0	0	0	0	0	0	0
Mycobacterium	0	0	1	1	0	0	0	0	0	0	0	0	0	0	0	0	0	0	0	0	0	0	0	0	0	0	0	0
Opitutus	0	0	1	1	0	0	0	0	0	0	0	0	0	0	0	0	0	0	0	0	0	0	0	0	0	0	0	0
Photobacterium	0	0	1	1	0	0	0	0	0	0	0	0	0	0	0	0	0	0	0	0	0	0	0	0	0	0	0	0
Caldisericum	0	0	1	1	0	0	0	0	0	0	0	0	0	0	0	0	0	0	0	0	0	0	0	0	0	0	0	0
Enterobacter	0	0	1	1	0	0	0	0	0	0	0	0	0	0	0	0	0	0	0	0	0	0	0	0	0	0	0	0
Tepidiphilus	0	0	1	1	0	0	0	0	0	0	0	0	0	0	0	0	0	0	0	0	0	0	0	0	0	0	0	0
Geobacter	0	0	1	1	0	0	0	0	0	0	0	0	0	0	0	0	0	0	0	0	0	0	0	0	0	0	0	0
Desulfosalsimonas	0	0	1	1	0	0	0	0	0	0	0	0	0	0	0	0	0	0	0	0	0	0	0	0	0	0	0	0
Gemmobacter	0	0	1	1	0	0	0	0	0	0	0	0	0	0	0	0	0	0	0	0	0	0	0	0	0	0	0	0
Thermogutta	0	0	1	1	0	0	0	0	0	0	0	0	0	0	0	0	0	0	0	0	0	0	0	0	0	0	0	0
Shewanella	0	0	1	1	0	0	0	0	0	0	0	0	0	0	0	0	0	0	0	0	0	0	0	0	0	0	0	0
Lysinibacillus	0	0	1	1	0	0	0	0	0	0	0	0	0	0	0	0	0	0	0	0	0	0	0	0	0	0	0	0
Serratia	0	0	1	1	0	0	0	0	0	0	0	0	0	0	0	0	0	0	0	0	0	0	0	0	0	0	0	0
Ilumatobacter	0	0	1	1	0	0	0	0	0	0	0	0	0	0	0	0	0	0	0	0	0	0	0	0	0	0	0	0
Truepera	0	0	1	1	0	0	0	0	0	0	0	0	0	0	0	0	0	0	0	0	0	0	0	0	0	0	0	0
Phocoenobacter	0	0	1	1	0	0	0	0	0	0	0	0	0	0	0	0	0	0	0	0	0	0	0	0	0	0	0	0
Fictibacillus	0	0	1	1	0	0	0	0	0	0	0	0	0	0	0	0	0	0	0	0	0	0	0	0	0	0	0	0
Lactonifactor	0	0	1	1	0	0	0	0	0	0	0	0	0	0	0	0	0	0	0	0	0	0	0	0	0	0	0	0
Janthinobacterium	0	0	1	1	0	0	0	0	0	0	0	0	0	0	0	0	0	0	0	0	0	0	0	0	0	0	0	0
Methanosarcina	0	0	1	1	0	0	0	0	0	0	0	0	0	0	0	0	0	0	0	0	0	0	0	0	0	0	0	0

## Sheet: diff_genus_reads.D.vs.Y
diff_genus_reads.D.vs.Y
	Freq1	Freq2	pValue	qValue	Difference between means	95.0% lower CI	95.0% upper CI	MD1	MD2	MD3	MD4	MD5	MD6	MD7	MD8	MD9	MD10	MD11	MY1	MY2	MY3	MY4	MY5	MY6	MY7
Allisonella	0.000148982	0.00470551	0.00650489	1	-0.00455652	-0.00730967	-0.00180337	0	0	0	0	0	0	0	1	0	0	0	4	2	1	1	3	2	5
Acetanaerobacterium	0.221296	0.491438	0.00789594	1	-0.270142	-0.457854	-0.0824291	130	6	69	15	310	185	142	73	21	184	83	286	169	182	201	338	470	282
Cellulosibacter	0.00548336	0.0260725	0.0126671	1	-0.0205891	-0.035232	-0.00594622	0	1	0	4	8	0	6	2	1	5	4	27	9	17	6	23	5	13
Salinispira	0.00635088	0	0.0169928	1	0.00635088	0.00140096	0.0113008	2	0	2	9	0	6	6	12	0	1	0	0	0	0	0	0	0	0
Prevotella	0.295616	0.714461	0.0187375	1	-0.418846	-0.744096	-0.0935957	271	60	85	100	153	184	172	235	162	89	200	408	704	266	542	440	175	217
Hydrogenoanaerobacterium	0.00367079	0.00848772	0.0258927	1	-0.00481693	-0.00892479	-0.000709072	6	2	2	1	3	2	1	2	0	1	1	4	8	3	8	3	4	3
Dialister	0.000370437	0.0292998	0.0301224	1	-0.0289294	-0.053981	-0.00387768	1	0	0	0	1	0	0	0	0	0	0	9	5	28	19	40	0	9
Terrimonas	0.000692781	0	0.0391523	1	0.000692781	4.19804e-05	0.00134358	1	1	0	0	1	0	0	1	0	0	0	0	0	0	0	0	0	0
Catenisphaera	0.000875667	0	0.0523677	1	0.000875667	-1.08667e-05	0.0017622	2	0	0	0	1	0	1	0	0	0	1	0	0	0	0	0	0	0
Enterococcus	0.00918401	0.000539807	0.0525478	1	0.0086442	-0.000114542	0.0174029	0	0	2	0	0	0	1	18	14	15	5	0	0	0	2	0	0	0
Defluviitalea	0.00250303	0.000807346	0.0536955	1	0.00169569	-3.07558e-05	0.00342213	1	0	1	2	3	3	0	1	0	1	2	0	0	1	0	1	0	1
Pseudobutyrivibrio	0.10369	0.0247574	0.0573207	1	0.0789327	-0.00293286	0.160798	219	20	30	55	97	1	43	91	1	23	24	9	10	14	11	0	37	19
Murimonas	0.0012097	0	0.0609557	1	0.0012097	-6.7221e-05	0.00248662	2	0	0	3	1	0	1	0	0	0	0	0	0	0	0	0	0	0
Selenomonas	0.000159255	0.00368396	0.063735	1	-0.0035247	-0.0073236	0.000274195	0	0	1	0	0	0	0	0	0	0	0	1	3	0	6	3	1	0
Faecalibacterium	0.452831	0.241186	0.070649	1	0.211645	-0.0200547	0.443345	214	45	567	71	164	391	336	142	352	167	149	69	59	112	42	268	194	186
Mitsuokella	0.000525698	0.00362643	0.0727184	1	-0.00310073	-0.00657604	0.000374587	0	0	1	0	0	0	0	0	0	2	0	6	0	2	0	3	1	2
Dorea	0.908781	0.412959	0.0728661	1	0.495822	-0.0518237	1.04347	264	307	874	1004	134	454	241	140	1274	257	343	70	60	212	39	530	485	220
Shewanella	0	0.000752637	0.0798577	1	-0.000752637	-0.00162728	0.000122003	0	0	0	0	0	0	0	0	0	0	0	1	0	0	0	1	1	0
Faecalicoccus	0.0907407	0.181077	0.0828567	1	-0.0903367	-0.195177	0.0145037	32	104	45	82	43	3	12	106	3	63	47	106	14	102	64	195	153	71
Parabacteroides	0.00262066	0.00814703	0.0942888	1	-0.00552637	-0.0122263	0.00117351	7	1	0	1	3	0	1	1	0	0	1	4	9	3	6	9	0	0
Romboutsia	0.222001	0.547857	0.0948818	1	-0.325856	-0.724444	0.0727317	359	167	98	14	104	109	57	125	87	67	93	426	65	141	177	332	234	705
Megasphaera	0.0029016	0.0155526	0.100663	1	-0.012651	-0.0285425	0.0032405	0	0	4	0	0	5	0	0	2	5	0	24	10	1	19	1	1	4
Massilia	0.000878924	0	0.100883	1	0.000878924	-0.000204798	0.00196265	0	0	2	1	2	0	0	0	0	0	0	0	0	0	0	0	0	0
Brevundimonas	0.000682408	0	0.106405	1	0.000682408	-0.000174543	0.00153936	0	0	0	0	0	0	2	0	1	0	1	0	0	0	0	0	0	0
Mucispirillum	0.00211052	0.000279132	0.119666	1	0.00183139	-0.000554677	0.00421746	6	0	0	1	2	0	0	1	0	2	0	0	0	0	0	0	0	1
Mycoplasma	0.000792756	0	0.123874	1	0.000792756	-0.000258641	0.00184415	1	1	0	0	0	0	0	3	0	0	0	0	0	0	0	0	0	0
Cellulosilyticum	0.00352289	0.00146646	0.141568	1	0.00205643	-0.000789367	0.00490222	2	2	0	8	0	0	1	2	1	3	2	1	1	1	1	0	2	0
Anaerovorax	0.0782042	0.163103	0.1455	1	-0.0848984	-0.206178	0.0363809	10	10	9	31	88	36	101	52	4	65	36	31	26	74	189	135	165	18
Methanosphaera	0.0067318	0.0388019	0.158759	1	-0.0320701	-0.0807409	0.0166007	4	0	9	3	8	2	8	5	0	0	0	74	4	0	4	15	1	49
Sphingobacterium	0.000359337	0	0.166982	1	0.000359337	-0.000177886	0.00089656	0	0	0	0	0	0	0	0	1	1	0	0	0	0	0	0	0	0
Candidatus Solibacter	0.000337796	0	0.167054	1	0.000337796	-0.000167317	0.000842908	0	1	0	1	0	0	0	0	0	0	0	0	0	0	0	0	0	0
Phenylobacterium	0.00034055	0	0.167166	1	0.00034055	-0.000168829	0.000849929	0	0	0	1	0	0	0	0	1	0	0	0	0	0	0	0	0	0
Oligella	0.000335387	0	0.167482	1	0.000335387	-0.000166682	0.000837456	0	0	0	0	0	0	0	0	1	0	1	0	0	0	0	0	0	0
Acetivibrio	0.000370437	0	0.168006	1	0.000370437	-0.000184855	0.00092573	1	0	0	0	1	0	0	0	0	0	0	0	0	0	0	0	0	0
Tissierella	0.000745518	0	0.168009	1	0.000745518	-0.000372035	0.00186307	0	0	0	0	0	2	2	0	0	0	0	0	0	0	0	0	0	0
Pseudocitrobacter	0.000342477	0	0.168039	1	0.000342477	-0.000170946	0.0008559	0	0	1	0	0	0	0	0	0	1	0	0	0	0	0	0	0	0
Pseudoflavonifractor	0.00620848	0.013862	0.168738	1	-0.00765353	-0.0193649	0.00405779	7	0	0	0	7	5	5	4	1	1	5	7	2	11	1	20	6	6
Rhodoplanes	0.000357245	0	0.169644	1	0.000357245	-0.000180545	0.000895035	0	0	1	0	1	0	0	0	0	0	0	0	0	0	0	0	0	0
Helicobacter	0.00290689	0.00693595	0.17017	1	-0.00402906	-0.0100899	0.00203178	4	5	0	7	0	1	0	0	0	0	0	6	2	2	10	3	4	0
Mycobacterium	0	0.000501195	0.172314	1	-0.000501195	-0.00129283	0.000290443	0	0	0	0	0	0	0	0	0	0	0	1	0	1	0	0	0	0
Parvularcula	0	0.000519279	0.172708	1	-0.000519279	-0.00134036	0.000301806	0	0	0	0	0	0	0	0	0	0	0	0	0	1	1	0	0	0
Gardnerella	0	0.000530952	0.172984	1	-0.000530952	-0.00137113	0.000309225	0	0	0	0	0	0	0	0	0	0	0	1	0	0	0	0	0	1
Sharpea	0.00202615	0.0077774	0.175765	1	-0.00575124	-0.0147533	0.00325084	0	1	0	0	0	6	0	2	1	1	0	2	1	2	0	14	3	7
Barnesiella	1.32447	3.26841	0.178508	1	-1.94394	-5.01946	1.13158	647	2025	113	311	1041	435	1320	1104	83	315	214	2965	4992	755	3046	269	334	384
Clostridium IV	1.18779	1.70973	0.178851	1	-0.521937	-1.32658	0.282708	679	436	577	595	969	712	420	1411	178	500	412	1099	939	489	1600	1271	731	453
Reyranella	0.000516533	0	0.179483	1	0.000516533	-0.000280805	0.00131387	0	0	0	0	1	0	0	0	0	0	2	0	0	0	0	0	0	0
Alcanivorax	0.000546269	0	0.18371	1	0.000546269	-0.00030596	0.0013985	0	0	0	0	0	1	2	0	0	0	0	0	0	0	0	0	0	0
Cetobacterium	0	0.00991229	0.184267	1	-0.00991229	-0.0260814	0.00625678	0	0	0	0	0	0	0	0	0	0	0	27	0	0	0	4	9	0
Ignavibacterium	0.000826312	0	0.184732	1	0.000826312	-0.0004661	0.00211872	0	0	0	0	0	0	0	2	3	0	0	0	0	0	0	0	0	0
Bifidobacterium	0.00281025	0.0066986	0.187613	1	-0.00388835	-0.0100243	0.00224756	0	7	1	3	0	1	0	5	0	0	0	5	0	11	4	3	1	2
Pseudoxanthomonas	0.000523137	0	0.191165	1	0.000523137	-0.000308222	0.0013545	0	0	0	0	0	0	2	0	1	0	0	0	0	0	0	0	0	0
Lysinibacillus	0	0.000777589	0.192189	1	-0.000777589	-0.00207271	0.000517533	0	0	0	0	0	0	0	0	0	0	0	0	0	2	0	1	0	0
Kurthia	0.000525742	0	0.193101	1	0.000525742	-0.000313736	0.00136522	0	0	0	0	0	0	1	0	2	0	0	0	0	0	0	0	0	0
Flavonifractor	0.135384	0.184518	0.194647	1	-0.0491339	-0.126793	0.0285252	140	87	28	50	89	69	98	114	18	59	26	109	108	90	140	50	187	51
Slackia	0.0688652	0.139977	0.195899	1	-0.071112	-0.188039	0.0458154	17	16	47	65	13	86	4	15	34	58	36	15	7	144	24	155	54	132
Lactobacillus	37.2513	24.4797	0.197746	1	12.7715	-7.65884	33.2019	13280	9958	28330	23495	8618	4030	27631	16172	31514	25785	30592	4861	11636	34685	4312	2889	25831	14249
Lutispora	0	0.00150927	0.199507	1	-0.00150927	-0.00407108	0.00105254	0	0	0	0	0	0	0	0	0	0	0	2	4	0	0	0	0	0
Phascolarctobacterium	0.0243788	0.0651385	0.199526	1	-0.0407597	-0.109532	0.0280125	32	9	3	9	14	10	13	23	6	14	8	16	110	9	16	3	96	17
Aeromonas	0.0014829	0.0081058	0.200824	1	-0.0066229	-0.0178426	0.00459685	1	0	0	0	2	0	0	4	0	0	2	13	0	0	0	3	18	0
Gp6	0.000569342	0	0.201162	1	0.000569342	-0.000357749	0.00149643	0	1	0	0	2	0	0	0	0	0	0	0	0	0	0	0	0	0
Thermogutta	0	0.00082758	0.201928	1	-0.00082758	-0.00224103	0.000585875	0	0	0	0	0	0	0	0	0	0	0	0	0	0	1	2	0	0
Vampirovibrio	0.318626	0.978848	0.20205	1	-0.660222	-1.78385	0.463407	167	141	353	54	218	99	266	232	7	247	64	444	554	275	174	1877	111	230
Terrisporobacter	2.74173	3.91401	0.209713	1	-1.17228	-3.09581	0.751261	1935	1140	409	670	1860	1543	316	2368	937	1036	3748	2424	486	1787	1527	2733	2738	3417
Peptoniphilus	0.00463346	0.000251819	0.217013	1	0.00438164	-0.00302201	0.0117853	1	0	5	0	0	0	0	0	19	0	2	1	0	0	0	0	0	0
Anaerobacter	2.33419	4.03854	0.221043	1	-1.70435	-4.65383	1.24512	2399	1298	636	385	1229	2850	192	1351	984	636	1226	4153	497	844	1182	2083	1982	4720
Truepera	0	0.00102536	0.225262	1	-0.00102536	-0.00288179	0.000831066	0	0	0	0	0	0	0	0	0	0	0	3	0	0	1	0	0	0
Ethanoligenens	0.0341325	0.0184873	0.2282	1	0.0156451	-0.0108336	0.0421238	5	13	4	60	29	1	14	18	0	16	41	33	11	14	4	3	4	4
Escherichia/Shigella	0.220997	0.561561	0.228747	1	-0.340563	-0.954033	0.272906	271	146	103	21	14	302	62	49	95	46	144	134	50	20	129	794	185	763
Alloprevotella	0.0313015	0.0632465	0.230719	1	-0.0319451	-0.0895876	0.0256975	43	11	9	9	14	11	28	27	5	15	10	56	95	9	58	10	3	14
Acholeplasma	0.000771256	0	0.231579	1	0.000771256	-0.000577941	0.00212045	0	0	0	0	0	3	1	0	0	0	0	0	0	0	0	0	0	0
Butyrivibrio	0.00467536	0.0112642	0.237544	1	-0.00658884	-0.0185663	0.00538862	1	1	7	0	1	8	0	5	1	1	2	7	1	22	3	7	2	2
Sphingosinicella	0.000831098	0	0.238671	1	0.000831098	-0.000646658	0.00230885	0	1	0	4	0	0	0	0	0	0	0	0	0	0	0	0	0	0
Salinicoccus	0.0070306	0.00075057	0.23921	1	0.00628003	-0.0048831	0.0174432	5	0	0	0	1	0	3	0	29	1	1	1	0	2	0	0	0	0
Subdivision5_genera_incertae_sedis	0.116566	0.564587	0.242173	1	-0.448022	-1.28744	0.391397	54	277	1	8	12	38	10	265	0	16	23	280	541	0	1298	0	21	11
Plesiomonas	0	0.00391721	0.242849	1	-0.00391721	-0.0113176	0.0034832	0	0	0	0	0	0	0	0	0	0	0	1	0	0	0	2	14	0
Actinobacillus	0.00155903	0.000279132	0.249828	1	0.0012799	-0.00103274	0.00359254	6	0	0	0	0	1	0	1	1	0	0	0	0	0	0	0	0	1
Turicibacter	0.257749	0.391376	0.251695	1	-0.133627	-0.374901	0.107648	437	193	86	19	135	121	22	235	72	79	96	247	59	61	223	196	331	397
Tistrella	0.000970504	0	0.252141	1	0.000970504	-0.000808728	0.00274974	0	0	0	0	0	4	1	0	0	0	0	0	0	0	0	0	0	0
Eubacterium	0.802036	0.576056	0.256123	1	0.22598	-0.180919	0.632879	691	98	266	139	278	623	269	546	924	518	225	437	157	148	193	318	676	354
Serratia	0	0.00153823	0.26227	1	-0.00153823	-0.00458076	0.00150431	0	0	0	0	0	0	0	0	0	0	0	5	0	0	0	0	0	1
Ornithinimicrobium	0.00228429	0	0.2648	1	0.00228429	-0.00202414	0.00659272	0	0	0	0	0	0	2	0	11	0	0	0	0	0	0	0	0	0
Klebsiella	0.00382965	0.00150245	0.268	1	0.00232719	-0.00198821	0.0066426	0	0	0	0	0	0	1	9	6	6	1	0	0	0	0	3	3	0
Rummeliibacillus	0.000346723	0.00328573	0.276071	1	-0.00293901	-0.00890841	0.00303039	0	2	0	0	0	0	0	0	0	0	0	2	0	0	1	0	0	9
Parvibacter	0.0864512	0.144898	0.27623	1	-0.0584471	-0.173166	0.0562715	47	106	52	106	72	14	18	42	4	25	16	203	64	11	92	2	139	67
Butyricicoccus	0.543534	1.2197	0.277036	1	-0.676164	-2.04474	0.692409	291	4	317	30	310	581	279	217	576	201	258	43	62	952	19	2109	1156	380
Oxalobacter	0.0011448	0.00387294	0.278012	1	-0.00272813	-0.00822288	0.00276661	0	0	0	0	0	1	1	4	1	0	0	1	9	0	4	1	0	0
Ezakiella	0.0137041	0.000558265	0.280033	1	0.0131459	-0.0124918	0.0387836	8	2	73	0	0	0	0	0	2	0	0	0	0	0	0	0	0	2
Anaerovibrio	0.011838	0.00509875	0.286521	1	0.0067393	-0.00647624	0.0199548	36	2	6	5	5	0	0	4	0	7	4	5	6	0	1	1	3	4
Hungatella	0.00182579	0.00333638	0.287015	1	-0.00151059	-0.00451396	0.00149277	0	1	1	0	1	2	2	0	0	3	0	2	5	3	1	2	0	0
Nosocomiicoccus	0.00868855	0.00228552	0.291115	1	0.00640303	-0.00635758	0.0191636	7	1	0	0	5	0	2	0	33	0	1	2	0	0	0	2	3	2
Fastidiosipila	0.00816425	0.000249375	0.29406	1	0.00791487	-0.00800756	0.0238373	0	0	0	0	1	2	2	0	41	0	0	0	0	1	0	0	0	0
Rhodobacter	0.000148982	0.000768654	0.294502	1	-0.000619672	-0.00191348	0.000674134	0	0	0	0	0	0	0	1	0	0	0	0	0	2	1	0	0	0
Paraeggerthella	0.00353178	0.00570436	0.300248	1	-0.00217258	-0.00655137	0.00220621	2	7	2	2	1	3	2	0	0	1	0	2	1	2	7	5	4	1
Sphaerochaeta	0.0568492	0.0274147	0.305403	1	0.0294345	-0.0305217	0.0893907	165	29	14	13	27	9	9	37	1	13	14	23	23	3	28	5	0	22
Mogibacterium	0.0154053	0.0290421	0.309215	1	-0.0136368	-0.0421973	0.0149236	12	36	11	4	5	3	3	5	0	10	0	50	6	1	16	12	4	22
Yaniella	0.0015777	0.000249375	0.318896	1	0.00132833	-0.00147627	0.00413293	2	0	0	0	0	0	0	0	7	0	0	0	0	1	0	0	0	0
Succinivibrio	0.00766778	0.0151363	0.319272	1	-0.00746851	-0.0237149	0.00877788	5	0	7	1	5	6	0	2	0	14	3	8	4	7	0	27	4	7
Guggenheimella	0.0278158	0	0.328224	1	0.0278158	-0.0324803	0.088112	0	0	0	0	0	0	4	0	154	0	0	0	0	0	0	0	0	0
Helcococcus	0.0227391	0.0017501	0.329887	1	0.020989	-0.0246468	0.0666248	0	0	0	0	0	2	10	0	117	0	0	1	1	5	0	0	0	0
Fibrobacter	0.00520415	0.0221212	0.330982	1	-0.016917	-0.0556993	0.0218653	14	11	0	1	2	0	1	1	0	0	0	65	10	0	12	0	0	0
Catabacter	0.00307415	0.0015345	0.334307	1	0.00153965	-0.00174258	0.00482187	0	2	0	0	6	2	4	3	0	0	0	0	2	0	3	0	1	0
Novosphingobium	0.00151237	0.000800149	0.334866	1	0.000712224	-0.000809258	0.00223371	0	0	2	0	1	0	0	1	3	0	2	0	1	0	1	1	0	0
Trueperella	0.0222993	0.0023289	0.335216	1	0.0199704	-0.0239651	0.0639059	2	2	2	0	0	0	8	0	113	0	0	1	1	4	1	0	0	2
Howardella	0.000901388	0.00322182	0.338499	1	-0.00232043	-0.00772717	0.00308631	2	0	1	0	1	1	0	0	0	0	0	3	0	9	0	0	1	0
Ruminococcus	0.703777	1.2238	0.340345	1	-0.520024	-1.69957	0.659521	360	38	157	360	1064	168	155	858	47	284	576	136	2118	361	327	333	1340	317
Catellicoccus	0.00017351	0	0.340893	1	0.00017351	-0.000213095	0.000560116	0	0	0	0	0	0	1	0	0	0	0	0	0	0	0	0	0	0
Thermomarinilinea	0.000344895	0	0.340893	1	0.000344895	-0.000423579	0.00111337	2	0	0	0	0	0	0	0	0	0	0	0	0	0	0	0	0	0
Proteiniphilum	0.000347021	0	0.340893	1	0.000347021	-0.00042619	0.00112023	0	0	0	0	0	0	2	0	0	0	0	0	0	0	0	0	0	0
Nitrolancea	0.00017351	0	0.340893	1	0.00017351	-0.000213095	0.000560116	0	0	0	0	0	0	1	0	0	0	0	0	0	0	0	0	0	0
Actinotalea	0.000172447	0	0.340893	1	0.000172447	-0.000211789	0.000556684	1	0	0	0	0	0	0	0	0	0	0	0	0	0	0	0	0	0
Povalibacter	0.000172447	0	0.340893	1	0.000172447	-0.000211789	0.000556684	1	0	0	0	0	0	0	0	0	0	0	0	0	0	0	0	0	0
Cloacibacillus	0.000344895	0	0.340893	1	0.000344895	-0.000423579	0.00111337	2	0	0	0	0	0	0	0	0	0	0	0	0	0	0	0	0	0
Comamonas	0.00059397	0	0.340893	1	0.00059397	-0.000729478	0.00191742	0	0	0	0	3	0	0	0	0	0	0	0	0	0	0	0	0	0
Delftia	0.000172447	0	0.340893	1	0.000172447	-0.000211789	0.000556684	1	0	0	0	0	0	0	0	0	0	0	0	0	0	0	0	0	0
Murdochiella	0.000159255	0	0.340893	0.849929	0.000159255	-0.000195587	0.000514097	0	0	1	0	0	0	0	0	0	0	0	0	0	0	0	0	0	0
Porphyrobacter	0.000173362	0	0.340893	0.898497	0.000173362	-0.000212912	0.000559635	0	1	0	0	0	0	0	0	0	0	0	0	0	0	0	0	0	0
Neorhizobium	0.00019799	0	0.340893	0.892125	0.00019799	-0.000243159	0.000639139	0	0	0	0	1	0	0	0	0	0	0	0	0	0	0	0	0	0
Tessaracoccus	0.00264173	0	0.340893	1	0.00264173	-0.00324442	0.00852788	0	0	0	0	0	0	0	0	15	0	0	0	0	0	0	0	0	0
Hyphomicrobium	0.00019799	0	0.340893	0.844225	0.00019799	-0.000243159	0.000639139	0	0	0	0	1	0	0	0	0	0	0	0	0	0	0	0	0	0
Acetoanaerobium	0.000297965	0	0.340893	0.904961	0.000297965	-0.000365942	0.000961872	0	0	0	0	0	0	0	2	0	0	0	0	0	0	0	0	0	0
Phreatobacter	0.000199248	0	0.340893	0.911519	0.000199248	-0.000244705	0.000643202	0	0	0	0	0	1	0	0	0	0	0	0	0	0	0	0	0	0
Flavobacterium	0.000176116	0	0.340893	1	0.000176116	-0.000216294	0.000568525	0	0	0	0	0	0	0	0	1	0	0	0	0	0	0	0	0	0
Rhodococcus	0.000176116	0	0.340893	0.918172	0.000176116	-0.000216294	0.000568525	0	0	0	0	0	0	0	0	1	0	0	0	0	0	0	0	0	0
Youngiibacter	0.00158504	0	0.340893	1	0.00158504	-0.00194665	0.00511673	0	0	0	0	0	0	0	0	9	0	0	0	0	0	0	0	0	0
Denitratisoma	0.00019799	0	0.340893	0.885842	0.00019799	-0.000243159	0.000639139	0	0	0	0	1	0	0	0	0	0	0	0	0	0	0	0	0	0
Nitrincola	0.000796994	0	0.340893	0.99833	0.000796994	-0.000978819	0.00257281	0	0	0	0	0	4	0	0	0	0	0	0	0	0	0	0	0	0
Trichococcus	0.000880578	0	0.340893	1	0.000880578	-0.00108147	0.00284263	0	0	0	0	0	0	0	0	5	0	0	0	0	0	0	0	0	0
Sanguibacter	0.000176116	0	0.340893	0.990469	0.000176116	-0.000216294	0.000568525	0	0	0	0	0	0	0	0	1	0	0	0	0	0	0	0	0	0
Anaerorhabdus	0.000346723	0	0.340893	1	0.000346723	-0.000425824	0.00111927	0	2	0	0	0	0	0	0	0	0	0	0	0	0	0	0	0	0
Allofustis	0.000528347	0	0.340893	1	0.000528347	-0.000648883	0.00170558	0	0	0	0	0	0	0	0	3	0	0	0	0	0	0	0	0	0
Roseibacillus	0.000159272	0	0.340893	0.982731	0.000159272	-0.000195608	0.000514151	0	0	0	0	0	0	0	0	0	0	1	0	0	0	0	0	0	0
Subdivision3_genera_incertae_sedis	0.000164434	0	0.340893	0.873539	0.000164434	-0.000201948	0.000530816	0	0	0	1	0	0	0	0	0	0	0	0	0	0	0	0	0	0
Stappia	0.00104106	0	0.340893	1	0.00104106	-0.00127857	0.0033607	0	0	0	0	0	0	6	0	0	0	0	0	0	0	0	0	0	0
Fontibacter	0.000520531	0	0.340893	0.975113	0.000520531	-0.000639285	0.00168035	0	0	0	0	0	0	3	0	0	0	0	0	0	0	0	0	0	0
Anaerobiospirillum	0.000159255	0	0.340893	0.867514	0.000159255	-0.000195587	0.000514097	0	0	1	0	0	0	0	0	0	0	0	0	0	0	0	0	0	0
Gp1	0.000159255	0	0.340893	0.861572	0.000159255	-0.000195587	0.000514097	0	0	1	0	0	0	0	0	0	0	0	0	0	0	0	0	0	0
Janibacter	0.000176116	0	0.340893	1	0.000176116	-0.000216294	0.000568525	0	0	0	0	0	0	0	0	1	0	0	0	0	0	0	0	0	0
Arcanobacterium	0.000880578	0	0.340893	1	0.000880578	-0.00108147	0.00284263	0	0	0	0	0	0	0	0	5	0	0	0	0	0	0	0	0	0
Gordonia	0.000318543	0	0.340893	0.967612	0.000318543	-0.000391215	0.0010283	0	0	0	0	0	0	0	0	0	0	2	0	0	0	0	0	0	0
Petrimonas	0.000880578	0	0.340893	1	0.000880578	-0.00108147	0.00284263	0	0	0	0	0	0	0	0	5	0	0	0	0	0	0	0	0	0
Steroidobacter	0.000173362	0	0.340893	0.879647	0.000173362	-0.000212912	0.000559635	0	1	0	0	0	0	0	0	0	0	0	0	0	0	0	0	0	0
Ornithinicoccus	0.000176116	0	0.340893	0.960226	0.000176116	-0.000216294	0.000568525	0	0	0	0	0	0	0	0	1	0	0	0	0	0	0	0	0	0
Fusobacterium	0.000148982	0	0.340893	0.952951	0.000148982	-0.000182971	0.000480936	0	0	0	0	0	0	0	1	0	0	0	0	0	0	0	0	0	0
Phaeodactylibacter	0.00039598	0	0.340893	0.938728	0.00039598	-0.000486318	0.00127828	0	0	0	0	2	0	0	0	0	0	0	0	0	0	0	0	0	0
Jonesia	0.000176116	0	0.340893	0.931775	0.000176116	-0.000216294	0.000568525	0	0	0	0	0	0	0	0	1	0	0	0	0	0	0	0	0	0
Hyphomonas	0.000176116	0	0.340893	0.855711	0.000176116	-0.000216294	0.000568525	0	0	0	0	0	0	0	0	1	0	0	0	0	0	0	0	0	0
Stackebrandtia	0.000346723	0	0.340893	0.924923	0.000346723	-0.000425824	0.00111927	0	2	0	0	0	0	0	0	0	0	0	0	0	0	0	0	0	0
Acidovorax	0.000164434	0	0.340893	0.945786	0.000164434	-0.000201948	0.000530816	0	0	0	1	0	0	0	0	0	0	0	0	0	0	0	0	0	0
Lysobacter	0.00123281	0	0.340893	1	0.00123281	-0.00151406	0.00397968	0	0	0	0	0	0	0	0	7	0	0	0	0	0	0	0	0	0
Globicatella	0.0131739	0.00128793	0.341213	0.839385	0.011886	-0.0145932	0.0383652	2	1	1	0	0	0	3	0	68	0	0	0	0	3	2	0	0	0
Acetatifactor	0.0155801	0.0101485	0.346852	0.847605	0.0054316	-0.0065601	0.0174233	17	13	8	21	8	2	3	9	0	3	8	1	11	4	0	2	5	16
Nitrosomonas	0.00264041	0.00177788	0.347008	0.842408	0.000862533	-0.00104017	0.00276524	1	0	2	2	2	3	0	1	1	1	2	3	1	0	1	0	1	1
Yersinia	0	0.0152951	0.348344	0.840125	-0.0152951	-0.0520912	0.0215009	0	0	0	0	0	0	0	0	0	0	0	0	0	0	0	0	1	54
Clostridium sensu stricto	0.498553	0.695301	0.353277	0.846489	-0.196748	-0.648524	0.255029	652	342	81	157	96	164	394	443	161	145	296	314	206	115	413	201	663	792
Anaerobacterium	0.00284593	0.0889143	0.355804	0.847043	-0.0860684	-0.296597	0.12446	3	2	0	0	7	0	0	4	0	0	0	0	4	5	0	310	1	0
Altererythrobacter	0	0.000557676	0.355918	0.786429	-0.000557676	-0.00192226	0.000806908	0	0	0	0	0	0	0	0	0	0	0	0	0	0	0	2	0	0
Aminicenantes_genera_incertae_sedis	0	0.000557676	0.355918	0.791166	-0.000557676	-0.00192226	0.000806908	0	0	0	0	0	0	0	0	0	0	0	0	0	0	0	2	0	0
Opitutus	0	0.000539807	0.355918	0.795961	-0.000539807	-0.00186067	0.000781053	0	0	0	0	0	0	0	0	0	0	0	0	0	0	2	0	0	0
Photobacterium	0	0.000557676	0.355918	0.800815	-0.000557676	-0.00192226	0.000806908	0	0	0	0	0	0	0	0	0	0	0	0	0	0	0	2	0	0
Erythrobacter	0	0.00175985	0.355918	0.841882	-0.00175985	-0.00606605	0.00254635	0	0	0	0	0	0	0	0	0	0	0	0	7	0	0	0	0	0
Enterobacter	0	0.000557676	0.355918	0.810701	-0.000557676	-0.00192226	0.000806908	0	0	0	0	0	0	0	0	0	0	0	0	0	0	0	2	0	0
Geobacter	0	0.000557676	0.355918	0.815737	-0.000557676	-0.00192226	0.000806908	0	0	0	0	0	0	0	0	0	0	0	0	0	0	0	2	0	0
Parcubacteria_genera_incertae_sedis	0	0.000539807	0.355918	0.820835	-0.000539807	-0.00186067	0.000781053	0	0	0	0	0	0	0	0	0	0	0	0	0	0	2	0	0	0
Simplicispira	0	0.000539807	0.355918	0.825998	-0.000539807	-0.00186067	0.000781053	0	0	0	0	0	0	0	0	0	0	0	0	0	0	2	0	0	0
Fictibacillus	0	0.00111535	0.355918	0.83652	-0.00111535	-0.00384452	0.00161382	0	0	0	0	0	0	0	0	0	0	0	0	0	0	0	4	0	0
Gp3	0	0.000269903	0.355918	0.781748	-0.000269903	-0.000930333	0.000390526	0	0	0	0	0	0	0	0	0	0	0	0	0	0	1	0	0	0
Caldisericum	0	0.000557676	0.355918	0.805728	-0.000557676	-0.00192226	0.000806908	0	0	0	0	0	0	0	0	0	0	0	0	0	0	0	2	0	0
Aestuariispira	0	0.000754222	0.355918	0.831225	-0.000754222	-0.00259974	0.00109129	0	0	0	0	0	0	0	0	0	0	0	0	3	0	0	0	0	0
Ilumatobacter	0	0.000269903	0.355918	0.777122	-0.000269903	-0.000930333	0.000390526	0	0	0	0	0	0	0	0	0	0	0	0	0	0	1	0	0	0
Lachnospira	0	0.000279132	0.355918	0.733707	-0.000279132	-0.000962145	0.00040388	0	0	0	0	0	0	0	0	0	0	0	0	0	0	0	0	0	1
Bradyrhizobium	0	0.000251819	0.355918	0.737829	-0.000251819	-0.000867999	0.00036436	0	0	0	0	0	0	0	0	0	0	0	1	0	0	0	0	0	0
Pusillimonas	0	0.000279132	0.355918	0.746214	-0.000279132	-0.000962145	0.00040388	0	0	0	0	0	0	0	0	0	0	0	0	0	0	0	0	0	1
Tepidiphilus	0	0.000443959	0.355918	0.750478	-0.000443959	-0.00153029	0.00064237	0	0	0	0	0	0	0	0	0	0	0	0	0	0	0	0	2	0
Desulfosalsimonas	0	0.000503639	0.355918	0.754791	-0.000503639	-0.001736	0.000728721	0	0	0	0	0	0	0	0	0	0	0	2	0	0	0	0	0	0
Armatimonadetes_gp5	0	0.000498751	0.355918	0.759154	-0.000498751	-0.00171915	0.000721648	0	0	0	0	0	0	0	0	0	0	0	0	0	2	0	0	0	0
Pseudaminobacter	0	0.000279132	0.355918	0.763568	-0.000279132	-0.000962145	0.00040388	0	0	0	0	0	0	0	0	0	0	0	0	0	0	0	0	0	1
Kitasatospora	0	0.000279132	0.355918	0.741998	-0.000279132	-0.000962145	0.00040388	0	0	0	0	0	0	0	0	0	0	0	0	0	0	0	0	0	1
Rhodovibrio	0	0.000503639	0.355918	0.7256	-0.000503639	-0.001736	0.000728721	0	0	0	0	0	0	0	0	0	0	0	2	0	0	0	0	0	0
Rhodopirellula	0	0.000249375	0.355918	0.772551	-0.000249375	-0.000859575	0.000360824	0	0	0	0	0	0	0	0	0	0	0	0	0	1	0	0	0	0
Xanthobacter	0	0.000251819	0.355918	0.71767	-0.000251819	-0.000867999	0.00036436	0	0	0	0	0	0	0	0	0	0	0	1	0	0	0	0	0	0
Rhizobium	0	0.000249375	0.355918	0.721613	-0.000249375	-0.000859575	0.000360824	0	0	0	0	0	0	0	0	0	0	0	0	0	1	0	0	0	0
Phocoenobacter	0	0.00100563	0.355918	0.768033	-0.00100563	-0.00346631	0.00145506	0	0	0	0	0	0	0	0	0	0	0	0	4	0	0	0	0	0
Aquamicrobium	0	0.000558265	0.355918	0.729631	-0.000558265	-0.00192429	0.00080776	0	0	0	0	0	0	0	0	0	0	0	0	0	0	0	0	0	2
Gemmiger	1.37425	1.82068	0.35828	0.718507	-0.446432	-1.50413	0.611265	991	185	1204	726	863	918	506	938	615	470	530	540	238	1340	431	1837	1484	1192
Alloiococcus	0.00228583	0.000249375	0.358346	0.714756	0.00203646	-0.00266513	0.00673805	1	0	0	0	0	0	0	0	12	0	0	0	0	1	0	0	0	0
Falsiporphyromonas	0.0247832	0.0409735	0.358762	0.711738	-0.0161902	-0.0547874	0.022407	26	12	1	3	23	7	25	18	3	17	6	54	25	1	52	4	3	18
Flaviflexus	0.00403121	0.000498751	0.36214	0.714597	0.00353246	-0.00468456	0.0117495	0	0	0	0	0	0	1	0	21	0	1	0	0	2	0	0	0	0
Staphylococcus	0.00566385	0.0133451	0.364286	0.715008	-0.00768122	-0.0262718	0.0109093	2	9	0	1	12	1	4	1	1	0	0	5	0	0	1	29	8	7
Brevibacterium	0.01279	0.00326521	0.367042	0.716606	0.00952477	-0.0127286	0.0317782	6	1	1	0	1	0	5	0	57	0	2	2	0	1	0	0	0	9
Blautia	0.736638	1.05629	0.368076	0.714842	-0.319655	-1.09104	0.45173	236	161	420	628	244	802	179	334	537	360	304	233	69	1022	120	1142	889	635
Oribacterium	0.195144	0.383121	0.370558	0.715894	-0.187977	-0.638486	0.262532	14	7	235	17	74	463	95	146	1	17	18	60	81	67	180	733	184	133
Dietzia	0.0310889	0.0500381	0.371959	0.714858	-0.0189492	-0.064338	0.0264396	13	24	22	1	2	27	0	0	52	8	29	36	16	5	38	16	4	72
Pilibacter	0.000729193	0.0013496	0.373862	0.714793	-0.000620403	-0.00208237	0.00084156	0	2	0	0	0	1	0	0	0	1	0	1	0	0	2	1	0	1
Luteimonas	0.0058066	0.00075057	0.375921	0.715025	0.00505603	-0.00708161	0.0171937	0	0	0	0	0	0	2	0	31	0	0	1	0	2	0	0	0	0
Shuttleworthia	0.000183222	0.0036249	0.379438	0.718013	-0.00344167	-0.0123119	0.00542851	0	0	0	0	0	0	0	0	0	1	0	0	0	0	0	13	0	0
Anaerococcus	0.0276516	0.00522219	0.380634	0.716601	0.0224294	-0.0319829	0.0768417	1	2	7	1	0	1	2	1	140	1	2	3	0	9	1	5	0	2
Elusimicrobium	0.000692551	0.000269903	0.383554	0.718434	0.000422647	-0.000577872	0.00142317	2	0	0	1	0	0	0	0	0	1	0	0	0	0	1	0	0	0
Gallicola	0.00140526	0.000279132	0.390189	0.727171	0.00112612	-0.00164444	0.00389669	1	0	0	0	0	0	0	0	7	0	0	0	0	0	0	0	0	1
Anaerotruncus	0.00133965	0.00684327	0.390604	0.724285	-0.00550362	-0.0200056	0.00899837	3	0	0	0	0	1	0	3	1	0	0	1	24	0	0	2	0	0
Ercella	0.00264173	0.000269903	0.39233	0.723849	0.00237183	-0.00352866	0.00827232	0	0	0	0	0	0	0	0	15	0	0	0	0	0	1	0	0	0
Saccharofermentans	0.005395	0.0021219	0.392595	0.720734	0.0032731	-0.00480457	0.0113508	2	0	1	2	1	0	2	0	21	0	2	0	3	0	3	1	0	1
Faecalitalea	0.00372332	0.0387588	0.397486	0.726101	-0.0350355	-0.129084	0.059013	0	1	4	1	0	3	0	0	0	10	2	0	0	0	0	138	0	1
Campylobacter	0.0147618	0.0485398	0.400228	0.727508	-0.033778	-0.124343	0.0567867	31	24	7	11	1	0	4	5	2	1	1	152	11	0	22	2	2	2
Psychrobacter	0.0144206	0.00303051	0.403527	0.72991	0.0113901	-0.017619	0.0403993	0	0	0	0	0	0	8	0	74	0	0	1	3	7	0	1	0	0
Labrenzia	0.000521741	0.00022198	0.405832	0.730497	0.000299762	-0.000444647	0.00104417	0	0	0	0	0	1	1	1	0	0	0	0	0	0	0	0	1	0
Nocardiopsis	0.000349477	0.0011073	0.411835	0.737705	-0.000757823	-0.00281338	0.00129774	0	1	0	0	0	0	0	0	1	0	0	0	0	0	1	0	0	3
Facklamia	0.00539479	0.00178723	0.41415	0.738268	0.00360757	-0.00574745	0.0129626	1	0	2	0	0	1	0	0	24	0	3	4	0	0	0	1	1	1
Jeotgalicoccus	0.010552	0.0043242	0.427987	0.759265	0.0062278	-0.0104468	0.0229024	5	0	0	0	3	0	7	1	43	0	1	7	2	3	3	1	1	0
Kandleria	0.000547616	0.000249375	0.441314	0.779162	0.000298241	-0.000503201	0.00109968	0	0	0	0	1	0	1	0	1	0	0	0	0	1	0	0	0	0
unclassified	21.2267	24.1759	0.443053	0.778507	-2.94925	-10.9284	5.02991	15823	14723	12614	8546	15587	11311	5673	17929	3496	7897	9253	16266	16139	7503	16322	15407	11534	10352
Acidaminobacter	0.000173362	0.00100563	0.444212	0.776845	-0.000832267	-0.00329551	0.00163098	0	1	0	0	0	0	0	0	0	0	0	0	4	0	0	0	0	0
Intestinibacter	0.00522282	0.00192329	0.451244	0.78542	0.00329954	-0.00597982	0.0125789	1	0	0	0	1	21	1	0	1	0	2	0	0	1	0	3	0	3
Holdemanella	0.303455	0.388501	0.452618	0.784112	-0.0850451	-0.331932	0.161842	62	143	183	91	155	261	144	247	263	104	88	159	57	282	58	401	413	160
Asteroleplasma	0.00747061	0.0103383	0.453225	0.781495	-0.00286766	-0.0109855	0.00525014	4	2	3	4	4	10	1	11	1	2	1	6	2	5	13	9	1	3
Methanobrevibacter	0.115484	0.208666	0.456443	0.783384	-0.0931828	-0.360437	0.174071	14	302	5	261	0	5	51	41	4	1	1	318	364	1	56	12	1	65
Collinsella	0.464699	0.59541	0.460159	0.786105	-0.130711	-0.504425	0.243002	81	548	219	195	109	492	240	227	328	151	52	363	90	156	419	655	314	276
Chlamydia	0.0497176	0.191163	0.468775	0.797133	-0.141445	-0.585543	0.302653	59	3	23	0	0	141	1	5	27	0	10	16	2	0	677	5	0	9
Malikia	0.000767332	0.000278838	0.473895	0.802143	0.000488493	-0.00093713	0.00191412	0	1	0	0	3	0	0	0	0	0	0	0	0	0	0	1	0	0
Brachybacterium	0.00210818	0.000753014	0.475191	0.800665	0.00135516	-0.00265855	0.00536887	0	0	0	0	0	0	2	0	10	0	0	2	0	1	0	0	0	0
Arthrobacter	0.00442476	0.00127878	0.47783	0.801451	0.00314598	-0.00630769	0.0125996	0	0	0	0	1	0	0	0	24	0	0	1	0	3	0	1	0	0
Streptococcus	6.96499	5.05174	0.479391	0.800431	1.91326	-3.68965	7.51617	444	6394	602	2500	502	11091	7223	3419	2864	2270	1763	3819	739	251	6674	3018	2634	2200
Paracoccus	0.00136437	0.000772718	0.481274	0.799956	0.000591652	-0.00114853	0.00233183	0	3	0	0	0	0	1	0	2	0	2	0	2	0	1	0	0	0
Olsenella	0.403143	0.55463	0.487531	0.806722	-0.151488	-0.615854	0.312879	45	155	361	323	53	480	27	43	227	514	41	120	15	399	140	740	346	359
Macellibacteroides	0.0315866	0.0475246	0.494489	0.814583	-0.015938	-0.0671826	0.0353066	46	2	16	10	36	15	24	7	0	12	10	26	7	91	2	2	28	33
Intestinimonas	0.254679	0.344209	0.49756	0.815999	-0.0895299	-0.383395	0.204335	177	166	67	168	105	73	202	308	20	94	126	172	208	67	539	44	202	105
Devosia	0.000372759	0.000810084	0.503412	0.821942	-0.000437325	-0.0018694	0.000994752	0	0	0	0	0	1	1	0	0	0	0	1	0	0	0	0	0	2
Anaerosphaera	0.0033462	0.000997501	0.514234	0.835913	0.00234869	-0.00528061	0.009978	0	0	0	0	0	0	0	0	19	0	0	0	0	4	0	0	0	0
Oscillibacter	1.3619	1.8011	0.519279	0.840412	-0.439205	-1.92568	1.04727	657	1640	306	818	747	952	623	1482	84	462	95	926	1578	651	2602	336	500	365
Eisenbergiella	0.000159255	0.000539807	0.52047	0.838661	-0.000380552	-0.00170918	0.000948072	0	0	1	0	0	0	0	0	0	0	0	0	0	0	2	0	0	0
Paraprevotella	0.0386986	0.0559939	0.521549	0.836746	-0.0172952	-0.0754785	0.040888	83	2	12	11	18	14	24	32	9	11	9	23	66	12	87	5	7	15
Ruminococcus2	0.444542	0.349513	0.529132	0.845237	0.0950294	-0.218188	0.408247	126	171	137	252	158	231	124	362	809	118	82	124	37	312	57	312	374	164
Veillonella	0.000493877	0.00022198	0.531239	0.844945	0.000271898	-0.000631091	0.00117489	2	0	0	0	0	0	0	1	0	0	0	0	0	0	0	0	1	0
Peptococcus	0.119989	0.172342	0.531748	0.842125	-0.0523532	-0.23084	0.126133	25	53	32	291	39	9	32	130	16	75	16	122	35	31	297	45	83	50
Finegoldia	0.00403013	0.00153823	0.532295	0.839388	0.0024919	-0.00594248	0.0109263	1	0	1	0	0	0	0	0	21	0	0	5	0	0	0	0	0	1
Butyricimonas	0.000352231	0.000779656	0.534419	0.839152	-0.000427425	-0.00189907	0.00104422	0	0	0	0	0	0	0	0	2	0	0	0	0	0	0	2	1	0
Paludibacter	0.0109754	0.00605386	0.534455	0.835652	0.00492153	-0.0116551	0.0214982	20	3	0	1	33	0	0	1	0	0	1	8	13	0	1	0	1	1
Millisia	0.00174657	0.00104985	0.535526	0.833793	0.000696718	-0.00167573	0.00306917	0	1	1	0	1	0	0	0	6	0	1	0	0	0	1	1	1	1
Aquisphaera	0.000159272	0.000498751	0.53674	0.832172	-0.000339479	-0.00156921	0.000890251	0	0	0	0	0	0	0	0	0	0	1	0	0	2	0	0	0	0
Subdoligranulum	0.000199248	0.000557676	0.562747	0.868844	-0.000358428	-0.00173815	0.0010213	0	0	0	0	0	1	0	0	0	0	0	0	0	0	0	2	0	0
Halomonas	0.000597745	0.00022198	0.566108	0.870391	0.000375766	-0.00100679	0.00175832	0	0	0	0	0	3	0	0	0	0	0	0	0	0	0	0	1	0
Bacillus	0.00121066	0.000780244	0.570367	0.8733	0.000430416	-0.00116223	0.00202306	1	0	1	1	2	0	0	0	0	0	2	0	0	0	0	0	1	2
Clostridium XI	0.150569	0.172839	0.574278	0.875656	-0.0222701	-0.107429	0.0628891	51	62	113	87	32	122	81	44	101	49	130	105	33	70	50	143	122	144
Mobiluncus	0.00353091	0.00163788	0.582643	0.884754	0.00189303	-0.00539139	0.00917745	1	1	20	0	0	0	0	0	0	0	0	0	0	0	4	0	0	2
Pirellula	0.000653931	0.000993078	0.583461	0.882365	-0.000339147	-0.0016242	0.000945905	0	0	0	0	0	0	0	0	1	0	3	1	0	1	1	0	1	0
Coprobacillus	0.000173362	0.000443959	0.586047	0.882659	-0.000270597	-0.00137308	0.000831885	0	1	0	0	0	0	0	0	0	0	0	0	0	0	0	0	2	0
Moraxella	0.00123281	0.000519279	0.587298	0.880947	0.00071353	-0.00208567	0.00351273	0	0	0	0	0	0	0	0	7	0	0	0	0	1	1	0	0	0
Anaerostipes	0.0356178	0.0468799	0.597894	0.893211	-0.0112621	-0.0562778	0.0337536	2	0	66	11	15	55	1	9	9	8	28	11	5	23	2	58	63	23
Bosea	0.000502379	0.000771098	0.605485	0.900903	-0.000268719	-0.00135509	0.000817652	0	0	0	2	0	0	1	0	0	0	0	1	0	1	1	0	0	0
Roseburia	0.434715	0.544044	0.617141	0.914558	-0.109329	-0.587493	0.368834	254	14	216	81	474	100	291	378	107	135	481	52	112	255	36	746	457	430
Senegalimassilia	0.0879087	0.135064	0.617409	0.911295	-0.0471557	-0.253218	0.158906	10	16	31	54	7	210	9	15	104	18	6	44	7	28	58	317	19	25
Sphingomonas	0.000511157	0.000279132	0.62262	0.915325	0.000232025	-0.000748151	0.0012122	0	2	0	1	0	0	0	0	0	0	0	0	0	0	0	0	0	1
Enteractinococcus	0.0019115	0.00127183	0.62808	0.919689	0.000639668	-0.00214775	0.00342709	1	0	0	0	1	0	0	1	7	0	1	0	0	0	1	1	2	1
Citrobacter	0.000833418	0.00125628	0.636101	0.927752	-0.000422858	-0.00234672	0.001501	0	0	0	0	0	0	0	2	2	1	0	3	0	0	0	1	1	0
Clostridium XlVb	0.0325641	0.0252358	0.659328	0.957843	0.00732828	-0.0275955	0.042252	5	3	8	1	16	2	90	15	13	6	31	22	5	20	3	2	23	25
Acinetobacter	0.00969126	0.00700707	0.664642	0.961776	0.00268419	-0.0102799	0.0156483	0	0	1	1	4	1	3	13	11	0	25	1	3	19	2	0	2	1
Porphyromonas	0.000519171	0.000818939	0.666021	0.960007	-0.000299768	-0.00178666	0.00118712	1	2	0	0	0	0	0	0	0	0	0	0	0	0	2	0	0	1
Alistipes	0.0101789	0.00774935	0.667621	0.958568	0.00242955	-0.00945247	0.0143116	9	0	0	20	8	0	1	15	0	3	5	7	0	0	16	0	5	2
Bulleidia	0.24557	0.211239	0.676024	0.966871	0.0343302	-0.140024	0.208684	104	85	109	62	139	161	74	389	28	160	130	47	33	90	40	113	319	199
Jeotgalibaca	0.000863734	0.000498751	0.678666	0.966902	0.000364983	-0.00146954	0.0021995	0	0	0	0	0	0	0	0	4	0	1	0	0	2	0	0	0	0
Methanothrix	0.000148982	0.000278838	0.690412	0.979854	-0.000129856	-0.000839837	0.000580125	0	0	0	0	0	0	0	1	0	0	0	0	0	0	0	1	0	0
Thermomonas	0.000332782	0.000491883	0.690716	0.97653	-0.000159101	-0.00101181	0.000693613	0	0	0	0	0	0	1	0	0	0	1	0	0	0	1	0	1	0
Schwartzia	0.0201771	0.014811	0.696532	0.980994	0.00536612	-0.023785	0.0345172	71	0	7	0	2	27	0	7	0	0	0	18	17	3	5	4	0	10
Corynebacterium	0.598959	0.73782	0.697044	0.977982	-0.138862	-0.88274	0.605017	218	291	248	10	146	386	70	36	1588	95	310	462	141	196	159	903	173	731
Fusicatenibacter	0.00625209	0.00757396	0.719645	1	-0.00132187	-0.00905487	0.00641113	0	1	4	2	2	3	1	0	12	10	0	1	3	6	0	11	4	4
Ralstonia	0.000477765	0.000278838	0.724135	1	0.000198927	-0.00097974	0.00137759	0	0	3	0	0	0	0	0	0	0	0	0	0	0	0	1	0	0
Enterorhabdus	0.111824	0.1454	0.726397	1	-0.0335752	-0.240027	0.172877	6	95	29	20	23	263	3	25	83	50	9	62	10	36	64	314	33	22
Clostridium III	0.0066712	0.00578217	0.730929	1	0.000889028	-0.00453472	0.00631278	3	2	0	4	8	8	1	1	0	9	0	4	2	3	5	5	1	2
Holdemania	0.268703	0.302614	0.734831	1	-0.033911	-0.249602	0.18178	228	83	284	54	89	282	62	136	75	120	131	415	70	81	211	158	71	156
Coprococcus	0.429982	0.389464	0.736267	1	0.0405184	-0.215429	0.296466	174	87	400	147	152	84	304	178	176	376	446	104	201	187	72	137	533	323
Pyramidobacter	0.000322493	0.000503639	0.749394	1	-0.000181146	-0.0014388	0.00107651	0	0	0	0	0	0	1	1	0	0	0	2	0	0	0	0	0	0
Nesterenkonia	0.000176116	0.000279132	0.760937	1	-0.000103017	-0.000831858	0.000625824	0	0	0	0	0	0	0	0	1	0	0	0	0	0	0	0	0	1
Vasilyevaea	0.000173362	0.000269903	0.76913	1	-9.65417e-05	-0.000803672	0.000610589	0	1	0	0	0	0	0	0	0	0	0	0	0	0	1	0	0	0
Desulfovibrio	0.00506957	0.00643323	0.769434	1	-0.00136366	-0.0116406	0.00891329	5	1	0	0	0	3	1	2	11	3	3	1	17	0	5	1	0	1
Methanomassiliicoccus	0.00050223	0.000754222	0.769643	1	-0.000251992	-0.00214827	0.00164429	0	1	0	2	0	0	0	0	0	0	0	0	3	0	0	0	0	0
Caulobacter	0.00037261	0.000491883	0.773762	1	-0.000119273	-0.000998517	0.000759971	0	1	0	0	0	1	0	0	0	0	0	0	0	0	1	0	1	0
Defluviimonas	0.000346972	0.000249375	0.780041	1	9.75971e-05	-0.000635622	0.000830816	0	0	0	0	1	0	0	1	0	0	0	0	0	1	0	0	0	0
Akkermansia	0.00241793	0.00167479	0.793351	1	0.000743138	-0.00517131	0.00665759	13	0	0	0	0	0	0	0	1	0	0	0	0	0	0	0	0	6
Oligosphaera	0.000172447	0.000251407	0.800233	1	-7.89599e-05	-0.000746743	0.000588823	1	0	0	0	0	0	0	0	0	0	0	0	1	0	0	0	0	0
Parasutterella	0.000172447	0.000249375	0.804176	1	-7.69279e-05	-0.000740537	0.000586682	1	0	0	0	0	0	0	0	0	0	0	0	0	1	0	0	0	0
Treponema	1.74477	2.22223	0.812464	1	-0.477457	-5.01864	4.06373	911	440	101	2276	795	86	1243	4143	10	108	578	223	7494	39	820	35	70	92
Megamonas	0.000199248	0.000278838	0.820321	1	-7.95897e-05	-0.000827416	0.000668237	0	0	0	0	0	1	0	0	0	0	0	0	0	0	0	1	0	0
Syntrophococcus	0.000183222	0.000251819	0.829357	1	-6.85977e-05	-0.000747039	0.000609843	0	0	0	0	0	0	0	0	0	1	0	1	0	0	0	0	0	0
Christensenella	0.00862282	0.00799333	0.833211	1	0.000629493	-0.00563481	0.0068938	5	4	3	4	11	2	2	12	2	3	2	0	5	7	9	4	4	2
Weissella	0.000867734	0.000723091	0.833248	1	0.000144642	-0.00129578	0.00158506	2	2	0	0	0	0	0	0	1	0	0	0	0	0	0	0	2	1
Dokdonella	0.00019799	0.000269903	0.833475	1	-7.19133e-05	-0.000800614	0.000656787	0	0	0	0	1	0	0	0	0	0	0	0	0	0	1	0	0	0
Clostridium XlVa	1.29051	1.39203	0.846399	1	-0.101519	-1.22328	1.02024	721	197	1537	303	1400	144	520	751	61	904	961	2152	878	436	611	288	431	644
Mesorhizobium	0.000630581	0.000753014	0.848661	1	-0.000122433	-0.00150066	0.0012558	0	1	1	0	0	0	0	2	0	0	0	2	0	1	0	0	0	0
Anaerosporobacter	0.001749	0.00150674	0.84998	1	0.000242258	-0.00246834	0.00295286	1	3	0	1	1	0	4	0	0	0	0	0	4	0	0	0	1	1
Atopostipes	0.00474151	0.00377039	0.856893	1	0.000971124	-0.0102703	0.0122125	3	0	0	0	0	0	1	0	23	0	0	0	0	14	0	0	0	1
Anaerophaga	0.000172447	0.00022198	0.862914	1	-4.95321e-05	-0.000658454	0.00055939	1	0	0	0	0	0	0	0	0	0	0	0	0	0	0	0	1	0
Anaerocella	0.349291	0.300573	0.8727	1	0.0487177	-0.597139	0.694575	219	239	3	11	871	0	522	15	0	0	16	3	960	0	15	0	220	20
Actinomyces	0.000877929	0.00103169	0.872961	1	-0.00015376	-0.00223453	0.00192701	0	0	1	0	0	0	0	0	2	2	0	0	0	0	3	0	1	0
Stenotrophomonas	0.000176116	0.00022198	0.87393	1	-4.5864e-05	-0.000658645	0.000566917	0	0	0	0	0	0	0	0	1	0	0	0	0	0	0	0	1	0
Rothia	0.000176116	0.00022198	0.87393	1	-4.5864e-05	-0.000658645	0.000566917	0	0	0	0	0	0	0	0	1	0	0	0	0	0	0	0	1	0
Anaerofilum	0.0036805	0.0039635	0.876213	1	-0.000282996	-0.00414348	0.00357749	2	0	4	1	1	4	0	3	1	5	0	2	2	0	6	3	1	1
Bacteroides	0.0268067	0.024817	0.899553	1	0.0019897	-0.0309014	0.0348808	73	9	5	9	18	0	10	3	1	0	28	46	7	9	15	7	7	6
Levilinea	0.000313417	0.000269903	0.900841	1	4.35133e-05	-0.000697787	0.000784814	0	0	0	1	0	0	0	1	0	0	0	0	0	0	1	0	0	0
Clostridium XVIII	0.0660893	0.0709072	0.904595	1	-0.00481784	-0.0936439	0.0840083	49	16	23	68	35	6	14	50	1	94	29	9	5	41	5	22	176	38
Anaerofustis	0.00238433	0.00224974	0.928139	1	0.000134593	-0.0030515	0.00332069	1	3	0	1	2	2	0	0	0	4	0	0	5	0	1	1	2	0
Erysipelothrix	0.107714	0.110634	0.93121	1	-0.00291971	-0.0737874	0.0679479	149	97	20	39	56	28	70	97	14	20	39	107	10	58	36	47	77	96
Leucobacter	0.000548726	0.000503639	0.939417	1	4.50868e-05	-0.00124639	0.00133657	0	1	0	0	0	1	0	0	1	0	0	2	0	0	0	0	0	0
Sporobacter	1.98197	1.91592	0.945371	1	0.066051	-1.95633	2.08843	3280	396	790	847	2887	1068	455	347	32	304	667	1480	1514	305	550	188	3463	419
Anaeroplasma	0.0131374	0.0127206	0.953084	1	0.000416841	-0.0145316	0.0153653	22	4	1	11	4	0	2	24	0	9	2	18	7	0	17	0	2	5
Pseudomonas	0.000744543	0.000723174	0.9694	1	2.13687e-05	-0.00114125	0.00118398	1	0	0	0	2	0	0	0	1	0	0	1	0	1	0	0	1	0
Sutterella	0.00203285	0.00205245	0.98569	1	-1.96037e-05	-0.00231069	0.00227148	0	1	1	1	0	0	0	1	1	4	3	1	0	1	1	0	2	3
Catenibacterium	0.269816	0.27044	0.997399	1	-0.00062413	-0.423208	0.42196	16	79	66	286	29	256	36	376	362	53	21	91	75	84	27	651	11	59
Lachnospiracea_incertae_sedis	5.68699	5.69374	0.99772	1	-0.00675292	-4.99926	4.98576	2930	8238	2359	7950	2398	1668	474	1461	600	3402	1473	7542	1368	864	4970	4049	388	2431
Saccharibacteria_genera_incertae_sedis	0.233805	0.233999	0.998825	1	-0.000194488	-0.276419	0.27603	175	19	621	39	205	4	80	162	28	54	5	324	37	132	74	12	38	281
Aerococcus	0	0	1	1	0	0	0	0	0	0	0	0	0	0	0	0	0	0	0	0	0	0	0	0	0
Raoultella	0	0	1	1	0	0	0	0	0	0	0	0	0	0	0	0	0	0	0	0	0	0	0	0	0
Janthinobacterium	0	0	1	1	0	0	0	0	0	0	0	0	0	0	0	0	0	0	0	0	0	0	0	0	0
Dechloromonas	0	0	1	1	0	0	0	0	0	0	0	0	0	0	0	0	0	0	0	0	0	0	0	0	0
Thauera	0	0	1	1	0	0	0	0	0	0	0	0	0	0	0	0	0	0	0	0	0	0	0	0	0
Lactococcus	0	0	1	1	0	0	0	0	0	0	0	0	0	0	0	0	0	0	0	0	0	0	0	0	0
Thiobacillus	0	0	1	1	0	0	0	0	0	0	0	0	0	0	0	0	0	0	0	0	0	0	0	0	0
Anaeromyxobacter	0	0	1	1	0	0	0	0	0	0	0	0	0	0	0	0	0	0	0	0	0	0	0	0	0
Pelospora	0	0	1	1	0	0	0	0	0	0	0	0	0	0	0	0	0	0	0	0	0	0	0	0	0
Methylophaga	0	0	1	1	0	0	0	0	0	0	0	0	0	0	0	0	0	0	0	0	0	0	0	0	0
Paenibacillus	0	0	1	1	0	0	0	0	0	0	0	0	0	0	0	0	0	0	0	0	0	0	0	0	0
Providencia	0	0	1	1	0	0	0	0	0	0	0	0	0	0	0	0	0	0	0	0	0	0	0	0	0
Legionella	0	0	1	1	0	0	0	0	0	0	0	0	0	0	0	0	0	0	0	0	0	0	0	0	0
Desulfomonile	0	0	1	1	0	0	0	0	0	0	0	0	0	0	0	0	0	0	0	0	0	0	0	0	0
Ferruginibacter	0	0	1	1	0	0	0	0	0	0	0	0	0	0	0	0	0	0	0	0	0	0	0	0	0
Singulisphaera	0	0	1	1	0	0	0	0	0	0	0	0	0	0	0	0	0	0	0	0	0	0	0	0	0
Streptomyces	0	0	1	1	0	0	0	0	0	0	0	0	0	0	0	0	0	0	0	0	0	0	0	0	0
Zavarzinella	0	0	1	1	0	0	0	0	0	0	0	0	0	0	0	0	0	0	0	0	0	0	0	0	0
Mobilitalea	0	0	1	1	0	0	0	0	0	0	0	0	0	0	0	0	0	0	0	0	0	0	0	0	0
Stomatobaculum	0	0	1	1	0	0	0	0	0	0	0	0	0	0	0	0	0	0	0	0	0	0	0	0	0
Pedomicrobium	0	0	1	1	0	0	0	0	0	0	0	0	0	0	0	0	0	0	0	0	0	0	0	0	0
Blastocatella	0	0	1	1	0	0	0	0	0	0	0	0	0	0	0	0	0	0	0	0	0	0	0	0	0
Methylobacterium	0	0	1	1	0	0	0	0	0	0	0	0	0	0	0	0	0	0	0	0	0	0	0	0	0
Hathewaya	0	0	1	1	0	0	0	0	0	0	0	0	0	0	0	0	0	0	0	0	0	0	0	0	0
Hespellia	0	0	1	1	0	0	0	0	0	0	0	0	0	0	0	0	0	0	0	0	0	0	0	0	0
Paenochrobactrum	0	0	1	1	0	0	0	0	0	0	0	0	0	0	0	0	0	0	0	0	0	0	0	0	0
Lachnobacterium	0	0	1	1	0	0	0	0	0	0	0	0	0	0	0	0	0	0	0	0	0	0	0	0	0
Longilinea	0	0	1	1	0	0	0	0	0	0	0	0	0	0	0	0	0	0	0	0	0	0	0	0	0
Lactonifactor	0	0	1	1	0	0	0	0	0	0	0	0	0	0	0	0	0	0	0	0	0	0	0	0	0
Caryophanon	0	0	1	1	0	0	0	0	0	0	0	0	0	0	0	0	0	0	0	0	0	0	0	0	0
Tepidisphaera	0	0	1	1	0	0	0	0	0	0	0	0	0	0	0	0	0	0	0	0	0	0	0	0	0
Georgenia	0	0	1	1	0	0	0	0	0	0	0	0	0	0	0	0	0	0	0	0	0	0	0	0	0
Roseimicrobium	0	0	1	1	0	0	0	0	0	0	0	0	0	0	0	0	0	0	0	0	0	0	0	0	0
Tannerella	0	0	1	1	0	0	0	0	0	0	0	0	0	0	0	0	0	0	0	0	0	0	0	0	0
Serpens	0	0	1	1	0	0	0	0	0	0	0	0	0	0	0	0	0	0	0	0	0	0	0	0	0
Filomicrobium	0	0	1	1	0	0	0	0	0	0	0	0	0	0	0	0	0	0	0	0	0	0	0	0	0
Sandarakinorhabdus	0	0	1	1	0	0	0	0	0	0	0	0	0	0	0	0	0	0	0	0	0	0	0	0	0
Candidatus Cloacamonas	0	0	1	1	0	0	0	0	0	0	0	0	0	0	0	0	0	0	0	0	0	0	0	0	0
Methyloversatilis	0	0	1	1	0	0	0	0	0	0	0	0	0	0	0	0	0	0	0	0	0	0	0	0	0
Heliobacillus	0	0	1	1	0	0	0	0	0	0	0	0	0	0	0	0	0	0	0	0	0	0	0	0	0
Thiothrix	0	0	1	1	0	0	0	0	0	0	0	0	0	0	0	0	0	0	0	0	0	0	0	0	0
Syntrophomonas	0	0	1	1	0	0	0	0	0	0	0	0	0	0	0	0	0	0	0	0	0	0	0	0	0
Succiniclasticum	0	0	1	1	0	0	0	0	0	0	0	0	0	0	0	0	0	0	0	0	0	0	0	0	0
Candidatus Hydrogenedens	0	0	1	1	0	0	0	0	0	0	0	0	0	0	0	0	0	0	0	0	0	0	0	0	0
Gemmobacter	0	0	1	1	0	0	0	0	0	0	0	0	0	0	0	0	0	0	0	0	0	0	0	0	0
Aliifodinibius	0	0	1	1	0	0	0	0	0	0	0	0	0	0	0	0	0	0	0	0	0	0	0	0	0
Ohtaekwangia	0	0	1	1	0	0	0	0	0	0	0	0	0	0	0	0	0	0	0	0	0	0	0	0	0
Brachymonas	0	0	1	1	0	0	0	0	0	0	0	0	0	0	0	0	0	0	0	0	0	0	0	0	0
Gp18	0	0	1	1	0	0	0	0	0	0	0	0	0	0	0	0	0	0	0	0	0	0	0	0	0
Empedobacter	0	0	1	1	0	0	0	0	0	0	0	0	0	0	0	0	0	0	0	0	0	0	0	0	0
Nitrospira	0	0	1	1	0	0	0	0	0	0	0	0	0	0	0	0	0	0	0	0	0	0	0	0	0
Robinsoniella	0	0	1	1	0	0	0	0	0	0	0	0	0	0	0	0	0	0	0	0	0	0	0	0	0
Azospira	0	0	1	1	0	0	0	0	0	0	0	0	0	0	0	0	0	0	0	0	0	0	0	0	0
Lachnoanaerobaculum	0	0	1	1	0	0	0	0	0	0	0	0	0	0	0	0	0	0	0	0	0	0	0	0	0
Azoarcus	0	0	1	1	0	0	0	0	0	0	0	0	0	0	0	0	0	0	0	0	0	0	0	0	0
Caldilinea	0	0	1	1	0	0	0	0	0	0	0	0	0	0	0	0	0	0	0	0	0	0	0	0	0
Adlercreutzia	0	0	1	1	0	0	0	0	0	0	0	0	0	0	0	0	0	0	0	0	0	0	0	0	0
Blastopirellula	0	0	1	1	0	0	0	0	0	0	0	0	0	0	0	0	0	0	0	0	0	0	0	0	0
Acidaminococcus	0	0	1	1	0	0	0	0	0	0	0	0	0	0	0	0	0	0	0	0	0	0	0	0	0
Roseomonas	0	0	1	1	0	0	0	0	0	0	0	0	0	0	0	0	0	0	0	0	0	0	0	0	0
Methanosarcina	0	0	1	1	0	0	0	0	0	0	0	0	0	0	0	0	0	0	0	0	0	0	0	0	0

## Sheet: diff_genus_reads.L.vs.Y
diff_genus_reads.L.vs.Y
	Freq1	Freq2	pValue	qValue	Difference between means	95.0% lower CI	95.0% upper CI	ML1	ML2	ML3	ML4	ML5	ML6	ML7	ML8	ML9	ML10	MY1	MY2	MY3	MY4	MY5	MY6	MY7
Cloacibacillus	0.00143783	0	0.0103743	1	0.00143783	0.000429863	0.0024458	1	2	2	1	1	0	0	0	1	0	0	0	0	0	0	0	0
Gallicola	0.00186554	0.000279132	0.0185453	1	0.0015864	0.000311343	0.00286147	1	1	1	0	0	1	2	3	0	1	0	0	0	0	0	0	1
Faecalicoccus	0.0569565	0.181077	0.0243023	1	-0.124121	-0.22693	-0.0213119	62	16	4	83	35	3	27	24	37	26	106	14	102	64	195	153	71
Schwartzia	0.0515099	0.014811	0.0343283	1	0.0366989	0.0032573	0.0701406	56	82	4	52	16	5	8	12	40	13	18	17	3	5	4	0	10
Enterococcus	0.00610176	0.000539807	0.037438	1	0.00556196	0.000394074	0.0107298	5	1	0	2	7	0	13	0	3	3	0	0	0	2	0	0	0
Streptococcus	11.6112	5.05174	0.0540938	1	6.55944	-0.132892	13.2518	3414	3886	6729	10310	2293	7996	307	14927	2835	6798	3819	739	251	6674	3018	2634	2200
Peptoniphilus	0.00231067	0.000251819	0.0558923	1	0.00205885	-6.23351e-05	0.00418003	1	0	0	0	1	3	2	3	0	1	1	0	0	0	0	0	0
Guggenheimella	0.00204442	0	0.0668089	1	0.00204442	-0.000174562	0.0042634	0	0	0	0	0	2	5	0	2	1	0	0	0	0	0	0	0
Brevibacterium	0.0243595	0.00326521	0.0680619	1	0.0210943	-0.00188615	0.0440748	5	3	3	0	1	28	42	29	5	4	2	0	1	0	0	0	9
Parvibacter	0.0432897	0.144898	0.0707818	1	-0.101609	-0.214424	0.0112072	18	26	13	5	12	7	14	9	75	49	203	64	11	92	2	139	67
Shewanella	0	0.000752637	0.0798577	1	-0.000752637	-0.00162728	0.000122003	0	0	0	0	0	0	0	0	0	0	1	0	0	0	1	1	0
Anaerorhabdus	0.000554795	0	0.0814484	1	0.000554795	-8.504e-05	0.00119463	0	0	1	1	1	0	0	0	0	0	0	0	0	0	0	0	0
Janibacter	0.00104192	0	0.0834672	1	0.00104192	-0.000169117	0.00225295	0	0	0	0	0	1	2	0	0	2	0	0	0	0	0	0	0
Slackia	0.042608	0.139977	0.0881379	1	-0.0973691	-0.213695	0.0189569	8	3	28	55	22	18	15	74	3	3	15	7	144	24	155	54	132
Pseudocitrobacter	0.000678165	0	0.0916076	1	0.000678165	-0.000134335	0.00149066	0	0	1	0	0	1	0	0	1	0	0	0	0	0	0	0	0
Escherichia/Shigella	1.31498	0.561561	0.0928279	1	0.753417	-0.141369	1.6482	709	348	644	524	1834	140	1569	345	887	158	134	50	20	129	794	185	763
Hydrogenoanaerobacterium	0.00501903	0.00848772	0.102069	1	-0.00346869	-0.00774242	0.00080504	7	5	1	1	0	1	4	3	4	2	4	8	3	8	3	4	3
Bacillus	0.0105986	0.000780244	0.106209	1	0.00981836	-0.00254368	0.0221804	32	18	0	2	1	0	6	2	0	2	0	0	0	0	0	1	2
Salinicoccus	0.0116936	0.00075057	0.106804	1	0.0109431	-0.00286603	0.0247522	3	2	0	2	1	21	13	1	3	5	1	0	2	0	0	0	0
Acidaminococcus	0.000688514	0	0.107911	1	0.000688514	-0.000184023	0.00156105	1	1	0	2	0	0	0	0	0	0	0	0	0	0	0	0	0
Anaeroplasma	0.00260547	0.0127206	0.10851	1	-0.0101151	-0.0230935	0.00286328	2	0	0	0	0	0	2	0	9	1	18	7	0	17	0	2	5
Serpens	0.00182306	0	0.123124	1	0.00182306	-0.000601193	0.00424732	0	0	0	0	1	0	5	0	4	0	0	0	0	0	0	0	0
Olsenella	0.226807	0.55463	0.127734	1	-0.327823	-0.771301	0.115654	74	27	105	280	56	265	23	215	22	30	120	15	399	140	740	346	359
Lutispora	0.00721332	0.00150927	0.128334	1	0.00570405	-0.0019381	0.0133462	13	1	0	0	0	0	5	7	15	0	2	4	0	0	0	0	0
Tessaracoccus	0.000883951	0	0.130298	1	0.000883951	-0.000317138	0.00208504	0	1	0	0	0	0	3	0	0	1	0	0	0	0	0	0	0
Comamonas	0.00158399	0	0.132469	1	0.00158399	-0.000582122	0.00375011	0	0	0	5	0	0	0	3	1	0	0	0	0	0	0	0	0
Bifidobacterium	0.00246852	0.0066986	0.140902	1	-0.00423008	-0.010199	0.00173881	2	0	1	1	5	1	0	3	0	0	5	0	11	4	3	1	2
Citrobacter	0	0.00125628	0.14151	1	-0.00125628	-0.00307259	0.000560043	0	0	0	0	0	0	0	0	0	0	3	0	0	0	1	1	0
Kandleria	0.00117783	0.000249375	0.152398	1	0.000928452	-0.000394153	0.00225106	0	0	0	0	0	1	1	3	0	1	0	0	1	0	0	0	0
Holdemanella	0.218645	0.388501	0.154975	1	-0.169856	-0.417932	0.0782201	81	15	192	247	165	114	70	179	28	50	159	57	282	58	401	413	160
Anaerofilum	0.00689093	0.0039635	0.155704	1	0.00292743	-0.00125604	0.00711089	8	0	3	5	5	3	6	4	3	0	2	2	0	6	3	1	1
Barnesiella	7.42849	3.26841	0.157093	1	4.16008	-1.82638	10.1465	6638	12892	119	590	1953	857	1027	1173	9124	6144	2965	4992	755	3046	269	334	384
Flavobacterium	0.0018933	0	0.157998	1	0.0018933	-0.000888214	0.00467481	0	0	0	0	0	0	0	3	1	6	0	0	0	0	0	0	0
Brachybacterium	0.00474265	0.000753014	0.160911	1	0.00398963	-0.00188989	0.00986915	1	0	0	0	0	7	11	0	2	1	2	0	1	0	0	0	0
Helicobacter	0.00278617	0.00693595	0.162134	1	-0.00414977	-0.0102571	0.00195758	1	0	1	1	2	0	9	2	0	0	6	2	2	10	3	4	0
Collinsella	0.362541	0.59541	0.162952	1	-0.232869	-0.581486	0.115748	247	72	116	284	118	180	128	416	255	100	363	90	156	419	655	314	276
Lysobacter	0.000392475	0	0.167899	1	0.000392475	-0.000199493	0.000984442	0	0	0	0	0	0	0	0	1	1	0	0	0	0	0	0	0
Syntrophomonas	0.000359341	0	0.167905	1	0.000359341	-0.00018266	0.000901342	0	0	1	1	0	0	0	0	0	0	0	0	0	0	0	0	0
Gp18	0.000359341	0	0.167905	1	0.000359341	-0.00018266	0.000901342	0	0	1	1	0	0	0	0	0	0	0	0	0	0	0	0	0
Catenisphaera	0.000332698	0	0.168018	1	0.000332698	-0.000169266	0.000834661	1	0	0	0	0	0	1	0	0	0	0	0	0	0	0	0	0
Tannerella	0.000334575	0	0.168095	1	0.000334575	-0.000170322	0.000839473	1	1	0	0	0	0	0	0	0	0	0	0	0	0	0	0	0
Caryophanon	0.000369787	0	0.169241	1	0.000369787	-0.000189923	0.000929497	0	0	0	0	0	0	1	0	0	1	0	0	0	0	0	0	0
Actinotalea	0.000369787	0	0.169241	1	0.000369787	-0.000189923	0.000929497	0	0	0	0	0	0	1	0	0	1	0	0	0	0	0	0	0
Ornithinimicrobium	0.000369787	0	0.169241	1	0.000369787	-0.000189923	0.000929497	0	0	0	0	0	0	1	0	0	1	0	0	0	0	0	0	0
Trichococcus	0.000739574	0	0.169241	1	0.000739574	-0.000379846	0.00185899	0	0	0	0	0	0	2	0	0	2	0	0	0	0	0	0	0
Caldilinea	0.000367591	0	0.169484	1	0.000367591	-0.000189148	0.00092433	0	0	0	0	0	0	0	1	0	1	0	0	0	0	0	0	0
Murimonas	0.000367591	0	0.169484	1	0.000367591	-0.000189148	0.00092433	0	0	0	0	0	0	0	1	0	1	0	0	0	0	0	0	0
Mycobacterium	0	0.000501195	0.172314	1	-0.000501195	-0.00129283	0.000290443	0	0	0	0	0	0	0	0	0	0	1	0	1	0	0	0	0
Parvularcula	0	0.000519279	0.172708	1	-0.000519279	-0.00134036	0.000301806	0	0	0	0	0	0	0	0	0	0	0	0	1	1	0	0	0
Moraxella	0	0.000519279	0.172708	1	-0.000519279	-0.00134036	0.000301806	0	0	0	0	0	0	0	0	0	0	0	0	1	1	0	0	0
Gardnerella	0	0.000530952	0.172984	1	-0.000530952	-0.00137113	0.000309225	0	0	0	0	0	0	0	0	0	0	1	0	0	0	0	0	1
Oxalobacter	0.0339928	0.00387294	0.175221	1	0.0301199	-0.0161094	0.0763492	129	15	0	7	10	0	1	1	33	3	1	9	0	4	1	0	0
Reyranella	0.000501368	0	0.17784	1	0.000501368	-0.000274556	0.00127729	0	0	0	0	0	1	0	0	0	1	0	0	0	0	0	0	0
Allofustis	0.000479312	0	0.183813	1	0.000479312	-0.000273817	0.00123244	0	0	0	1	0	1	0	0	0	0	0	0	0	0	0	0	0
Bulleidia	0.112015	0.211239	0.185882	1	-0.0992242	-0.258258	0.0598098	28	14	125	84	49	38	133	56	26	46	47	33	90	40	113	319	199
Anaerostipes	0.019913	0.0468799	0.1917	1	-0.0269668	-0.0696812	0.0157476	13	2	60	19	1	0	5	9	1	2	11	5	23	2	58	63	23
Lysinibacillus	0	0.000777589	0.192189	1	-0.000777589	-0.00207271	0.000517533	0	0	0	0	0	0	0	0	0	0	0	0	2	0	1	0	0
Terrimonas	0.000507894	0	0.192575	1	0.000507894	-0.000307815	0.0013236	0	0	0	0	0	0	1	2	0	0	0	0	0	0	0	0	0
Aliifodinibius	0.000591499	0	0.195311	1	0.000591499	-0.000364927	0.00154793	0	0	0	0	0	0	0	0	1	2	0	0	0	0	0	0	0
Kurthia	0.00141705	0	0.195892	1	0.00141705	-0.000877529	0.00371162	0	0	0	0	0	0	6	0	1	1	0	0	0	0	0	0	0
Azospira	0.000522504	0	0.196681	1	0.000522504	-0.000325212	0.00137022	0	0	0	2	0	0	0	1	0	0	0	0	0	0	0	0	0
Luteimonas	0.0041248	0.00075057	0.199	1	0.00337423	-0.00209749	0.00884595	0	0	0	0	0	1	5	0	3	12	1	0	2	0	0	0	0
Clostridium XVIII	0.0197453	0.0709072	0.200642	1	-0.0511619	-0.137742	0.0354185	20	4	4	3	5	0	22	26	24	4	9	5	41	5	22	176	38
Thermogutta	0	0.00082758	0.201928	1	-0.00082758	-0.00224103	0.000585875	0	0	0	0	0	0	0	0	0	0	0	0	0	1	2	0	0
Clostridium III	0.0113362	0.00578217	0.21225	1	0.00555402	-0.00370405	0.0148121	8	26	2	3	6	0	7	2	7	3	4	2	3	5	5	1	2
Flaviflexus	0.00373516	0.000498751	0.213778	1	0.00323641	-0.00220316	0.00867598	0	1	0	0	0	0	14	0	4	2	0	0	2	0	0	0	0
Psychrobacter	0.0119838	0.00303051	0.216624	1	0.00895332	-0.00615696	0.0240636	0	0	1	0	0	6	39	0	10	7	1	3	7	0	1	0	0
Anaerovorax	0.0925613	0.163103	0.219281	1	-0.0705413	-0.192197	0.0511144	46	12	48	27	97	76	36	64	20	34	31	26	74	189	135	165	18
Ercella	0.000850931	0.000269903	0.219851	1	0.000581028	-0.000386565	0.00154862	0	0	1	0	1	1	1	0	0	0	0	0	0	1	0	0	0
Georgenia	0.000684926	0	0.222038	1	0.000684926	-0.000496146	0.001866	0	1	0	0	0	0	3	0	0	0	0	0	0	0	0	0	0
Weissella	0.00343183	0.000723091	0.222298	1	0.00270874	-0.00192862	0.0073461	2	0	1	4	0	0	12	1	0	0	0	0	0	0	0	2	1
Youngiibacter	0.000803711	0	0.22383	1	0.000803711	-0.000588044	0.00219547	0	0	0	0	0	2	0	0	0	1	0	0	0	0	0	0	0
Truepera	0	0.00102536	0.225262	1	-0.00102536	-0.00288179	0.000831066	0	0	0	0	0	0	0	0	0	0	3	0	0	1	0	0	0
Thiothrix	0.00442664	0	0.231818	1	0.00442664	-0.00338328	0.0122366	0	0	0	0	0	0	20	6	0	0	0	0	0	0	0	0	0
Heliobacillus	0.000781656	0	0.232706	1	0.000781656	-0.000600268	0.00216358	0	0	0	1	0	2	0	0	0	0	0	0	0	0	0	0	0
Pseudomonas	0.00224824	0.000723174	0.233745	1	0.00152506	-0.00114679	0.00419691	0	0	0	1	0	1	0	0	4	5	1	0	1	0	0	1	0
Jeotgalicoccus	0.0129319	0.0043242	0.234193	1	0.00860771	-0.00654589	0.0237613	2	5	1	0	0	8	40	1	8	3	7	2	3	3	1	1	0
Vampirovibrio	0.37006	0.978848	0.23518	1	-0.608788	-1.73253	0.51495	425	230	45	297	112	185	306	125	168	86	444	554	275	174	1877	111	230
Aeromonas	0.00190711	0.0081058	0.235195	1	-0.00619869	-0.0174768	0.00507941	0	0	0	2	0	0	0	0	7	1	13	0	0	0	3	18	0
Cetobacterium	0.00116627	0.00991229	0.236344	1	-0.00874602	-0.0249254	0.0074334	0	0	0	0	0	0	0	0	5	1	27	0	0	0	4	9	0
Methyloversatilis	0.000851233	0	0.240793	1	0.000851233	-0.000682091	0.00238456	0	0	0	1	0	0	0	4	0	0	0	0	0	0	0	0	0
Mycoplasma	0.000816308	0	0.241416	1	0.000816308	-0.000656216	0.00228883	4	0	0	0	0	0	0	1	0	0	0	0	0	0	0	0	0
Caulobacter	0.00294077	0.000491883	0.248094	1	0.00244889	-0.00201816	0.00691593	0	0	0	0	0	0	0	0	8	7	0	0	0	1	0	1	0
Dietzia	0.0926083	0.0500381	0.252708	1	0.0425702	-0.0340477	0.119188	43	22	17	13	6	91	109	133	7	27	36	16	5	38	16	4	72
Clostridium XlVa	2.48799	1.39203	0.253538	1	1.09596	-0.885299	3.07723	5501	2143	271	413	1179	121	1720	947	1709	270	2152	878	436	611	288	431	644
Ruminococcus2	0.228195	0.349513	0.253825	1	-0.121318	-0.344731	0.102095	105	34	278	239	63	64	104	244	57	54	124	37	312	57	312	374	164
Serratia	0	0.00153823	0.26227	1	-0.00153823	-0.00458076	0.00150431	0	0	0	0	0	0	0	0	0	0	5	0	0	0	0	0	1
Globicatella	0.0057379	0.00128793	0.265518	1	0.00444997	-0.00396062	0.0128606	0	0	0	0	0	2	22	0	3	4	0	0	3	2	0	0	0
Helcococcus	0.0040488	0.0017501	0.273627	1	0.0022987	-0.00201465	0.00661205	0	0	2	2	0	2	9	0	1	5	1	1	5	0	0	0	0
Fastidiosipila	0.00141705	0.000249375	0.289586	1	0.00116767	-0.00115764	0.00349299	0	0	0	0	0	0	6	0	1	1	0	0	1	0	0	0	0
Anaerovibrio	0.0104892	0.00509875	0.304473	1	0.00539043	-0.00564168	0.0164225	13	4	0	0	3	0	2	2	25	8	5	6	0	1	1	3	4
Paraeggerthella	0.00341136	0.00570436	0.304525	1	-0.002293	-0.0069231	0.00233709	2	2	0	1	1	1	9	2	1	0	2	1	2	7	5	4	1
Blautia	0.66643	1.05629	0.307218	1	-0.389863	-1.19479	0.415066	146	74	456	1086	147	420	401	598	69	82	233	69	1022	120	1142	889	635
Selenomonas	0.00182421	0.00368396	0.312484	1	-0.00185975	-0.00578937	0.00206987	2	0	2	3	0	2	0	0	0	0	1	3	0	6	3	1	0
Alistipes	0.0179856	0.00774935	0.316736	1	0.0102362	-0.0110596	0.0315321	53	1	0	8	26	1	3	2	2	6	7	0	0	16	0	5	2
Devosia	0.000170762	0.000810084	0.319985	1	-0.000639322	-0.00204983	0.000771182	0	0	0	0	0	0	1	0	0	0	1	0	0	0	0	0	2
Ralstonia	0.000967493	0.000278838	0.322315	1	0.000688655	-0.000761962	0.00213927	0	0	0	1	0	0	0	0	1	3	0	0	0	0	1	0	0
Nitrosomonas	0.00289027	0.00177788	0.327781	1	0.00111239	-0.00123198	0.00345677	2	0	1	1	5	1	2	0	2	1	3	1	0	1	0	1	1
Actinomyces	0.000168566	0.00103169	0.330237	1	-0.000863124	-0.00283212	0.00110587	0	0	0	0	0	0	0	1	0	0	0	0	0	3	0	1	0
Subdivision5_genera_incertae_sedis	0.196673	0.564587	0.332181	1	-0.367915	-1.20885	0.473023	538	154	10	26	87	67	60	23	93	36	280	541	0	1298	0	21	11
Yaniella	0.000706919	0.000249375	0.333874	1	0.000457543	-0.000521486	0.00143657	0	0	0	0	0	0	1	2	0	1	0	0	1	0	0	0	0
Alloprevotella	0.037445	0.0632465	0.33468	1	-0.0258015	-0.0839761	0.0323731	30	37	10	8	49	3	10	8	24	24	56	95	9	58	10	3	14
Prevotella	0.561912	0.714461	0.342144	1	-0.152549	-0.493442	0.188344	439	624	111	354	350	166	238	287	314	160	408	704	266	542	440	175	217
Azoarcus	0.000505698	0	0.343436	1	0.000505698	-0.00063827	0.00164966	0	0	0	0	0	0	0	3	0	0	0	0	0	0	0	0	0
Candidatus Hydrogenedens	0.000176969	0	0.343436	0.960061	0.000176969	-0.000223363	0.000577301	0	0	0	1	0	0	0	0	0	0	0	0	0	0	0	0	0
Ornithinicoccus	0.000341524	0	0.343436	1	0.000341524	-0.000431057	0.00111411	0	0	0	0	0	0	2	0	0	0	0	0	0	0	0	0	0
Phreatobacter	0.000176969	0	0.343436	1	0.000176969	-0.000223363	0.000577301	0	0	0	1	0	0	0	0	0	0	0	0	0	0	0	0	0
Gordonia	0.00017264	0	0.343436	1	0.00017264	-0.000217899	0.000563179	0	1	0	0	0	0	0	0	0	0	0	0	0	0	0	0	0
Roseimicrobium	0.000337132	0	0.343436	1	0.000337132	-0.000425513	0.00109978	0	0	0	0	0	0	0	2	0	0	0	0	0	0	0	0	0
Ohtaekwangia	0.000505698	0	0.343436	1	0.000505698	-0.00063827	0.00164966	0	0	0	0	0	0	0	3	0	0	0	0	0	0	0	0	0
Blastopirellula	0.000341524	0	0.343436	1	0.000341524	-0.000431057	0.00111411	0	0	0	0	0	0	2	0	0	0	0	0	0	0	0	0	0
Oligella	0.00019345	0	0.343436	1	0.00019345	-0.000244164	0.000631064	0	0	0	0	0	0	0	0	1	0	0	0	0	0	0	0	0
Rhodococcus	0.000170762	0	0.343436	1	0.000170762	-0.000215529	0.000557053	0	0	0	0	0	0	1	0	0	0	0	0	0	0	0	0	0
Roseibacillus	0.000341524	0	0.343436	1	0.000341524	-0.000431057	0.00111411	0	0	0	0	0	0	2	0	0	0	0	0	0	0	0	0	0
Porphyrobacter	0.000199025	0	0.343436	0.997859	0.000199025	-0.000251201	0.00064925	0	0	0	0	0	0	0	0	0	1	0	0	0	0	0	0	0
Fusobacterium	0.000323871	0	0.343436	1	0.000323871	-0.000408776	0.00105652	2	0	0	0	0	0	0	0	0	0	0	0	0	0	0	0	0
Filomicrobium	0.00039805	0	0.343436	0.990063	0.00039805	-0.000502401	0.0012985	0	0	0	0	0	0	0	0	0	2	0	0	0	0	0	0	0
Adlercreutzia	0.00019345	0	0.343436	0.918319	0.00019345	-0.000244164	0.000631064	0	0	0	0	0	0	0	0	1	0	0	0	0	0	0	0	0
Sanguibacter	0.000512286	0	0.343436	1	0.000512286	-0.000646586	0.00167116	0	0	0	0	0	0	3	0	0	0	0	0	0	0	0	0	0
Jonesia	0.000170762	0	0.343436	1	0.000170762	-0.000215529	0.000557053	0	0	0	0	0	0	1	0	0	0	0	0	0	0	0	0	0
Proteiniphilum	0.000390907	0	0.343436	1	0.000390907	-0.000493387	0.0012752	0	0	0	0	2	0	0	0	0	0	0	0	0	0	0	0	0
Empedobacter	0.000199025	0	0.343436	0.945732	0.000199025	-0.000251201	0.00064925	0	0	0	0	0	0	0	0	0	1	0	0	0	0	0	0	0
Nitrospira	0.000161935	0	0.343436	0.938726	0.000161935	-0.000204388	0.000528259	1	0	0	0	0	0	0	0	0	0	0	0	0	0	0	0	0
Robinsoniella	0.00019345	0	0.343436	0.931824	0.00019345	-0.000244164	0.000631064	0	0	0	0	0	0	0	0	1	0	0	0	0	0	0	0	0
Brachymonas	0.000182372	0	0.343436	0.952842	0.000182372	-0.000230182	0.000594926	0	0	1	0	0	0	0	0	0	0	0	0	0	0	0	0	0
Nitrolancea	0.000170762	0	0.343436	1	0.000170762	-0.000215529	0.000557053	0	0	0	0	0	0	1	0	0	0	0	0	0	0	0	0	0
Lachnoanaerobaculum	0.000161935	0	0.343436	0.925022	0.000161935	-0.000204388	0.000528259	1	0	0	0	0	0	0	0	0	0	0	0	0	0	0	0	0
Aerococcus	0.000341524	0	0.343436	1	0.000341524	-0.000431057	0.00111411	0	0	0	0	0	0	2	0	0	0	0	0	0	0	0	0	0
Candidatus Cloacamonas	0.000364744	0	0.343436	1	0.000364744	-0.000460364	0.00118985	0	0	2	0	0	0	0	0	0	0	0	0	0	0	0	0	0
Roseomonas	0.000170762	0	0.343436	0.911712	0.000170762	-0.000215529	0.000557053	0	0	0	0	0	0	1	0	0	0	0	0	0	0	0	0	0
Arcanobacterium	0.000170762	0	0.343436	1	0.000170762	-0.000215529	0.000557053	0	0	0	0	0	0	1	0	0	0	0	0	0	0	0	0	0
Neorhizobium	0.000170762	0	0.343436	0.974831	0.000170762	-0.000215529	0.000557053	0	0	0	0	0	0	1	0	0	0	0	0	0	0	0	0	0
Petrimonas	0.000170762	0	0.343436	1	0.000170762	-0.000215529	0.000557053	0	0	0	0	0	0	1	0	0	0	0	0	0	0	0	0	0
Brevundimonas	0.00039805	0	0.343436	1	0.00039805	-0.000502401	0.0012985	0	0	0	0	0	0	0	0	0	2	0	0	0	0	0	0	0
Acidovorax	0.000195454	0	0.343436	1	0.000195454	-0.000246693	0.000637601	0	0	0	0	1	0	0	0	0	0	0	0	0	0	0	0	0
Phenylobacterium	0.00019345	0	0.343436	1	0.00019345	-0.000244164	0.000631064	0	0	0	0	0	0	0	0	1	0	0	0	0	0	0	0	0
Tepidisphaera	0.000199025	0	0.343436	0.9052	0.000199025	-0.000251201	0.00064925	0	0	0	0	0	0	0	0	0	1	0	0	0	0	0	0	0
Succiniclasticum	0.000161935	0	0.343436	0.96739	0.000161935	-0.000204388	0.000528259	1	0	0	0	0	0	0	0	0	0	0	0	0	0	0	0	0
Sandarakinorhabdus	0.000390907	0	0.343436	0.982388	0.000390907	-0.000493387	0.0012752	0	0	0	0	2	0	0	0	0	0	0	0	0	0	0	0	0
Acetivibrio	0.00019345	0	0.343436	1	0.00019345	-0.000244164	0.000631064	0	0	0	0	0	0	0	0	1	0	0	0	0	0	0	0	0
Cellulosibacter	0.0191107	0.0260725	0.344536	0.901658	-0.0069618	-0.0225204	0.00859681	20	4	3	3	12	13	8	14	14	7	27	9	17	6	23	5	13
Yersinia	0	0.0152951	0.348344	0.905205	-0.0152951	-0.0520912	0.0215009	0	0	0	0	0	0	0	0	0	0	0	0	0	0	0	1	54
Opitutus	0	0.000539807	0.355918	0.875558	-0.000539807	-0.00186067	0.000781053	0	0	0	0	0	0	0	0	0	0	0	0	0	2	0	0	0
Caldisericum	0	0.000557676	0.355918	0.893426	-0.000557676	-0.00192226	0.000806908	0	0	0	0	0	0	0	0	0	0	0	0	0	0	2	0	0
Geobacter	0	0.000557676	0.355918	0.912039	-0.000557676	-0.00192226	0.000806908	0	0	0	0	0	0	0	0	0	0	0	0	0	0	2	0	0
Methanothrix	0	0.000278838	0.355918	0.85839	-0.000278838	-0.00096113	0.000403454	0	0	0	0	0	0	0	0	0	0	0	0	0	0	1	0	0
Dokdonella	0	0.000269903	0.355918	0.899545	-0.000269903	-0.000930333	0.000390526	0	0	0	0	0	0	0	0	0	0	0	0	0	1	0	0	0
Ilumatobacter	0	0.000269903	0.355918	0.852816	-0.000269903	-0.000930333	0.000390526	0	0	0	0	0	0	0	0	0	0	0	0	0	1	0	0	0
Aminicenantes_genera_incertae_sedis	0	0.000557676	0.355918	0.869759	-0.000557676	-0.00192226	0.000806908	0	0	0	0	0	0	0	0	0	0	0	0	0	0	2	0	0
Fictibacillus	0	0.00111535	0.355918	0.918417	-0.00111535	-0.00384452	0.00161382	0	0	0	0	0	0	0	0	0	0	0	0	0	0	4	0	0
Altererythrobacter	0	0.000557676	0.355918	0.864037	-0.000557676	-0.00192226	0.000806908	0	0	0	0	0	0	0	0	0	0	0	0	0	0	2	0	0
Megamonas	0	0.000278838	0.355918	0.887389	-0.000278838	-0.00096113	0.000403454	0	0	0	0	0	0	0	0	0	0	0	0	0	0	1	0	0
Enterobacter	0	0.000557676	0.355918	0.905749	-0.000557676	-0.00192226	0.000806908	0	0	0	0	0	0	0	0	0	0	0	0	0	0	2	0	0
Photobacterium	0	0.000557676	0.355918	0.881434	-0.000557676	-0.00192226	0.000806908	0	0	0	0	0	0	0	0	0	0	0	0	0	0	2	0	0
Tepidiphilus	0	0.000443959	0.355918	0.815737	-0.000443959	-0.00153029	0.00064237	0	0	0	0	0	0	0	0	0	0	0	0	0	0	0	2	0
Anaerophaga	0	0.00022198	0.355918	0.810701	-0.00022198	-0.000765144	0.000321185	0	0	0	0	0	0	0	0	0	0	0	0	0	0	0	1	0
Halomonas	0	0.00022198	0.355918	0.83652	-0.00022198	-0.000765144	0.000321185	0	0	0	0	0	0	0	0	0	0	0	0	0	0	0	1	0
Labrenzia	0	0.00022198	0.355918	0.831225	-0.00022198	-0.000765144	0.000321185	0	0	0	0	0	0	0	0	0	0	0	0	0	0	0	1	0
Aquisphaera	0	0.000498751	0.355918	0.825998	-0.000498751	-0.00171915	0.000721648	0	0	0	0	0	0	0	0	0	0	0	0	2	0	0	0	0
Desulfosalsimonas	0	0.000503639	0.355918	0.820835	-0.000503639	-0.001736	0.000728721	0	0	0	0	0	0	0	0	0	0	2	0	0	0	0	0	0
Acidaminobacter	0	0.00100563	0.355918	0.847314	-0.00100563	-0.00346631	0.00145506	0	0	0	0	0	0	0	0	0	0	0	4	0	0	0	0	0
Aquamicrobium	0	0.000558265	0.355918	0.805728	-0.000558265	-0.00192429	0.00080776	0	0	0	0	0	0	0	0	0	0	0	0	0	0	0	0	2
Phocoenobacter	0	0.00100563	0.355918	0.841882	-0.00100563	-0.00346631	0.00145506	0	0	0	0	0	0	0	0	0	0	0	4	0	0	0	0	0
Rhodovibrio	0	0.000503639	0.355918	0.800815	-0.000503639	-0.001736	0.000728721	0	0	0	0	0	0	0	0	0	0	2	0	0	0	0	0	0
Akkermansia	0.0423867	0.00167479	0.359864	0.804786	0.0407119	-0.0547177	0.136142	0	0	0	0	0	0	0	0	1	212	0	0	0	0	0	0	6
Rhodopirellula	0.00173231	0.000249375	0.36181	0.804265	0.00148294	-0.00199172	0.00495759	0	0	0	0	1	0	9	0	0	0	0	0	1	0	0	0	0
Dorea	0.261073	0.412959	0.362496	0.800964	-0.151886	-0.506801	0.203028	106	18	492	112	60	72	114	285	72	82	70	60	212	39	530	485	220
Saccharofermentans	0.0139187	0.0021219	0.368839	0.810129	0.0117968	-0.016381	0.0399746	0	0	0	0	0	4	1	0	0	63	0	3	0	3	1	0	1
Enteractinococcus	0.00303959	0.00127183	0.370326	0.808583	0.00176776	-0.00242404	0.00595956	0	4	0	0	0	6	2	0	1	0	0	0	0	1	1	2	1
Mesorhizobium	0.00172806	0.000753014	0.377833	0.820119	0.000975043	-0.00132581	0.0032759	0	0	0	4	0	0	4	2	0	0	2	0	1	0	0	0	0
Ezakiella	0.00195246	0.000558265	0.381047	0.82226	0.00139419	-0.00195537	0.00474375	0	0	0	0	3	0	8	0	0	0	0	0	0	0	0	0	2
Shuttleworthia	0.000195454	0.0036249	0.381077	0.817544	-0.00342944	-0.0122997	0.0054408	0	0	0	0	1	0	0	0	0	0	0	0	0	0	13	0	0
Cellulosilyticum	0.00265709	0.00146646	0.381424	0.813558	0.00119062	-0.00168379	0.00406503	1	1	0	0	2	3	6	0	0	0	1	1	1	1	0	2	0
Faecalitalea	0.0026118	0.0387588	0.383573	0.81344	-0.036147	-0.130195	0.057901	1	0	1	10	1	1	0	0	0	0	0	0	0	0	138	0	1
Acetanaerobacterium	0.410972	0.491438	0.388488	0.819156	-0.0804658	-0.273971	0.11304	274	406	149	182	310	109	96	428	87	192	286	169	182	201	338	470	282
Senegalimassilia	0.0601373	0.135064	0.397211	0.832789	-0.0749272	-0.274508	0.124653	48	23	40	55	21	44	39	41	2	0	44	7	28	58	317	19	25
Chlamydia	0.0265009	0.191163	0.399132	0.832088	-0.164662	-0.608443	0.279119	29	35	4	8	24	16	12	4	5	2	16	2	0	677	5	0	9
Campylobacter	0.015503	0.0485398	0.411319	0.852679	-0.0330368	-0.123642	0.0575684	40	10	2	2	22	4	2	2	1	1	152	11	0	22	2	2	2
Plesiomonas	0.00116627	0.00391721	0.414029	0.8535	-0.00275094	-0.0102089	0.00470702	0	0	0	0	0	0	0	0	5	1	1	0	0	0	2	14	0
Macellibacteroides	0.096505	0.0475246	0.414316	0.849348	0.0489804	-0.0776951	0.175656	356	26	5	20	14	3	17	56	36	35	26	7	91	2	2	28	33
Phascolarctobacterium	0.109709	0.0651385	0.423307	0.862984	0.0445706	-0.0713198	0.160461	312	54	5	22	35	33	94	18	36	11	16	110	9	16	3	96	17
Atopostipes	0.000836157	0.00377039	0.432729	0.877345	-0.00293423	-0.011398	0.00552957	2	0	0	0	0	0	3	0	0	0	0	0	14	0	0	0	1
Enterorhabdus	0.076762	0.1454	0.434969	0.877069	-0.0686376	-0.263748	0.126473	15	17	77	69	17	88	25	45	4	13	62	10	36	64	314	33	22
Trueperella	0.00501817	0.0023289	0.435973	0.874315	0.00268927	-0.00466418	0.0100427	1	0	0	0	0	3	19	3	0	1	1	1	4	1	0	0	2
Sporobacter	1.32204	1.91592	0.436446	0.870532	-0.59388	-2.27502	1.08726	838	1056	275	468	1065	118	1446	548	1189	291	1480	1514	305	550	188	3463	419
Anaerobacterium	0.017331	0.0889143	0.43773	0.868399	-0.0715834	-0.282122	0.138955	4	13	0	0	12	12	0	21	9	16	0	4	5	0	310	1	0
Erythrobacter	0.000302343	0.00175985	0.443872	0.875876	-0.00145751	-0.0057682	0.00285318	0	0	0	0	0	1	0	0	0	0	0	7	0	0	0	0	0
Stenotrophomonas	0.000585924	0.00022198	0.452876	0.88889	0.000363945	-0.00065071	0.0013786	0	0	0	0	0	0	0	0	2	1	0	0	0	0	0	1	0
Elusimicrobium	0.000669151	0.000269903	0.456778	0.891805	0.000399248	-0.000719704	0.0015182	2	2	0	0	0	0	0	0	0	0	0	0	0	1	0	0	0
Faecalibacterium	0.312101	0.241186	0.466914	0.906797	0.0709154	-0.131593	0.273423	89	22	267	451	113	141	251	187	69	65	69	59	112	42	268	194	186
Bosea	0.0003869	0.000771098	0.480821	0.928915	-0.000384198	-0.00151829	0.000749895	0	0	0	0	0	0	0	0	2	0	1	0	1	1	0	0	0
Corynebacterium	0.954058	0.73782	0.480981	0.924385	0.216237	-0.430287	0.862762	680	735	210	404	136	655	780	908	239	252	462	141	196	159	903	173	731
Porphyromonas	0.00229606	0.000818939	0.482096	0.921728	0.00147712	-0.00301145	0.0059657	0	0	0	0	10	0	2	0	0	0	0	0	0	2	0	0	1
Anaerococcus	0.00918286	0.00522219	0.484169	0.92092	0.00396066	-0.00799044	0.0159118	3	0	2	1	2	5	31	1	1	3	3	0	9	1	5	0	2
Staphylococcus	0.00757185	0.0133451	0.491485	0.930042	-0.00577322	-0.0243938	0.0128473	4	15	1	1	4	1	9	0	7	0	5	0	0	1	29	8	7
Aestuariispira	0.000195454	0.000754222	0.497119	0.935902	-0.000558768	-0.00241146	0.00129393	0	0	0	0	1	0	0	0	0	0	0	3	0	0	0	0	0
Desulfovibrio	0.00339704	0.00643323	0.507257	0.950141	-0.00303619	-0.0131866	0.00711418	2	0	0	2	6	4	0	2	0	0	1	17	0	5	1	0	1
Butyricicoccus	0.796444	1.2197	0.509705	0.949905	-0.423253	-1.82543	0.978922	206	22	1349	1087	201	272	397	646	35	80	43	62	952	19	2109	1156	380
Rhodobacter	0.000341524	0.000768654	0.510144	0.945945	-0.00042713	-0.00181006	0.000955796	0	0	0	0	0	0	2	0	0	0	0	0	2	1	0	0	0
Megasphaera	0.0221278	0.0155526	0.510714	0.942267	0.00657513	-0.0142348	0.027385	4	34	0	8	22	18	0	1	17	5	24	10	1	19	1	1	4
Methanosphaera	0.025033	0.0388019	0.521061	0.956575	-0.0137689	-0.0625186	0.0349807	25	14	15	27	10	11	4	14	10	4	74	4	0	4	15	1	49
Nosocomiicoccus	0.0035593	0.00228552	0.521071	0.951857	0.00127378	-0.0029116	0.00545915	8	8	0	0	0	1	0	0	3	0	2	0	0	0	2	3	2
Pilibacter	0.00186505	0.0013496	0.528916	0.961429	0.000515449	-0.00119039	0.00222128	1	1	2	0	0	2	0	1	1	1	1	0	0	2	1	0	1
Leucobacter	0.00104914	0.000503639	0.531356	0.961129	0.000545499	-0.00127031	0.00236131	0	1	0	0	0	0	4	0	1	0	2	0	0	0	0	0	0
Simplicispira	0.000168566	0.000539807	0.531988	0.957578	-0.000371241	-0.00170164	0.000959159	0	0	0	0	0	0	0	1	0	0	0	0	0	2	0	0	0
Paludibacter	0.00356387	0.00605386	0.53408	0.956677	-0.00248999	-0.0111259	0.00614591	10	0	0	0	5	0	0	0	5	0	8	13	0	1	0	1	1
Parcubacteria_genera_incertae_sedis	0.000176969	0.000539807	0.542515	0.967092	-0.000362837	-0.00169491	0.000969238	0	0	0	1	0	0	0	0	0	0	0	0	0	2	0	0	0
Lactobacillus	18.7764	24.4797	0.547913	0.972018	-5.70339	-25.9281	14.5213	1084	7453	25985	4442	17609	3996	10778	4024	2669	20621	4861	11636	34685	4312	2889	25831	14249
Fibrobacter	0.011688	0.0221212	0.548434	0.968287	-0.0104332	-0.0494392	0.0285728	26	0	4	0	6	0	4	2	4	19	65	10	0	12	0	0	0
Ethanoligenens	0.0323754	0.0184873	0.548746	0.964226	0.0138881	-0.0355447	0.0633208	136	6	0	1	4	0	15	5	4	21	33	11	14	4	3	4	4
Eisenbergiella	0.000182372	0.000539807	0.549351	0.960713	-0.000357435	-0.00169069	0.000975819	0	0	1	0	0	0	0	0	0	0	0	0	0	2	0	0	0
Catenibacterium	0.160929	0.27044	0.558414	0.971956	-0.109511	-0.525488	0.306467	56	10	101	99	51	221	29	161	10	17	91	75	84	27	651	11	59
Vasilyevaea	0.000540549	0.000269903	0.567331	0.982841	0.000270646	-0.00071662	0.00125791	0	0	0	0	0	0	2	0	0	1	0	0	0	1	0	0	0
Peptococcus	0.129798	0.172342	0.570388	0.983519	-0.0425438	-0.210279	0.125191	128	43	24	58	41	42	102	148	99	24	122	35	31	297	45	83	50
Oligosphaera	0.000507215	0.000251407	0.572393	0.982385	0.000255808	-0.000690441	0.00120206	1	2	0	0	0	0	0	0	0	0	0	1	0	0	0	0	0
Fusicatenibacter	0.0102417	0.00757396	0.574898	0.982118	0.00266778	-0.00726282	0.0125984	0	0	7	11	1	9	3	19	2	0	1	3	6	0	11	4	4
Gemmiger	1.50137	1.82068	0.578616	0.983914	-0.319308	-1.52827	0.889655	497	124	895	2150	589	636	1314	1500	200	163	540	238	1340	431	1837	1484	1192
Acinetobacter	0.0101205	0.00700707	0.58656	0.992847	0.00311344	-0.00899269	0.0152196	1	14	1	1	1	4	3	1	14	12	1	3	19	2	0	2	1
Armatimonadetes_gp5	0.000195454	0.000498751	0.58706	0.989157	-0.000303297	-0.0015424	0.000935804	0	0	0	0	1	0	0	0	0	0	0	0	2	0	0	0	0
Howardella	0.00193989	0.00322182	0.589228	0.988297	-0.00128192	-0.00669391	0.00413007	2	1	1	0	1	0	2	2	2	0	3	0	9	0	0	1	0
Mitsuokella	0.00261105	0.00362643	0.593819	0.991489	-0.00101537	-0.00502214	0.00299139	2	1	0	0	6	2	0	2	0	0	6	0	2	0	3	1	2
Pseudobutyrivibrio	0.0199708	0.0247574	0.599555	0.996558	-0.00478664	-0.0240122	0.014439	34	3	17	6	12	0	1	6	20	12	9	10	14	11	0	37	19
Rothia	0.000512286	0.00022198	0.612495	1	0.000290307	-0.000925488	0.0015061	0	0	0	0	0	0	3	0	0	0	0	0	0	0	0	1	0
Jeotgalibaca	0.000842892	0.000498751	0.61423	1	0.000344142	-0.00109085	0.00177914	0	0	0	0	0	1	2	0	0	1	0	0	2	0	0	0	0
Actinobacillus	0.00051009	0.000279132	0.621759	1	0.000230958	-0.000746506	0.00120842	0	0	0	0	0	0	2	1	0	0	0	0	0	0	0	0	1
Anaerocella	0.17303	0.300573	0.625021	1	-0.127543	-0.711471	0.456385	494	15	2	0	190	0	2	49	43	181	3	960	0	15	0	220	20
Butyricimonas	0.0012034	0.000779656	0.627496	1	0.000423742	-0.00140006	0.00224754	0	0	3	2	0	1	0	0	0	0	0	0	0	0	2	1	0
Pseudoflavonifractor	0.0111174	0.013862	0.629436	1	-0.00274457	-0.0150037	0.00951457	5	3	6	7	4	10	3	14	3	1	7	2	11	1	20	6	6
Turicibacter	0.455584	0.391376	0.63117	1	0.0642084	-0.215303	0.34372	399	286	64	169	122	199	673	299	191	69	247	59	61	223	196	331	397
Bacteroides	0.019189	0.024817	0.644699	1	-0.00562797	-0.0316007	0.0203448	40	9	0	3	24	0	1	4	15	11	46	7	9	15	7	7	6
Hungatella	0.00427193	0.00333638	0.645723	1	0.000935548	-0.00331819	0.00518928	1	10	0	1	2	1	2	0	4	2	2	5	3	1	2	0	0
Thermomonas	0.000737378	0.000491883	0.650405	1	0.000245495	-0.000886472	0.00137746	0	0	0	0	0	0	1	1	0	2	0	0	0	1	0	1	0
Mobiluncus	0.00256351	0.00163788	0.658739	1	0.000925633	-0.00346463	0.0053159	0	0	0	0	7	0	7	0	0	0	0	0	0	4	0	0	2
Anaerosporobacter	0.00214826	0.00150674	0.660871	1	0.000641518	-0.00241703	0.00370006	2	1	0	6	2	0	0	0	0	1	0	4	0	0	0	1	1
Veillonella	0.000364212	0.00022198	0.672126	1	0.000142232	-0.000560652	0.000845117	0	0	0	0	0	0	1	0	1	0	0	0	0	0	0	1	0
Sharpea	0.00598228	0.0077774	0.683086	1	-0.00179511	-0.0112777	0.00768752	2	1	1	5	4	3	1	14	0	1	2	1	2	0	14	3	7
Millisia	0.00136475	0.00104985	0.687981	1	0.000314898	-0.00133643	0.00196623	0	0	0	0	0	2	0	1	1	2	0	0	0	1	1	1	1
Anaerotruncus	0.00431948	0.00684327	0.696623	1	-0.00252379	-0.0171343	0.0120867	8	2	0	1	2	0	1	0	9	1	1	24	0	0	2	0	0
Ruminococcus	1.01714	1.2238	0.698518	1	-0.206658	-1.38808	0.974762	1654	366	544	286	421	239	811	457	600	252	136	2118	361	327	333	1340	317
Clostridium IV	1.55043	1.70973	0.700015	1	-0.159295	-1.03362	0.715029	1393	1539	499	345	542	326	1536	1324	750	362	1099	939	489	1600	1271	731	453
Coprococcus	0.345326	0.389464	0.708977	1	-0.0441376	-0.296935	0.20866	133	45	415	106	123	170	287	250	204	78	104	201	187	72	137	533	323
Catabacter	0.00196546	0.0015345	0.71095	1	0.000430951	-0.00201865	0.00288055	2	0	1	0	0	0	0	4	2	2	0	2	0	3	0	1	0
Parabacteroides	0.00944241	0.00814703	0.713579	1	0.00129538	-0.00617075	0.0087615	6	4	0	12	5	6	1	9	3	3	4	9	3	6	9	0	0
Clostridium sensu stricto	0.61455	0.695301	0.715436	1	-0.0807512	-0.553791	0.392289	285	114	141	721	234	344	687	284	201	209	314	206	115	413	201	663	792
Oscillibacter	2.03832	1.8011	0.724059	1	0.23722	-1.24572	1.72016	1693	1940	596	1013	1029	485	734	815	1785	932	926	1578	651	2602	336	500	365
Dialister	0.0378153	0.0292998	0.724774	1	0.00851553	-0.0427373	0.0597684	11	10	0	87	1	58	0	7	0	0	9	5	28	19	40	0	9
Oribacterium	0.310899	0.383121	0.734696	1	-0.072222	-0.533034	0.38859	182	54	112	632	281	75	25	290	13	33	60	81	67	180	733	184	133
Eubacterium	0.669015	0.576056	0.735498	1	0.0929585	-0.491661	0.677577	140	82	342	144	228	144	558	1643	142	284	437	157	148	193	318	676	354
Succinivibrio	0.0125004	0.0151363	0.735885	1	-0.00263591	-0.0195475	0.0142757	20	5	2	17	8	8	3	2	1	0	8	4	7	0	27	4	7
Allisonella	0.00578381	0.00470551	0.736642	1	0.0010783	-0.00577391	0.00793051	18	3	1	8	2	0	0	1	1	0	4	2	1	1	3	2	5
Pirellula	0.00153686	0.000993078	0.737401	1	0.000543781	-0.00297294	0.0040605	0	0	0	0	0	0	9	0	0	0	1	0	1	1	0	1	0
Paraprevotella	0.0470402	0.0559939	0.738593	1	-0.00895369	-0.0672678	0.0493604	42	33	7	4	32	14	20	5	18	72	23	66	12	87	5	7	15
Lachnospira	0.000168566	0.000279132	0.741388	1	-0.000110567	-0.000834595	0.000613462	0	0	0	0	0	0	0	1	0	0	0	0	0	0	0	0	1
Sutterella	0.00243167	0.00205245	0.746737	1	0.000379219	-0.00207875	0.00283719	1	0	1	5	1	1	0	3	0	1	1	0	1	1	0	2	3
Pusillimonas	0.000170762	0.000279132	0.747106	1	-0.00010837	-0.000834014	0.000617274	0	0	0	0	0	0	1	0	0	0	0	0	0	0	0	0	1
Malikia	0.000170762	0.000278838	0.747575	1	-0.000108076	-0.000833089	0.000616937	0	0	0	0	0	0	1	0	0	0	0	0	0	0	1	0	0
Kitasatospora	0.00017264	0.000279132	0.751987	1	-0.000106492	-0.000833545	0.00062056	0	1	0	0	0	0	0	0	0	0	0	0	0	0	0	0	1
Parasutterella	0.000161935	0.000249375	0.774255	1	-8.74399e-05	-0.000743048	0.000568169	1	0	0	0	0	0	0	0	0	0	0	0	1	0	0	0	0
Defluviimonas	0.000161935	0.000249375	0.774255	1	-8.74399e-05	-0.000743048	0.000568169	1	0	0	0	0	0	0	0	0	0	0	0	1	0	0	0	0
Falsiporphyromonas	0.0466648	0.0409735	0.780701	1	0.00569136	-0.0376428	0.0490256	53	70	1	12	44	1	18	15	30	17	54	25	1	52	4	3	18
Christensenella	0.00733006	0.00799333	0.782795	1	-0.000663268	-0.00594719	0.00462065	8	5	2	4	4	2	3	6	1	5	0	5	7	9	4	4	2
Mogibacterium	0.0254944	0.0290421	0.78449	1	-0.00354776	-0.0320312	0.0249357	18	15	2	13	14	12	10	10	35	4	50	6	1	16	12	4	22
Klebsiella	0.00212795	0.00150245	0.793821	1	0.000625495	-0.00446038	0.00571137	0	0	0	0	0	0	0	0	11	0	0	0	0	0	3	3	0
unclassified	23.3015	24.1759	0.799674	1	-0.87446	-8.18917	6.44025	21894	14514	7416	14883	11225	7201	17340	11738	12951	7275	16266	16139	7503	16322	15407	11534	10352
Defluviitalea	0.000674766	0.000807346	0.803648	1	-0.00013258	-0.00125483	0.000989672	0	0	0	1	1	1	0	0	0	0	0	0	1	0	1	0	1
Mucispirillum	0.000195454	0.000279132	0.810352	1	-8.36786e-05	-0.000829836	0.000662479	0	0	0	0	1	0	0	0	0	0	0	0	0	0	0	0	1
Treponema	1.72368	2.22223	0.812195	1	-0.498549	-5.12616	4.12906	438	494	120	43	240	93	4676	136	2949	357	223	7494	39	820	35	70	92
Lachnospiracea_incertae_sedis	5.21415	5.69374	0.816932	1	-0.479591	-4.99938	4.04019	1321	4268	2027	2107	3595	1435	1172	3274	6332	2047	7542	1368	864	4970	4049	388	2431
Nesterenkonia	0.000362016	0.000279132	0.82589	1	8.28833e-05	-0.000713034	0.000878801	0	0	0	0	0	0	0	1	1	0	0	0	0	0	0	0	1
Roseburia	0.592986	0.544044	0.835464	1	0.048942	-0.455964	0.553848	541	46	531	642	379	111	519	459	33	35	52	112	255	36	746	457	430
Gp3	0.000199025	0.000269903	0.836171	1	-7.08786e-05	-0.000801917	0.000660159	0	0	0	0	0	0	0	0	0	1	0	0	0	1	0	0	0
Arthrobacter	0.00102457	0.00127878	0.84321	1	-0.000254211	-0.00294929	0.00244087	0	0	0	0	0	0	6	0	0	0	1	0	3	0	1	0	0
Bradyrhizobium	0.000195454	0.000251819	0.862503	1	-5.63656e-05	-0.0007484	0.000635669	0	0	0	0	1	0	0	0	0	0	1	0	0	0	0	0	0
Syntrophococcus	0.000323871	0.000251819	0.86294	1	7.20515e-05	-0.000802548	0.000946651	2	0	0	0	0	0	0	0	0	0	1	0	0	0	0	0	0
Coprobacillus	0.000355385	0.000443959	0.864153	1	-8.85738e-05	-0.00122035	0.0010432	1	0	0	0	0	0	0	0	1	0	0	0	0	0	0	2	0
Saccharibacteria_genera_incertae_sedis	0.217213	0.233999	0.867429	1	-0.0167868	-0.238543	0.204969	233	63	77	226	228	54	68	103	67	59	324	37	132	74	12	38	281
Facklamia	0.00206649	0.00178723	0.868978	1	0.000279262	-0.00327424	0.00383276	0	0	0	0	0	1	8	0	0	2	4	0	0	0	1	1	1
Xanthobacter	0.000199025	0.000251819	0.871967	1	-5.27946e-05	-0.000748648	0.000643058	0	0	0	0	0	0	0	0	0	1	1	0	0	0	0	0	0
Rhizobium	0.000199025	0.000249375	0.877097	1	-5.03505e-05	-0.000741552	0.000640851	0	0	0	0	0	0	0	0	0	1	0	0	1	0	0	0	0
Terrisporobacter	3.76005	3.91401	0.886127	1	-0.153955	-2.40817	2.10026	2147	732	1044	4311	1199	1541	3193	4539	1169	482	2424	486	1787	1527	2733	2738	3417
Acetatifactor	0.00942176	0.0101485	0.88848	1	-0.000726728	-0.0118915	0.010438	8	0	0	8	5	0	12	1	12	6	1	11	4	0	2	5	16
Pseudaminobacter	0.000341524	0.000279132	0.889395	1	6.23919e-05	-0.000877753	0.00100254	0	0	0	0	0	0	2	0	0	0	0	0	0	0	0	0	1
Sphingomonas	0.000341524	0.000279132	0.889395	1	6.23919e-05	-0.000877753	0.00100254	0	0	0	0	0	0	2	0	0	0	0	0	0	0	0	0	1
Flavonifractor	0.191074	0.184518	0.891364	1	0.00655575	-0.0940899	0.107201	205	245	18	59	99	49	68	92	148	60	109	108	90	140	50	187	51
Methanomassiliicoccus	0.000875861	0.000754222	0.893351	1	0.00012164	-0.00184084	0.00208412	0	2	0	0	0	0	0	2	1	0	0	3	0	0	0	0	0
Alloiococcus	0.000302343	0.000249375	0.89429	1	5.29678e-05	-0.000782392	0.000888328	0	0	0	0	0	1	0	0	0	0	0	0	1	0	0	0	0
Paracoccus	0.00067646	0.000772718	0.898189	1	-9.62582e-05	-0.00167881	0.00148629	0	0	0	0	0	0	1	3	0	0	0	2	0	1	0	0	0
Butyrivibrio	0.0123161	0.0112642	0.901146	1	0.00105185	-0.0167142	0.0188179	4	0	1	40	1	1	2	5	11	3	7	1	22	3	7	2	2
Subdoligranulum	0.000632844	0.000557676	0.910793	1	7.51682e-05	-0.0013761	0.00152644	1	0	0	0	0	1	0	1	0	0	0	0	0	0	2	0	0
Rummeliibacillus	0.00375677	0.00328573	0.917693	1	0.000471033	-0.00911221	0.0100543	0	0	0	0	0	0	22	0	0	0	2	0	0	1	0	0	9
Erysipelothrix	0.107264	0.110634	0.921582	1	-0.00336914	-0.0752498	0.0685115	129	26	19	137	41	27	61	109	26	21	107	10	58	36	47	77	96
Novosphingobium	0.00075869	0.000800149	0.933748	1	-4.14583e-05	-0.00109877	0.00101585	0	0	0	0	1	0	1	0	1	1	0	1	0	1	1	0	0
Nocardiopsis	0.00120475	0.0011073	0.935854	1	9.74479e-05	-0.00244695	0.00264184	0	0	1	0	0	0	5	1	0	0	0	0	0	1	0	0	3
Methanobrevibacter	0.198309	0.208666	0.936154	1	-0.0103571	-0.287112	0.266397	64	113	18	35	16	157	84	51	385	55	318	364	1	56	12	1	65
Levilinea	0.000302343	0.000269903	0.937271	1	3.24398e-05	-0.000832007	0.000896886	0	0	0	0	0	1	0	0	0	0	0	0	0	1	0	0	0
Sphaerochaeta	0.0281199	0.0274147	0.946218	1	0.000705175	-0.0215633	0.0229736	8	23	5	15	8	5	28	10	37	13	23	23	3	28	5	0	22
Intestinibacter	0.00202402	0.00192329	0.949713	1	0.00010073	-0.00324892	0.00345038	0	0	2	1	0	1	0	7	0	0	0	0	1	0	3	0	3
Asteroleplasma	0.0100382	0.0103383	0.9628	1	-0.000300025	-0.0138871	0.013287	3	0	3	33	2	3	6	5	0	0	6	2	5	13	9	1	3
Romboutsia	0.539735	0.547857	0.965114	1	-0.00812212	-0.416862	0.400618	423	227	102	414	190	294	442	343	347	69	426	65	141	177	332	234	705
Anaerosphaera	0.000946211	0.000997501	0.966573	1	-5.12907e-05	-0.00268441	0.00258183	0	0	0	0	0	2	2	0	0	0	0	0	4	0	0	0	0
Anaerofustis	0.00219239	0.00224974	0.967912	1	-5.73506e-05	-0.00314226	0.00302756	1	1	0	2	0	2	3	0	2	0	0	5	0	1	1	2	0
Holdemania	0.29893	0.302614	0.968913	1	-0.00368384	-0.212383	0.205015	171	139	109	334	135	111	212	148	180	62	415	70	81	211	158	71	156
Clostridium XlVb	0.0256837	0.0252358	0.968948	1	0.000447937	-0.0236752	0.0245711	17	7	8	56	22	2	3	6	10	10	22	5	20	3	2	23	25
Anaerobacter	3.98498	4.03854	0.96948	1	-0.0535646	-3.09565	2.98852	3301	1308	1076	4545	1158	1911	2522	3124	1901	477	4153	497	844	1182	2083	1982	4720
Finegoldia	0.00158424	0.00153823	0.974391	1	4.60108e-05	-0.00310379	0.00319581	2	1	0	0	3	1	0	0	0	1	5	0	0	0	0	0	1
Intestinimonas	0.348565	0.344209	0.977765	1	0.00435594	-0.327287	0.335999	136	90	84	62	85	307	202	532	150	111	172	208	67	539	44	202	105
Clostridium XI	0.174531	0.172839	0.97934	1	0.00169202	-0.136039	0.139423	95	24	76	181	38	192	166	28	32	22	105	33	70	50	143	122	144
Pyramidobacter	0.000511968	0.000503639	0.988595	1	8.32917e-06	-0.00127022	0.00128687	0	1	0	0	0	0	1	1	0	0	2	0	0	0	0	0	0
Legionella	0	0	1	1	0	0	0	0	0	0	0	0	0	0	0	0	0	0	0	0	0	0	0	0
Stomatobaculum	0	0	1	1	0	0	0	0	0	0	0	0	0	0	0	0	0	0	0	0	0	0	0	0
Longilinea	0	0	1	1	0	0	0	0	0	0	0	0	0	0	0	0	0	0	0	0	0	0	0	0
Lactonifactor	0	0	1	1	0	0	0	0	0	0	0	0	0	0	0	0	0	0	0	0	0	0	0	0
Desulfomonile	0	0	1	1	0	0	0	0	0	0	0	0	0	0	0	0	0	0	0	0	0	0	0	0
Raoultella	0	0	1	1	0	0	0	0	0	0	0	0	0	0	0	0	0	0	0	0	0	0	0	0
Providencia	0	0	1	1	0	0	0	0	0	0	0	0	0	0	0	0	0	0	0	0	0	0	0	0
Lachnobacterium	0	0	1	1	0	0	0	0	0	0	0	0	0	0	0	0	0	0	0	0	0	0	0	0
Janthinobacterium	0	0	1	1	0	0	0	0	0	0	0	0	0	0	0	0	0	0	0	0	0	0	0	0
Paenochrobactrum	0	0	1	1	0	0	0	0	0	0	0	0	0	0	0	0	0	0	0	0	0	0	0	0
Dechloromonas	0	0	1	1	0	0	0	0	0	0	0	0	0	0	0	0	0	0	0	0	0	0	0	0
Thauera	0	0	1	1	0	0	0	0	0	0	0	0	0	0	0	0	0	0	0	0	0	0	0	0
Blastocatella	0	0	1	1	0	0	0	0	0	0	0	0	0	0	0	0	0	0	0	0	0	0	0	0
Lactococcus	0	0	1	1	0	0	0	0	0	0	0	0	0	0	0	0	0	0	0	0	0	0	0	0
Hathewaya	0	0	1	1	0	0	0	0	0	0	0	0	0	0	0	0	0	0	0	0	0	0	0	0
Thiobacillus	0	0	1	1	0	0	0	0	0	0	0	0	0	0	0	0	0	0	0	0	0	0	0	0
Anaeromyxobacter	0	0	1	1	0	0	0	0	0	0	0	0	0	0	0	0	0	0	0	0	0	0	0	0
Singulisphaera	0	0	1	1	0	0	0	0	0	0	0	0	0	0	0	0	0	0	0	0	0	0	0	0
Ferruginibacter	0	0	1	1	0	0	0	0	0	0	0	0	0	0	0	0	0	0	0	0	0	0	0	0
Mobilitalea	0	0	1	1	0	0	0	0	0	0	0	0	0	0	0	0	0	0	0	0	0	0	0	0
Methylobacterium	0	0	1	1	0	0	0	0	0	0	0	0	0	0	0	0	0	0	0	0	0	0	0	0
Paenibacillus	0	0	1	1	0	0	0	0	0	0	0	0	0	0	0	0	0	0	0	0	0	0	0	0
Methylophaga	0	0	1	1	0	0	0	0	0	0	0	0	0	0	0	0	0	0	0	0	0	0	0	0
Zavarzinella	0	0	1	1	0	0	0	0	0	0	0	0	0	0	0	0	0	0	0	0	0	0	0	0
Streptomyces	0	0	1	1	0	0	0	0	0	0	0	0	0	0	0	0	0	0	0	0	0	0	0	0
Pelospora	0	0	1	1	0	0	0	0	0	0	0	0	0	0	0	0	0	0	0	0	0	0	0	0
Hespellia	0	0	1	1	0	0	0	0	0	0	0	0	0	0	0	0	0	0	0	0	0	0	0	0
Pedomicrobium	0	0	1	1	0	0	0	0	0	0	0	0	0	0	0	0	0	0	0	0	0	0	0	0
Massilia	0	0	1	1	0	0	0	0	0	0	0	0	0	0	0	0	0	0	0	0	0	0	0	0
Murdochiella	0	0	1	1	0	0	0	0	0	0	0	0	0	0	0	0	0	0	0	0	0	0	0	0
Stappia	0	0	1	1	0	0	0	0	0	0	0	0	0	0	0	0	0	0	0	0	0	0	0	0
Ignavibacterium	0	0	1	1	0	0	0	0	0	0	0	0	0	0	0	0	0	0	0	0	0	0	0	0
Tistrella	0	0	1	1	0	0	0	0	0	0	0	0	0	0	0	0	0	0	0	0	0	0	0	0
Gemmobacter	0	0	1	1	0	0	0	0	0	0	0	0	0	0	0	0	0	0	0	0	0	0	0	0
Sphingosinicella	0	0	1	1	0	0	0	0	0	0	0	0	0	0	0	0	0	0	0	0	0	0	0	0
Nitrincola	0	0	1	1	0	0	0	0	0	0	0	0	0	0	0	0	0	0	0	0	0	0	0	0
Acholeplasma	0	0	1	1	0	0	0	0	0	0	0	0	0	0	0	0	0	0	0	0	0	0	0	0
Tissierella	0	0	1	1	0	0	0	0	0	0	0	0	0	0	0	0	0	0	0	0	0	0	0	0
Pseudoxanthomonas	0	0	1	1	0	0	0	0	0	0	0	0	0	0	0	0	0	0	0	0	0	0	0	0
Gp6	0	0	1	1	0	0	0	0	0	0	0	0	0	0	0	0	0	0	0	0	0	0	0	0
Alcanivorax	0	0	1	1	0	0	0	0	0	0	0	0	0	0	0	0	0	0	0	0	0	0	0	0
Fontibacter	0	0	1	1	0	0	0	0	0	0	0	0	0	0	0	0	0	0	0	0	0	0	0	0
Salinispira	0	0	1	1	0	0	0	0	0	0	0	0	0	0	0	0	0	0	0	0	0	0	0	0
Sphingobacterium	0	0	1	1	0	0	0	0	0	0	0	0	0	0	0	0	0	0	0	0	0	0	0	0
Phaeodactylibacter	0	0	1	1	0	0	0	0	0	0	0	0	0	0	0	0	0	0	0	0	0	0	0	0
Stackebrandtia	0	0	1	1	0	0	0	0	0	0	0	0	0	0	0	0	0	0	0	0	0	0	0	0
Thermomarinilinea	0	0	1	1	0	0	0	0	0	0	0	0	0	0	0	0	0	0	0	0	0	0	0	0
Rhodoplanes	0	0	1	1	0	0	0	0	0	0	0	0	0	0	0	0	0	0	0	0	0	0	0	0
Acetoanaerobium	0	0	1	1	0	0	0	0	0	0	0	0	0	0	0	0	0	0	0	0	0	0	0	0
Candidatus Solibacter	0	0	1	1	0	0	0	0	0	0	0	0	0	0	0	0	0	0	0	0	0	0	0	0
Delftia	0	0	1	1	0	0	0	0	0	0	0	0	0	0	0	0	0	0	0	0	0	0	0	0
Catellicoccus	0	0	1	1	0	0	0	0	0	0	0	0	0	0	0	0	0	0	0	0	0	0	0	0
Povalibacter	0	0	1	1	0	0	0	0	0	0	0	0	0	0	0	0	0	0	0	0	0	0	0	0
Denitratisoma	0	0	1	1	0	0	0	0	0	0	0	0	0	0	0	0	0	0	0	0	0	0	0	0
Steroidobacter	0	0	1	1	0	0	0	0	0	0	0	0	0	0	0	0	0	0	0	0	0	0	0	0
Subdivision3_genera_incertae_sedis	0	0	1	1	0	0	0	0	0	0	0	0	0	0	0	0	0	0	0	0	0	0	0	0
Anaerobiospirillum	0	0	1	1	0	0	0	0	0	0	0	0	0	0	0	0	0	0	0	0	0	0	0	0
Gp1	0	0	1	1	0	0	0	0	0	0	0	0	0	0	0	0	0	0	0	0	0	0	0	0
Hyphomonas	0	0	1	1	0	0	0	0	0	0	0	0	0	0	0	0	0	0	0	0	0	0	0	0
Hyphomicrobium	0	0	1	1	0	0	0	0	0	0	0	0	0	0	0	0	0	0	0	0	0	0	0	0
Methanosarcina	0	0	1	1	0	0	0	0	0	0	0	0	0	0	0	0	0	0	0	0	0	0	0	0
